# Supplementary material for: Metabolomic Profiling and Antioxidant Activity of Fruits Representing Diverse Apple and Pear Cultivars
Source: MDPI journal article supplement (doi:10.3390/biology10050380), 2021-04-28

**Figure S2. Supervised O2PLS-DA of NMR and HPLC-DAD data matrices for apples and pears**

a) Apples, NMR dataset, O2PLS-DA score plots, 5+3 model

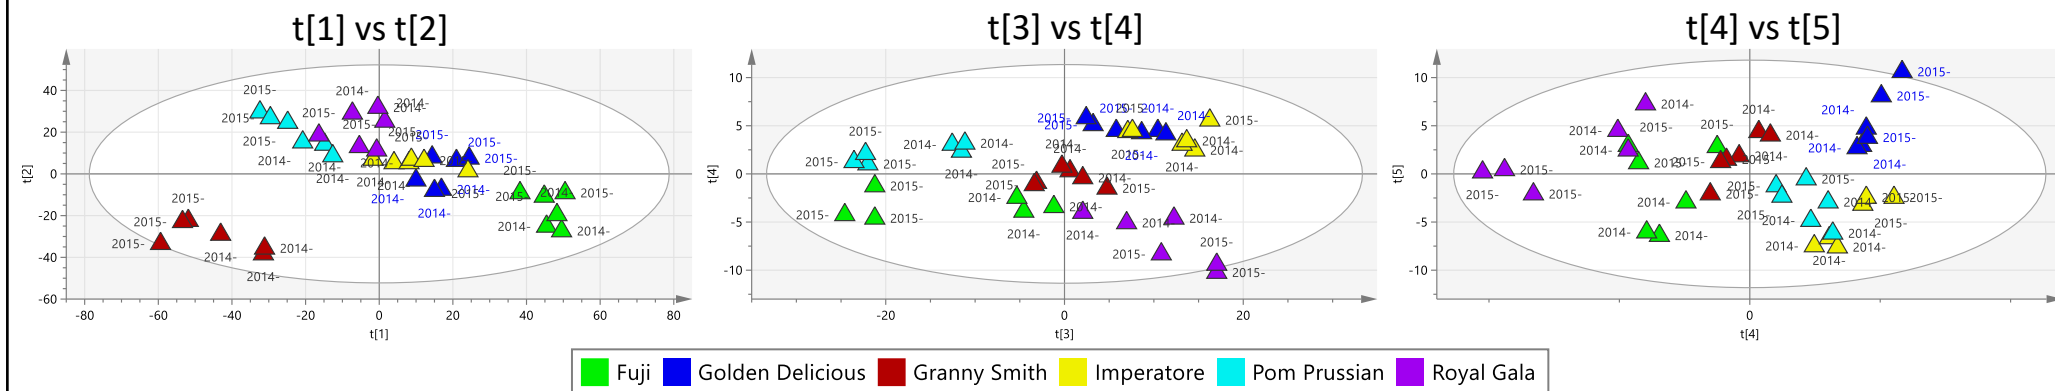

b) Apples, NMR dataset, O2PLS-DA loading plots, 5+3 model

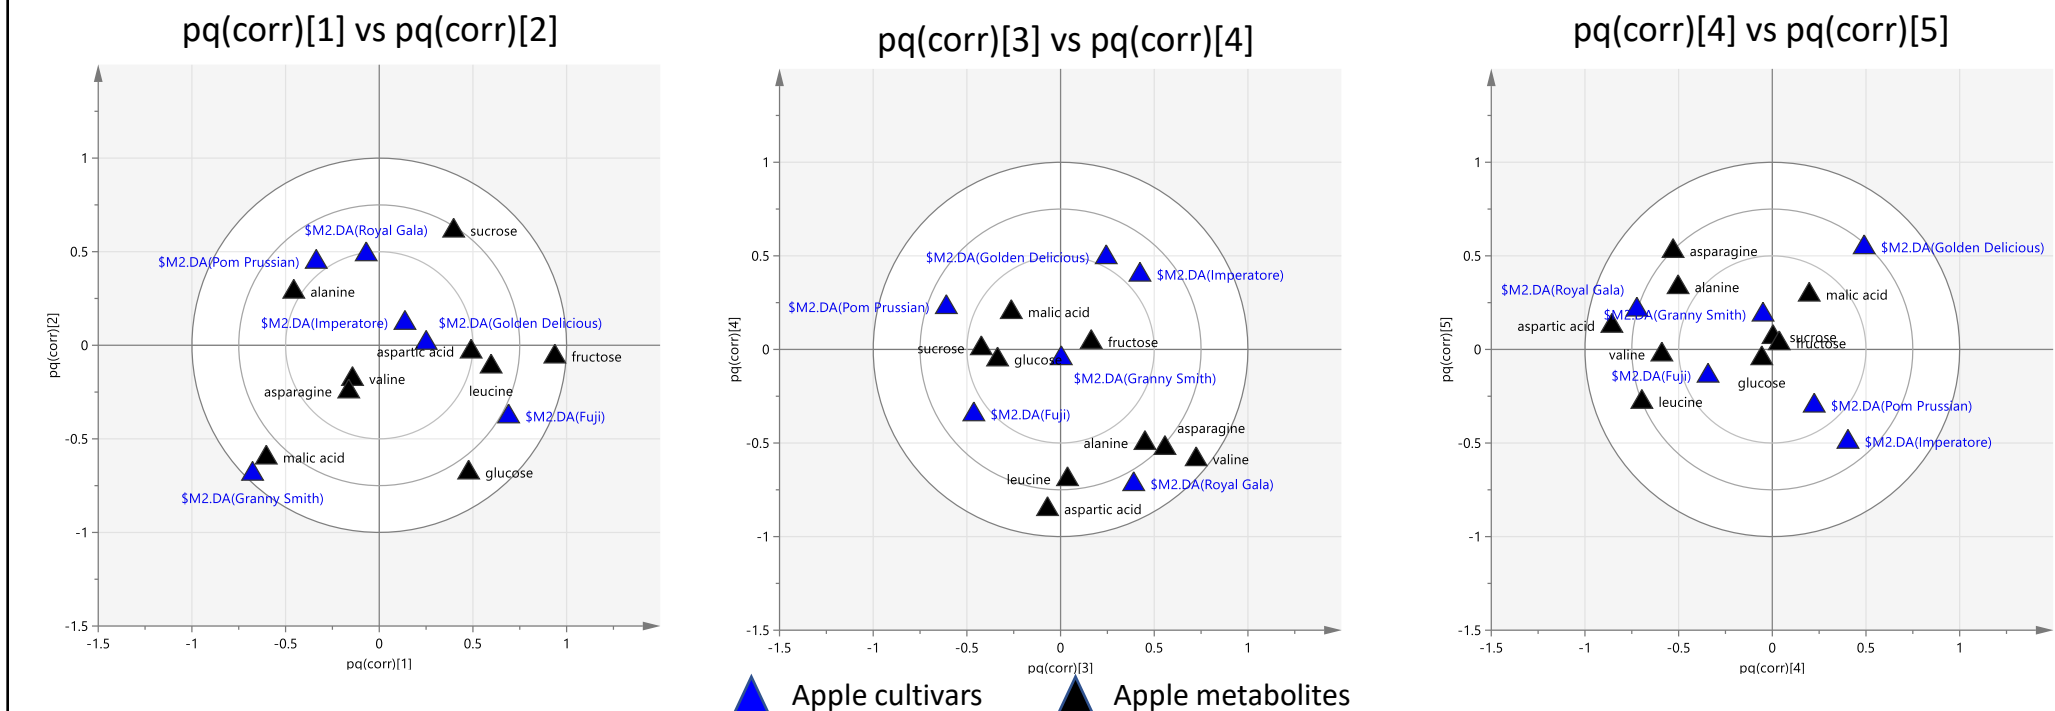

### c) Apples, HPLC-DAD dataset, O2PLS-DA score plots, 5+2 model

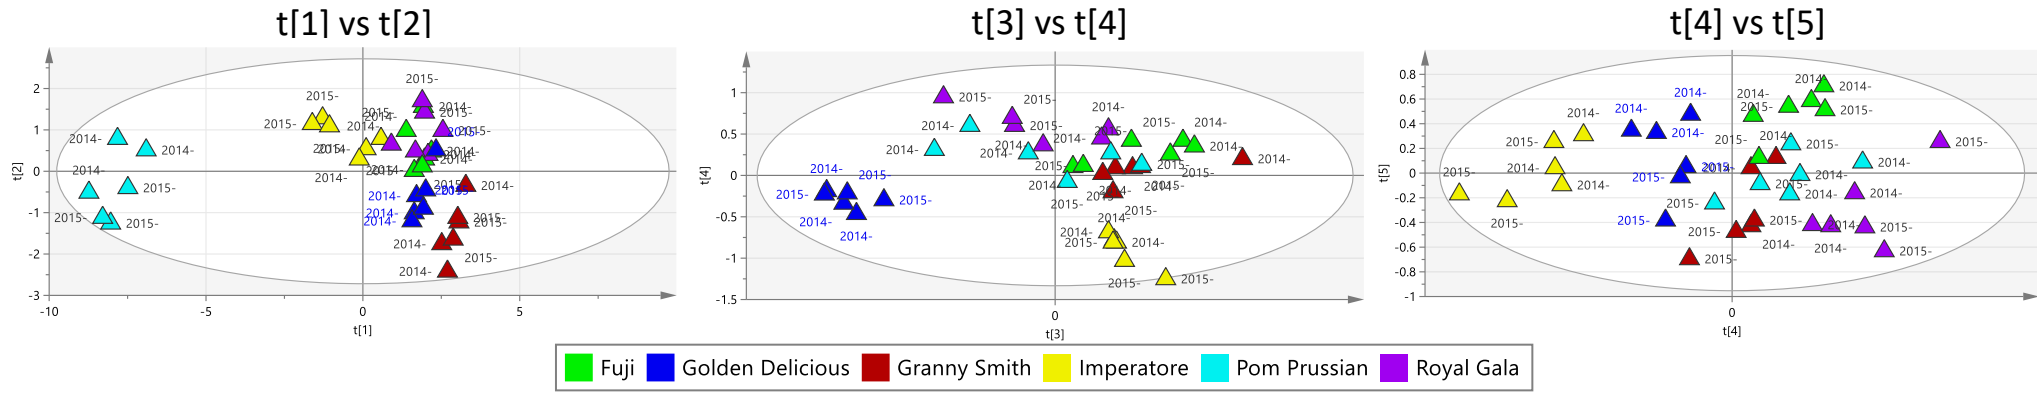

### d) Apples, HPLC-DAD dataset, O2PLS-DA loading plots, 5+2 model

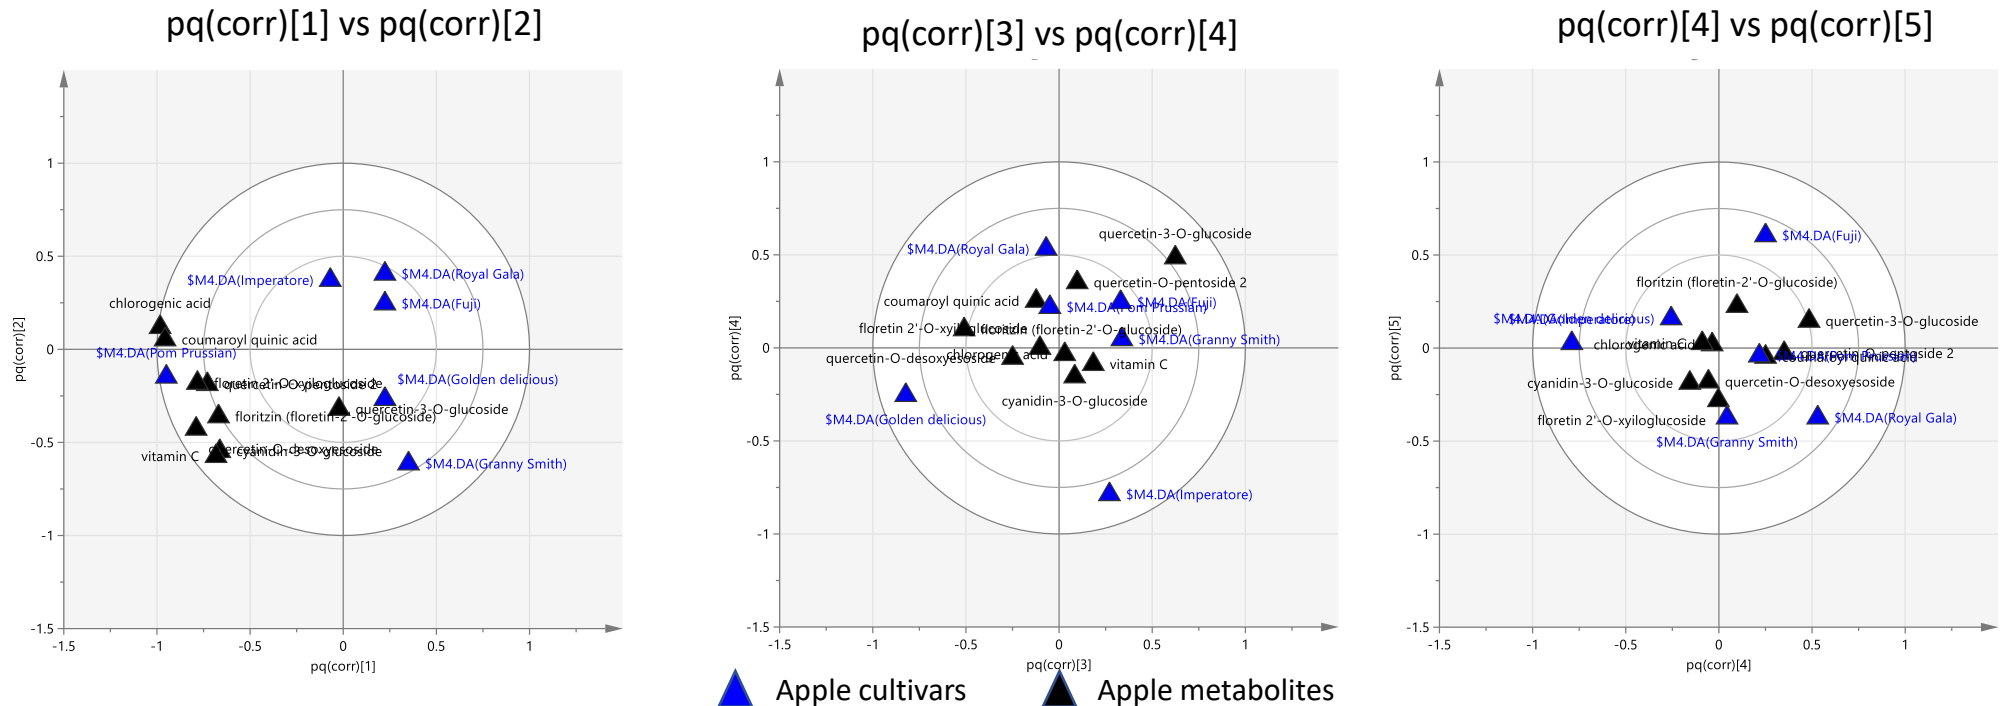

### e) Pears, NMR dataset, O2PLS-DA score plot, 5+3 model

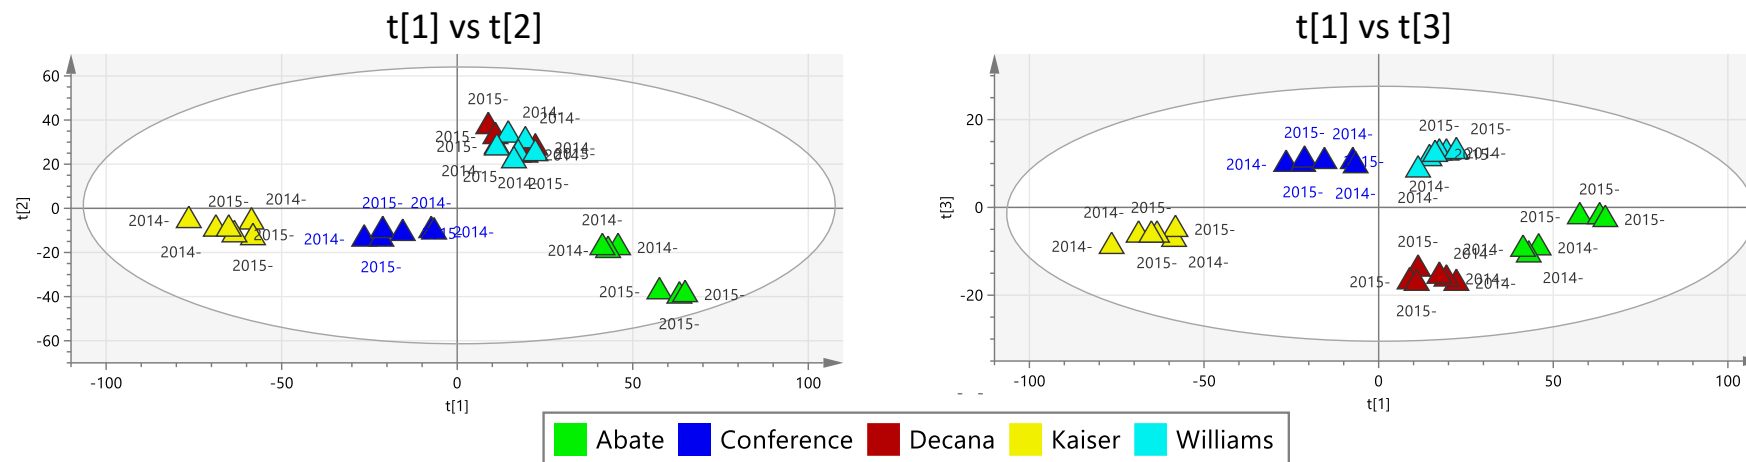

### f) Pears, NMR dataset, O2PLS-DA loading plot, 5+3 model

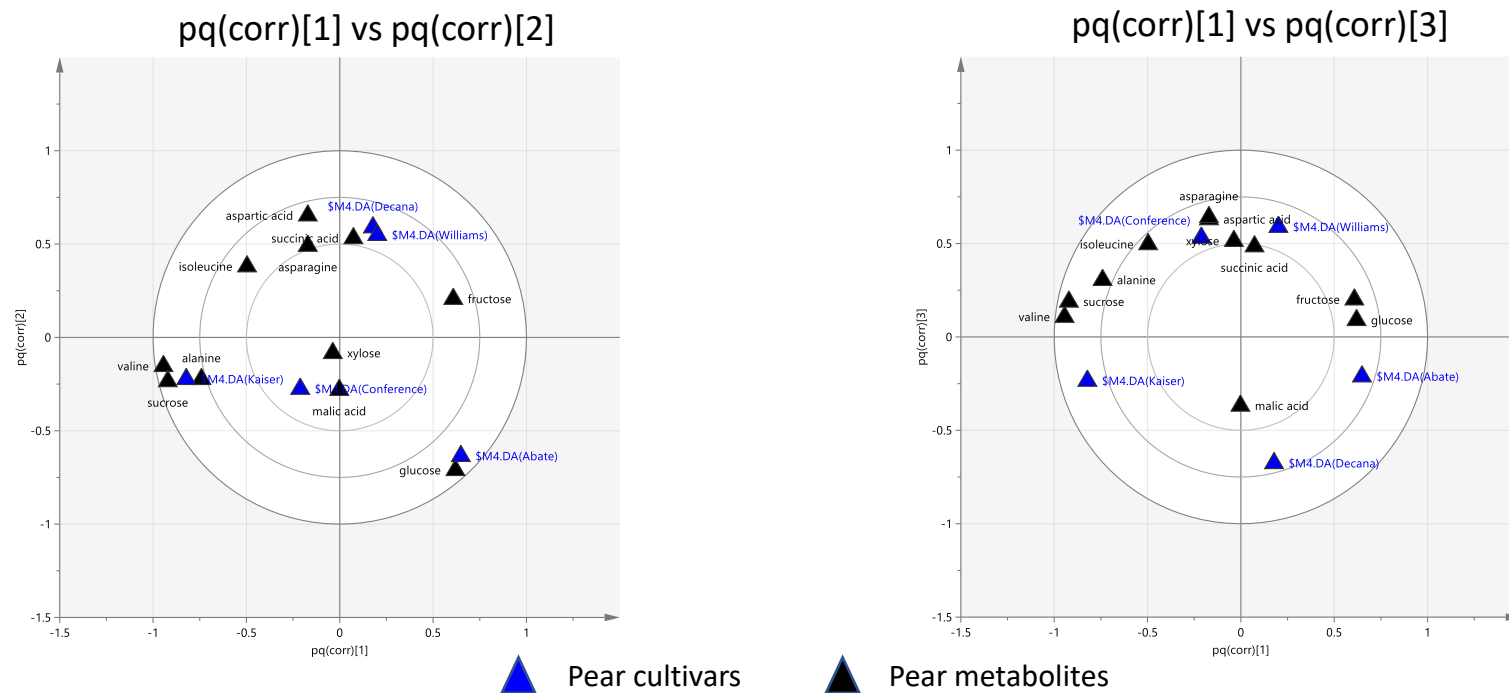

### g) Pears, HPLC-DAD dataset, O2PLS-DA score plot, 5+2 model

t[1] vs t[2]

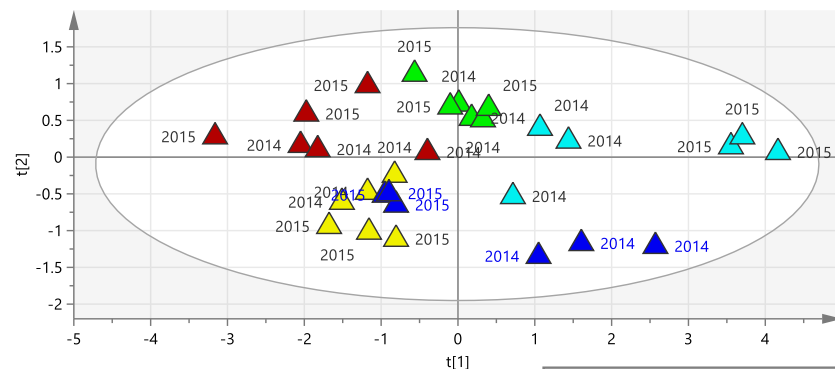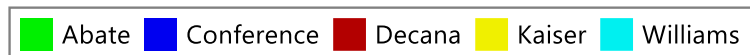

t[3] vs t[4]

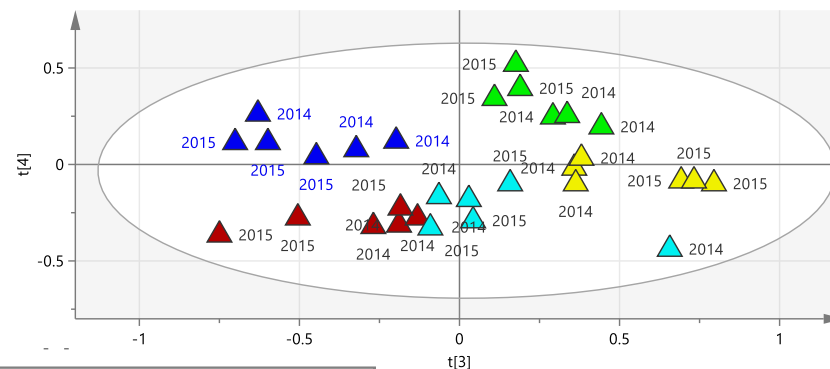

### h) Pears, HPLC-DAD dataset, O2PLS-DA loading plot, 5+2 model

pq(corr)[1] vs pq(corr)[2]

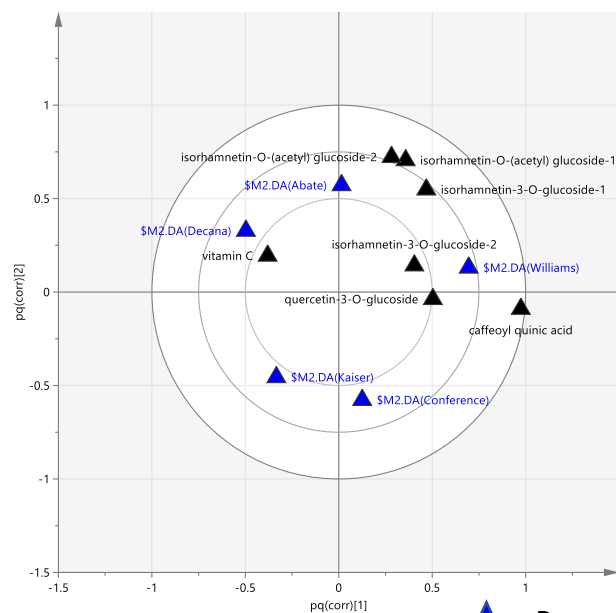

▲ Pear cultivars

▲ Pear metabolites

pq(corr)[3] vs pq(corr)[4]

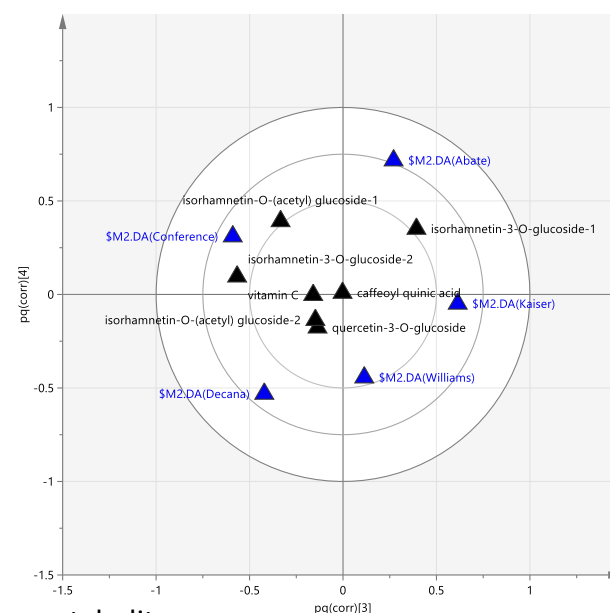

i) Pears, HPLC-DAD and NMR datasets, O2PLS-DA score plot, 1+1model

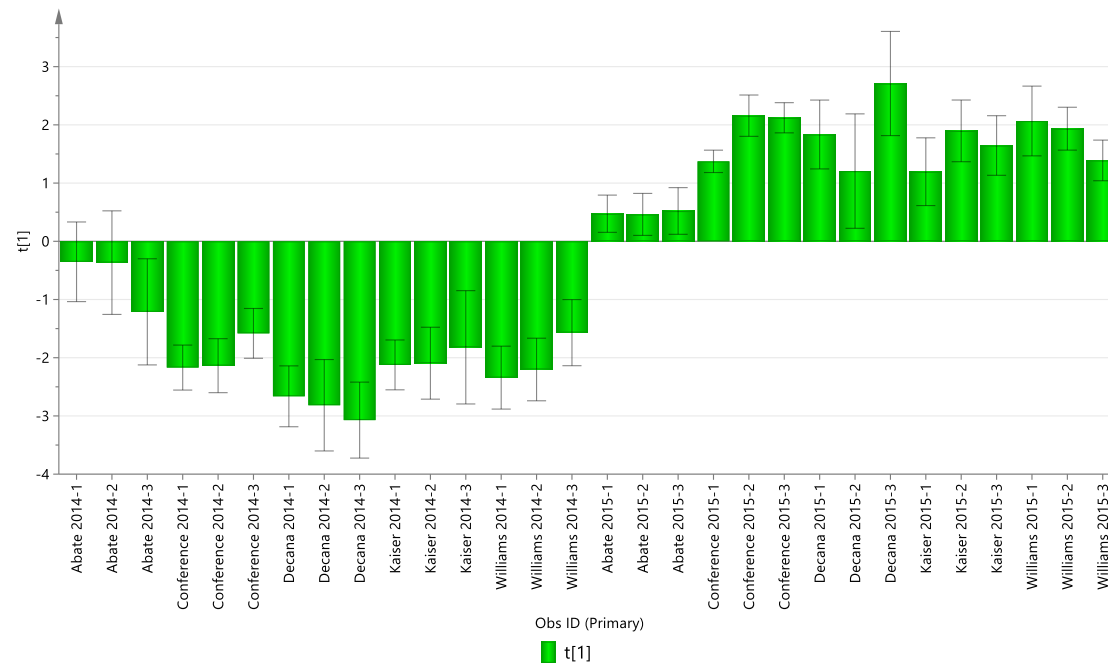

j) Pears, HPLC-DAD and NMR datasets, O2PLS-DA loading plot, 1+1model

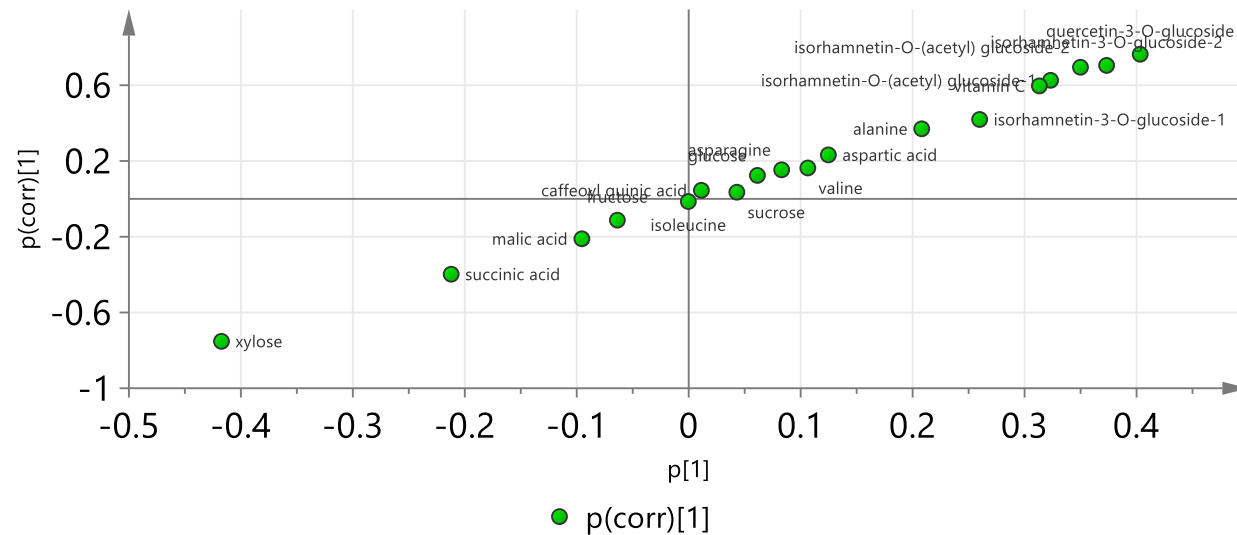

Supplement: s1 [file s1]
