# Supplementary material for: Metabolomic Profiling and Antioxidant Activity of Fruits Representing Diverse Apple and Pear Cultivars
Source: MDPI journal article supplement (doi:10.3390/biology10050380), 2021-04-28

# Figure S3. PCA of NMR-HPLC/DAD combined datamatrix

## a) Apples

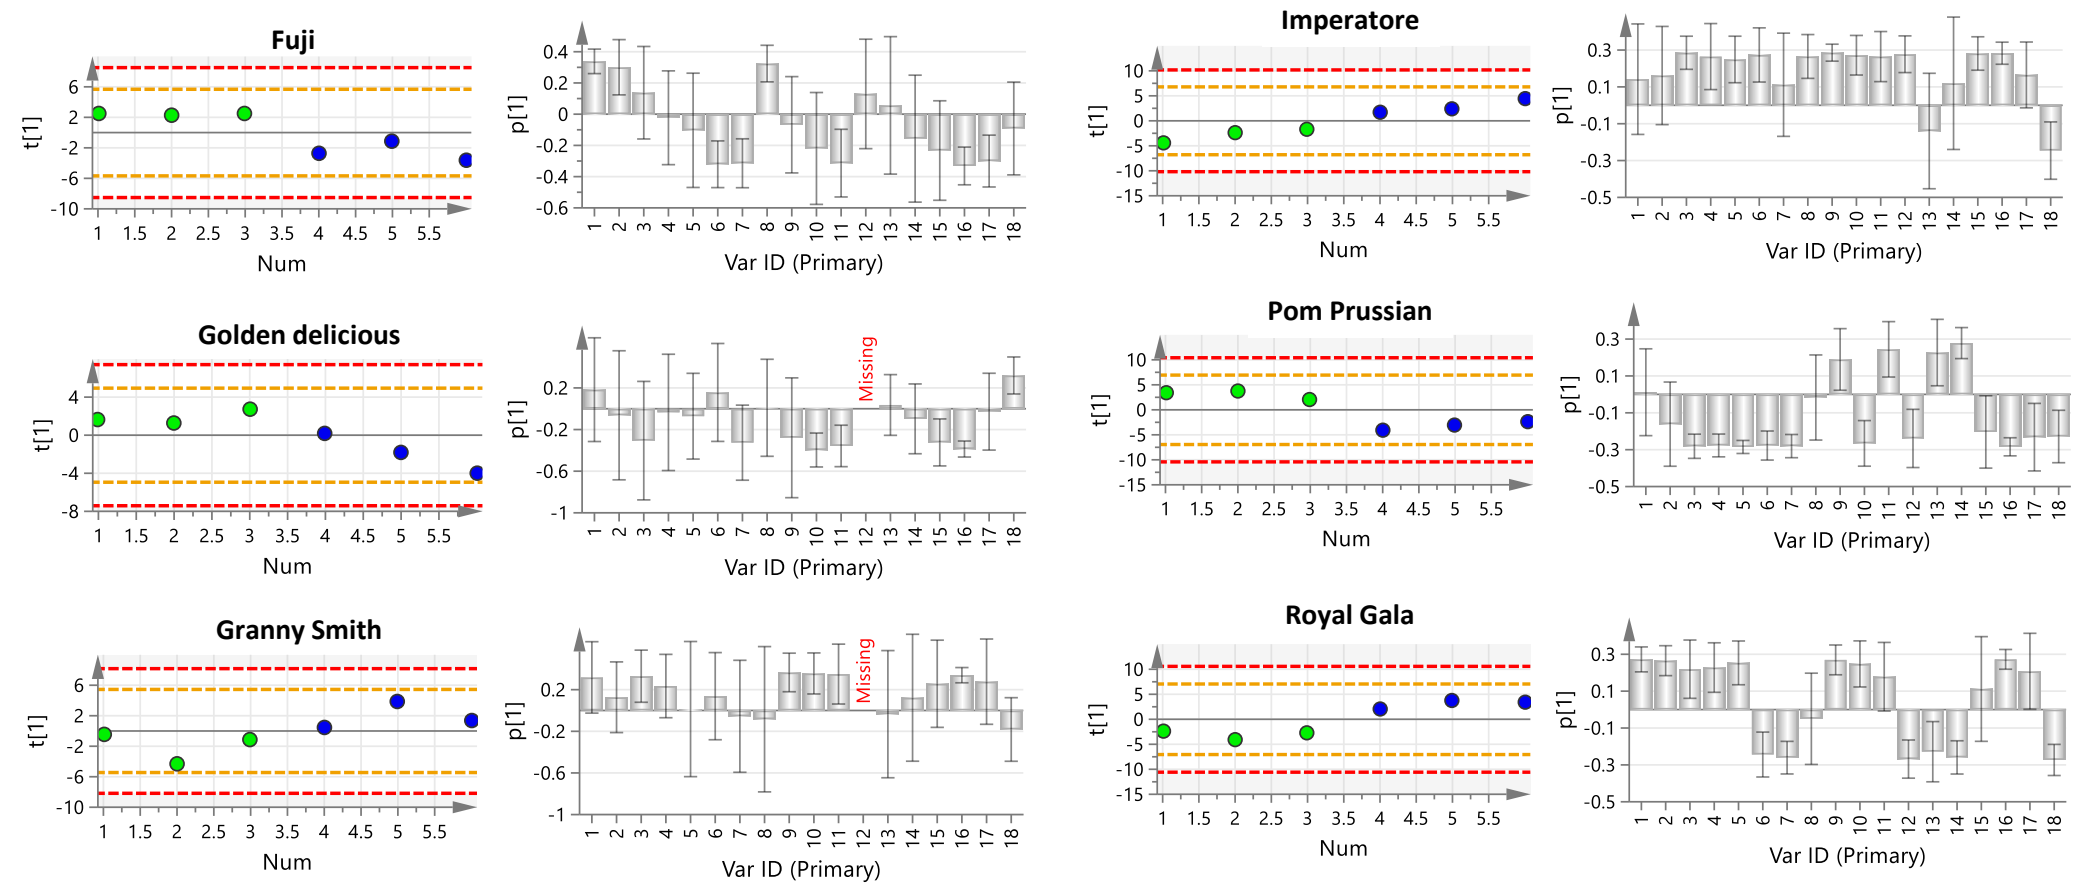

b) Pears

Abate Fetel

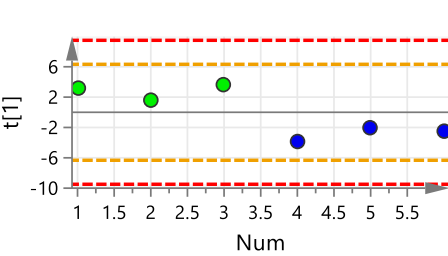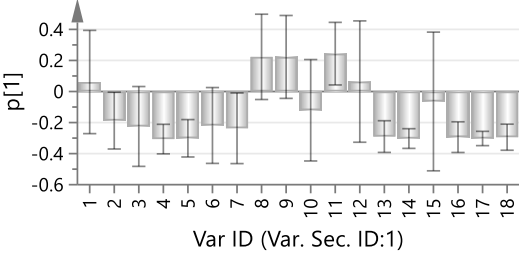

Kaiser

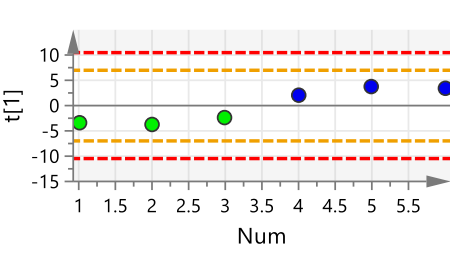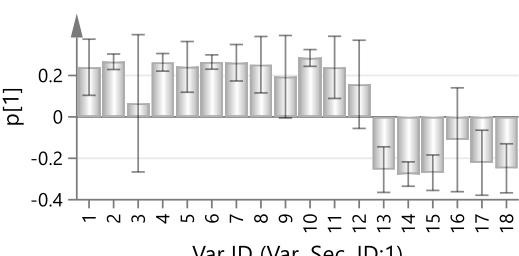

Conference

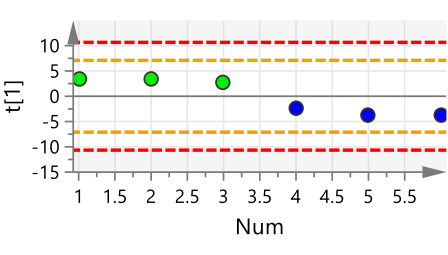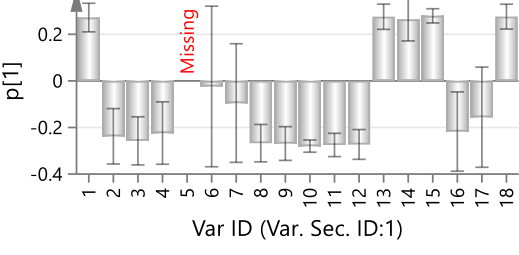

Williams

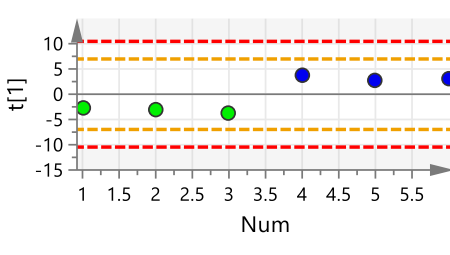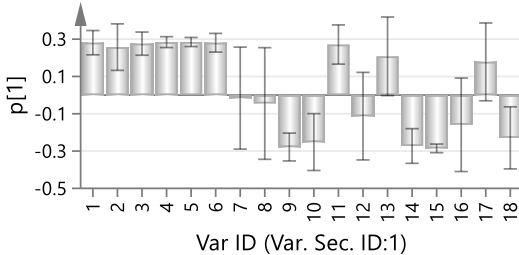

Decana del Comizio

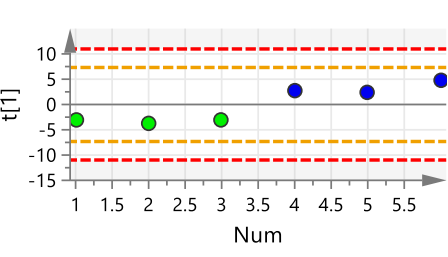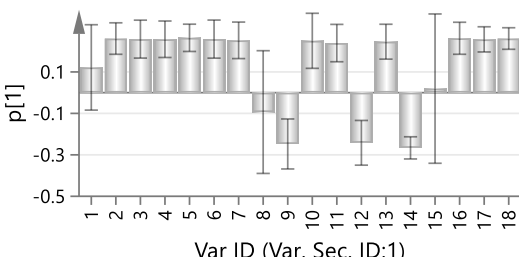

Var ID legend

|   |                                     |    |                                     |    |               |    |          |
|---|-------------------------------------|----|-------------------------------------|----|---------------|----|----------|
| 1 | caffeoyl quinic acid                | 6  | isorhamnetin-O-(acetyl) glucoside-2 | 11 | aspartic acid | 16 | glucose  |
| 2 | quercetin-3-O-glucoside             | 7  | unidentified                        | 12 | asparagine    | 17 | sucrose  |
| 3 | isorhamnetin-3-O-glucoside-1        | 8  | valine                              | 13 | malic acid    | 18 | fructose |
| 4 | isorhamnetin-3-O-glucoside-2        | 9  | isoleucine                          | 14 | succinic acid |    |          |
| 5 | isorhamnetin-O-(acetyl) glucoside-1 | 10 | alanine                             | 15 | xylose        |    |          |

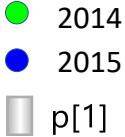

Supplement: s1 [file s1]
