# Supplementary material for: Metabolomic Profiling and Antioxidant Activity of Fruits Representing Diverse Apple and Pear Cultivars
Source: MDPI journal article supplement (doi:10.3390/biology10050380), 2021-04-28

Figure S1 - Unsupervised PCA of agronomic data for apples and pears

a) Score plots showing cultivars (top row) and growing seasons (bottom row)

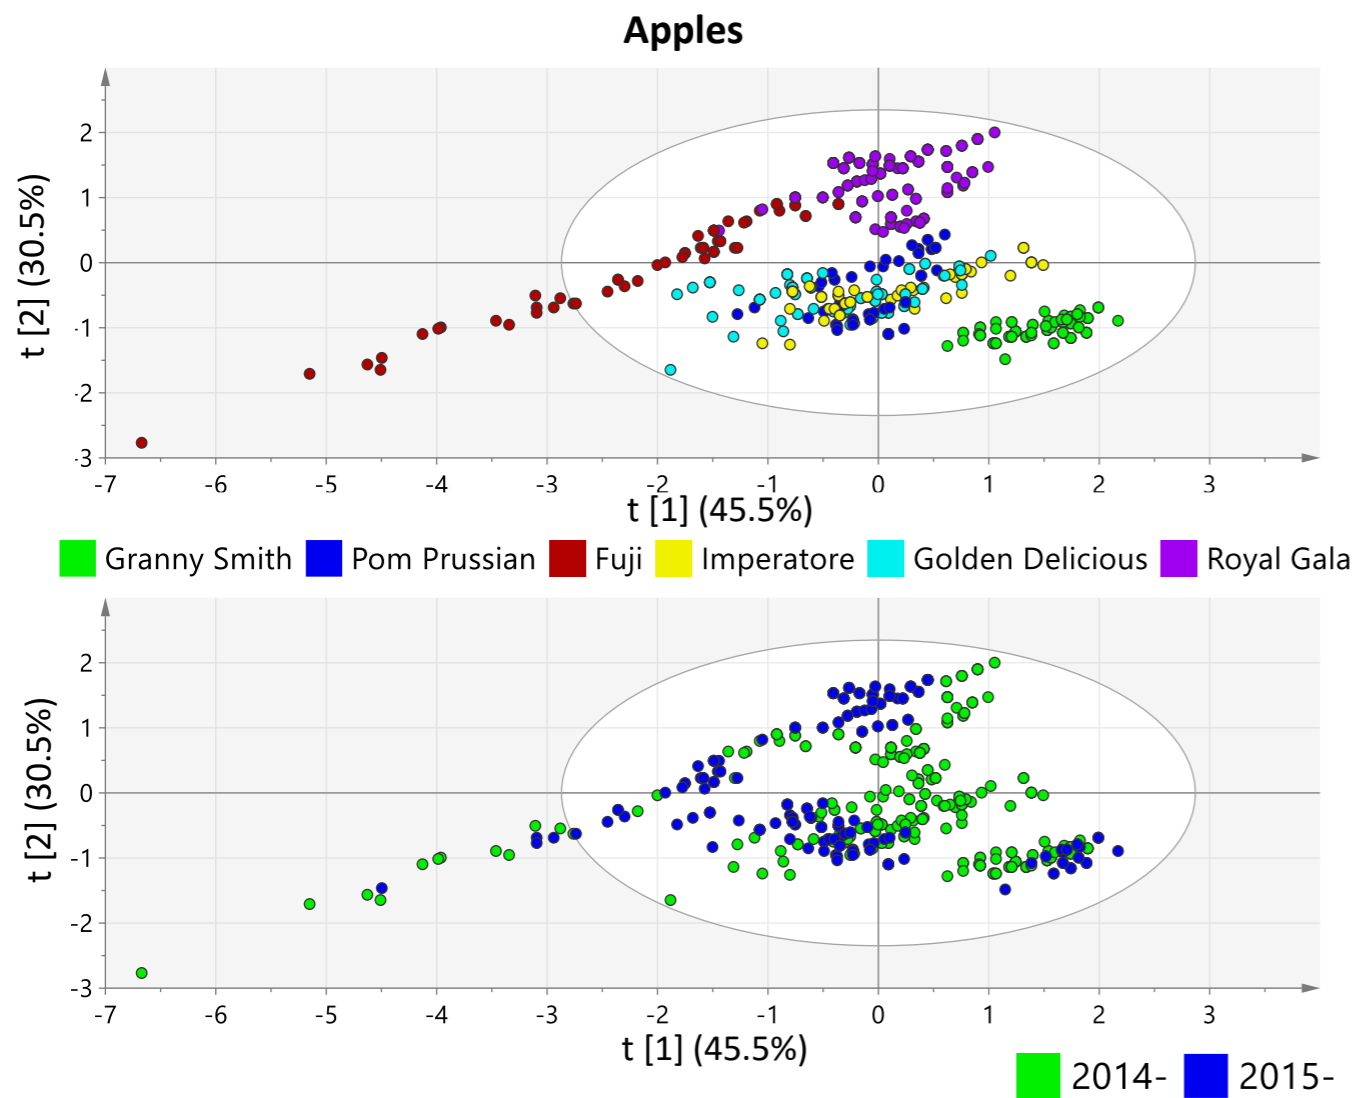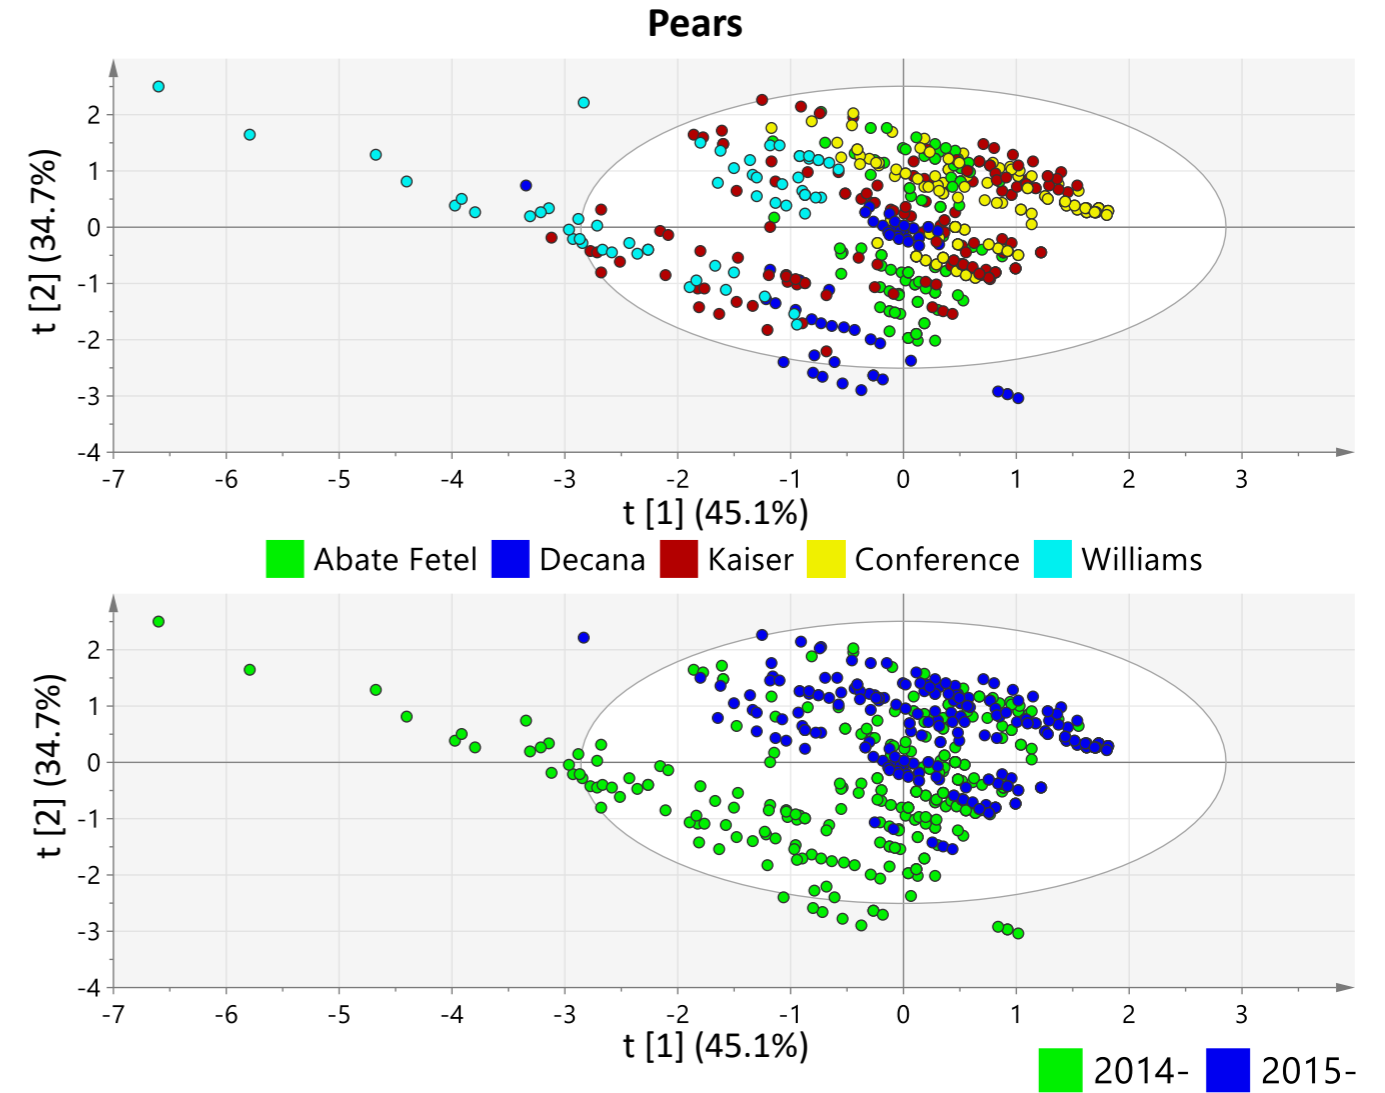

b) Loading plots leading sample separation

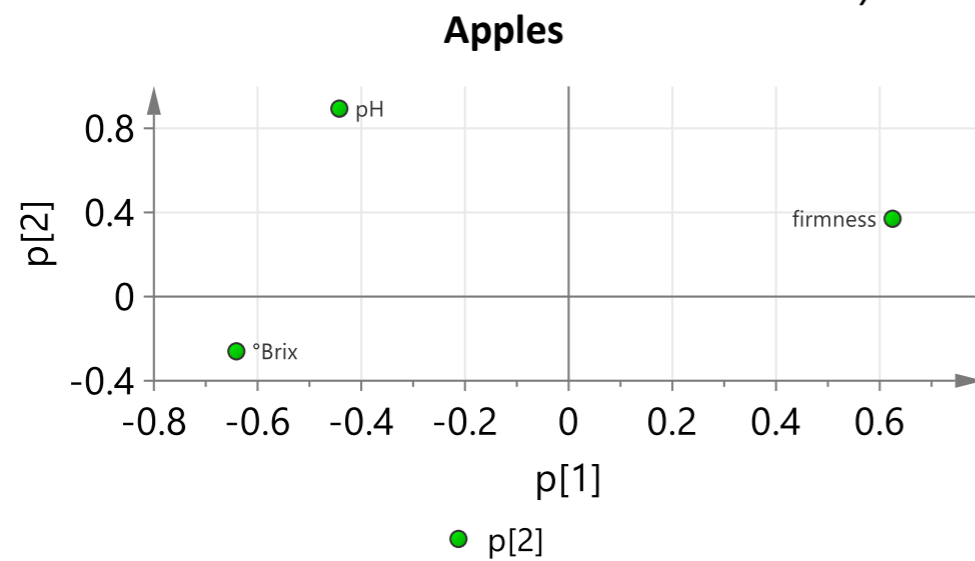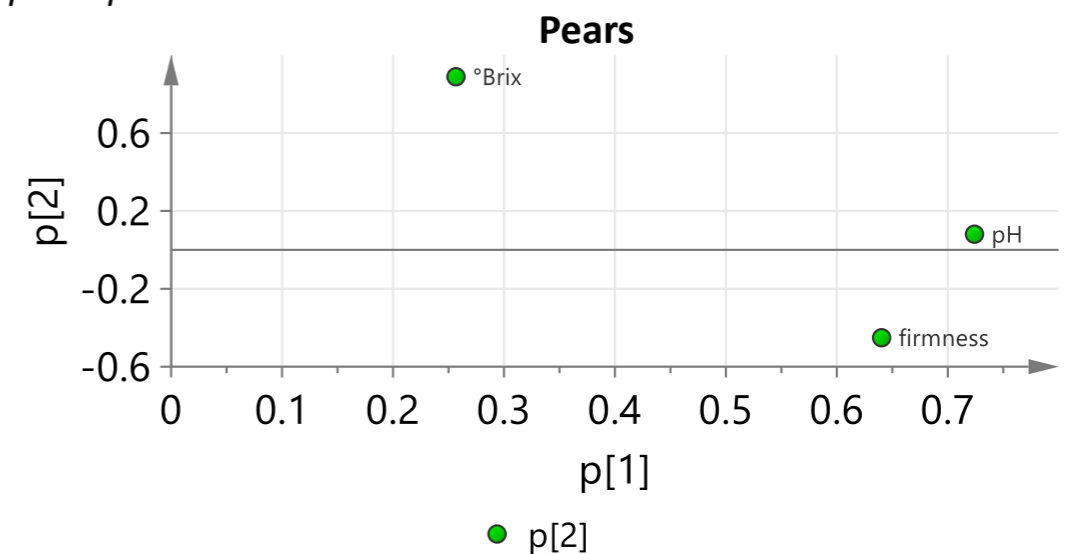

Supplement: s1 [file s1]
