# Supplementary material for: Metabolomic Profiling and Antioxidant Activity of Fruits Representing Diverse Apple and Pear Cultivars
Source: Biology (Basel). 2021 Apr 28;10(5):380. doi: 10.3390/biology10050380 (PMC8145694; doi:10.3390/biology10050380)
Supplement: Supplementary file 1 [file biology-10-00380-s001.zip]

Archive with 5 entries (5 files):
- Figure S1.pdf
- Figure S2.pdf
- Figure S3.pdf
- File S1.xlsx
- Table S1.xlsx
