# Supplementary material for: Metabolomic Profiling and Antioxidant Activity of Fruits Representing Diverse Apple and Pear Cultivars
Source: Biology (Basel). 2021 Apr 28;10(5):380. doi: 10.3390/biology10050380 (PMC8145694; doi:10.3390/biology10050380)
Supplement: Supplementary file 1 [file biology-10-00380-s001.zip › File S1.xlsx]

## Sheet: apple
Metabolite content is calulated from the Areas of chromatographic peaks and expresdsed as Intensity, in arbitrary units
		antioxidant activity (mmol TE/Kg FW)	FRAP						2.60554	2.36453	2.39292	2.17808	2.37598	0.662025	3.28748	2.89147	2.6713	2.10598	2.2682	2.42548	3.0303	3.53818	2.31401	3.04243	3.78848	2.69818	3.0511	2.62	2.56433	3.25332	3.61844	3.01122	7.36331	6.72996	5.75949	4.42627	5.21973	5.25141	2.31669	2.23112	2.03492	2.67292	2.47805	2.24091
									2014	2014	2014	2015	2015	2015	2014	2014	2014	2015	2015	2015	2014	2014	2014	2015	2015	2015	2014	2014	2014	2015	2015	2015	2014	2014	2014	2015	2015	2015	2014	2014	2014	2015	2015	2015
				OPLS	OPLS-DA	OPLS-DA	OPLS-DA	OPLS-DA	Fuji	Fuji	Fuji	Fuji	Fuji	Fuji	Golden delicious	Golden delicious	Golden delicious	Golden delicious	Golden delicious	Golden delicious	Granny Smith	Granny Smith	Granny Smith	Granny Smith	Granny Smith	Granny Smith	Imperatore	Imperatore	Imperatore	Imperatore	Imperatore	Imperatore	Pom Prussian	Pom Prussian	Pom Prussian	Pom Prussian	Pom Prussian	Pom Prussian	Royal Gala	Royal Gala	Royal Gala	Royal Gala	Royal Gala	Royal Gala
m/z (-)	rt	Putative identification	metabolite class	pq(corr)	pq(corr)1	pq(corr)2	pq(corr)3	pq(corr)4	Fuji 2014-1	Fuji 2014-2	Fuji 2014-3	Fuji 2015-1	Fuji 2015-2	Fuji 2015-3	Golden 2014-1	Golden 2014-2	Golden 2014-3	Golden 2015-1	Golden 2015-2	Golden 2015-3	Granny Smith 2014-1	Granny Smith 2014-2	Granny Smith 2014-3	Granny Smith 2015-1	Granny Smith 2015-2	Granny Smith 2015-3	Imperatore 2014-1	Imperatore 2014-2	Imperatore 2014-3	Imperatore 2015-1	Imperatore 2015-2	Imperatore 2015-3	Prussiana 2014-1	Prussiana 2014-2	Prussiana 2014-3	Prussiana 2015-1	Prussiana 2015-2	Prussiana 2015-3	Royal Gala 2014-1	Royal Gala 2014-2	Royal Gala 2014-3	Royal Gala 2015-1	Royal Gala 2015-2	Royal Gala 2015-3
402.917	18.9328	Caffeic acid derivative	hydroxycinnamic acids	-0.144771	0.034598	0.206517	0.499457	-0.485628	1.40265e+06	1.3225e+06	1.3279e+06	1.57707e+06	2.29567e+06	2.36643e+06	1.86227e+06	1.51365e+06	2.05242e+06	2.18263e+06	2.50294e+06	2.97262e+06	1.30308e+06	1.85145e+06	1.26712e+06	1.21167e+06	1.23475e+06	1.09387e+06	2.87622e+06	2.45725e+06	1.63282e+06	5.40571e+06	6.69202e+06	6.18789e+06	979904	414311	1.24947e+06	1.40428e+06	2.13624e+06	1.6216e+06	1.92361e+06	1.31308e+06	1.57851e+06	3.20044e+06	2.84405e+06	3.16885e+06
340.877	5.83734	Caffeic acid hexose	hydroxycinnamic acids	0.337952	-0.301608	0.229824	-0.174047	-0.236917	1.19408e+06	1.09312e+06	657676	740321	913971	1.37435e+06	1.68616e+06	1.66793e+06	998494	1.23496e+06	920667	1.40996e+06	986594	1.18604e+06	864398	702885	485845	228653	2.08586e+06	1.33793e+06	411911	1.21557e+06	996068	773508	1.12623e+06	526013	1.70264e+06	2.40527e+06	2.78903e+06	494354	783818	1.63473e+06	0	1.42617e+06	1.01016e+06	1.88575e+06
341.877	4.85355	Caffeic acid hexose	hydroxycinnamic acids	0.22102	-0.41627	0.228278	0.140267	-0.040773	426069	691772	202735	823370	868381	1.06083e+06	293063	201926	1.16022e+06	341886	174902	1.25532e+06	253681	524643	540150	347044	272653	232201	890318	270091	1.36635e+06	515413	1.01505e+06	1.61542e+06	1.68629e+06	650771	877105	1.25275e+06	534743	915792	585804	498945	0	677380	1.03882e+06	1.091e+06
352.837	15.07	Caffeoyl quinic acid	hydroxycinnamic acids	0.763552	-0.862351	0.3262	0.0695426	0.0639362	6.17311e+07	6.77051e+07	6.80405e+07	5.49105e+07	4.87573e+07	6.25027e+07	4.35282e+07	4.94747e+07	5.21571e+07	4.08417e+07	5.04161e+07	5.72017e+07	3.79328e+07	4.54666e+07	3.84328e+07	3.18741e+07	2.95893e+07	2.41766e+07	4.99188e+07	6.53378e+07	6.6477e+07	7.82541e+07	7.26232e+07	6.98379e+07	1.06425e+08	1.0503e+08	9.73566e+07	8.33762e+07	7.8861e+07	9.51781e+07	4.41075e+07	4.7945e+07	4.4068e+07	6.40271e+07	6.64421e+07	6.18708e+07
350.91	14.7514	Caffeoyl quinic acid	hydroxycinnamic acids	-0.0541788	-0.113502	0.551746	0.541158	0.0211957	1.95606e+07	2.43052e+07	2.19926e+07	1.61481e+07	1.60249e+07	1.70641e+07	8.99828e+06	1.21437e+07	1.23644e+07	4.69044e+06	6.57446e+06	3.78745e+06	5.33546e+06	5.32406e+06	6.05736e+06	4.44475e+06	4.28979e+06	4.42302e+06	1.96591e+07	1.67391e+07	2.22831e+07	1.65644e+07	1.59909e+07	1.56267e+07	1.18194e+07	9.42166e+06	7.72399e+06	9.2466e+06	1.11185e+07	1.06622e+07	7.28721e+06	8.57138e+06	7.63108e+06	4.30174e+06	3.88714e+06	5.37597e+06
352.841	13.1454	Chlorogenic acid	hydroxycinnamic acids	0.81845	-0.939934	0.299457	0.037783	-0.103238	1.89971e+08	2.10152e+08	2.09781e+08	2.16156e+08	2.04063e+08	1.82857e+08	1.79718e+08	1.9639e+08	1.92291e+08	1.77854e+08	1.85423e+08	1.90069e+08	1.29124e+08	1.47542e+08	1.23886e+08	1.3883e+08	1.36587e+08	1.21073e+08	2.42518e+08	2.30948e+08	2.39729e+08	2.7286e+08	2.71364e+08	2.47374e+08	3.50541e+08	3.23319e+08	3.53825e+08	3.40737e+08	3.71733e+08	3.1829e+08	1.76977e+08	1.70493e+08	1.75363e+08	1.94818e+08	1.96918e+08	1.73147e+08
354.851	13.1078	Chlorogenic acid	hydroxycinnamic acids	0.498699	-0.487078	0.0812123	-0.0608015	-0.0727446	1.07064e+06	1.843e+06	2.14197e+06	2.45458e+06	2.56945e+06	3.69147e+06	1.01703e+06	4.40051e+06	5.86086e+06	666229	2.18783e+06	857881	1.80952e+06	1.84618e+06	955036	1.56383e+06	1.34889e+06	2.8002e+06	2.43078e+06	2.54301e+06	1.6141e+06	3.57325e+06	3.14215e+06	3.20273e+06	1.54119e+06	7.44519e+06	3.79906e+06	4.4935e+06	4.69387e+06	2.83034e+06	5.07426e+06	3.28165e+06	1.63896e+06	1.89762e+06	3.01161e+06	1.88616e+06
514.835	12.508	Caffeoyl quinic acid hexose	hydroxycinnamic acids	0.541124	-0.58418	0.0658751	0.490048	-0.153484	545633	496571	272847	203838	459033	265259	321202	288299	156556	119800	190904	283726	331573	355211	263511	413654	174101	331865	952005	1.05205e+06	682928	2.08953e+06	671664	576850	904135	1.62115e+06	702649	909437	440195	589808	247917	110369	182433	468912	197648	365364
190.73	13.1225	Caffeoyl quinic acid hexose, fragment	hydroxycinnamic acids	0.488797	-0.335369	0.258968	0.122722	0.0267315	8.96882e+06	4.48881e+06	6.68832e+06	6.65109e+06	4.06048e+06	2.05307e+06	3.13863e+06	3.82463e+06	4.58324e+06	3.62866e+06	4.36721e+06	8.01521e+06	5.84681e+06	5.35862e+06	2.36139e+06	2.48571e+06	4.10767e+06	2.18089e+06	4.60327e+06	7.64562e+06	7.52377e+06	3.11495e+06	7.29276e+06	5.36398e+06	4.45331e+06	6.25408e+06	8.17091e+06	8.24195e+06	2.08405e+06	9.0985e+06	6.12858e+06	4.19225e+06	3.0172e+06	5.26557e+06	4.1444e+06	4.77224e+06
190.736	15.1639	Caffeoyl quinic acid hexose, fragment	hydroxycinnamic acids	0.4576	-0.552928	0.113501	0.0881123	-0.258566	323082	1.5643e+06	246547	565018	722310	872776	494630	272028	908216	251086	1.18122e+06	990749	450171	334134	464009	368403	521960	301514	590022	494694	1.15935e+06	2.893e+06	886417	618789	1.40006e+06	1.15162e+06	715529	1.92409e+06	2.84316e+06	816901	772107	533341	682566	861616	814245	496328
178.709	13.6825	Caffeoyl quinic acid hexose, fragment	hydroxycinnamic acids	0.271599	-0.399741	-0.131691	0.0769876	-0.0628556	288171	547366	247952	233676	455342	222652	151178	629474	457677	277222	541756	226502	479585	850566	622456	367295	234027	217750	1.03086e+06	195046	834589	397816	500742	187811	152188	1.17547e+06	418718	1.69627e+06	384998	488074	240391	246793	175823	312765	531926	496447
336.852	15.7974	Coumaroyl quinic acid	hydroxycinnamic acids	0.911867	-0.941034	0.0724799	-0.261615	0.115345	1.78885e+07	1.74191e+07	1.86589e+07	2.1571e+07	1.96802e+07	2.14363e+07	3.14157e+07	3.41769e+07	3.26897e+07	2.06946e+07	1.65009e+07	2.11261e+07	6.94588e+06	7.40759e+06	5.28294e+06	8.04737e+06	1.05275e+07	9.44349e+06	2.84439e+07	2.92761e+07	3.27272e+07	3.01599e+07	3.00514e+07	3.04798e+07	1.43937e+08	1.54928e+08	1.50231e+08	1.20931e+08	1.27341e+08	1.28684e+08	3.61583e+07	3.61995e+07	3.66325e+07	3.616e+07	3.3797e+07	3.28837e+07
336.849	17.0733	Coumaroyl quinic acid	hydroxycinnamic acids	0.687571	-0.753806	0.312278	0.125308	0.290405	3.93459e+06	2.28925e+06	2.45622e+06	3.06773e+06	3.07974e+06	2.65492e+06	215287	1.28217e+06	1.38139e+06	310581	1.08414e+06	645205	671109	319308	568840	1.30123e+06	178377	339402	1.99099e+06	1.09336e+06	1.19433e+06	4.0615e+06	2.33884e+06	1.66504e+06	3.59379e+06	5.95884e+06	3.25703e+06	6.01031e+06	3.41555e+06	4.78617e+06	1.35145e+06	1.3725e+06	1.27065e+06	2.35334e+06	2.25159e+06	1.8555e+06
626.655	15.5364	Coumaroyl quinic acid + epicatechin, adduct	hydroxycinnamic acids	0.761397	-0.854367	0.277427	0.254582	0.116777	9.03737e+06	9.3971e+06	1.27299e+07	1.52823e+07	1.3784e+07	1.3214e+07	4.624e+06	5.90684e+06	7.39968e+06	3.11553e+06	2.61311e+06	2.50858e+06	3.18843e+06	3.21179e+06	1.29906e+06	3.29529e+06	2.60933e+06	3.09337e+06	1.22361e+07	1.37096e+07	8.24104e+06	1.9172e+07	1.67102e+07	1.80626e+07	1.95766e+07	2.80448e+07	1.83651e+07	2.03331e+07	1.97022e+07	2.79436e+07	5.60978e+06	4.27365e+06	6.04299e+06	8.34392e+06	7.21193e+06	8.37173e+06
515.984	17.5812	Dicaffeoyl quinic acid	hydroxycinnamic acids	0.910594	-0.802598	-0.0395171	-0.135159	-0.0114305	54874.6	369258	39957.4	176654	220636	47960.2	75548.5	108191	52638.5	108720	89051	196939	209002	106091	102919	84494.9	142900	67785.1	237172	88677.8	220230	104480	162370	212291	1.21963e+06	2.20206e+06	286031	1.27775e+06	1.52982e+06	504978	56954.3	95056.6	61011.7	55506	83429.2	56677
514.812	21.5746	Dicaffeoyl quinic acid	hydroxycinnamic acids	0.812207	-0.673405	-0.0307464	-0.445926	-0.0723336	514701	442729	756706	341796	783423	1.25044e+06	1.99111e+06	4.10015e+06	1.85304e+06	1.05047e+06	1.91247e+06	969085	604530	846889	462642	567766	245641	601670	875336	1.10214e+06	526377	538906	669665	385181	2.13909e+06	5.16304e+06	2.90702e+06	3.2196e+06	1.97175e+06	3.22495e+06	537509	338673	614988	1.17002e+06	343629	474397
514.956	17.5335	Dicaffeoyl quinic acid	hydroxycinnamic acids	0.725754	-0.926308	-0.0450572	-0.232598	0.0906796	332289	144663	134410	259250	355899	215319	110025	196691	137746	248844	554917	513097	225787	212907	279200	64199.8	191457	120853	210450	256161	525523	270013	331771	777723	3.12237e+06	5.1513e+06	6.58521e+06	5.7199e+06	5.16381e+06	4.88927e+06	88325.4	176254	77726.3	117505	104667	104533
515.784	21.6471	Dicaffeoyl quinic acid, isotope	hydroxybenzoic acids	0.513514	-0.432757	-0.0564825	-0.364002	-0.124504	513182	330105	364189	192535	387192	149177	231665	1.45448e+06	717914	293205	606735	242350	393820	150132	166550	318397	276087	189542	320542	246229	157922	229527	236876	236330	367677	1.18655e+06	377402	388933	771877	1.09208e+06	194426	155746	139321	218686	98845.1	228049
516.909	21.3369	Dicaffeoyl quinic acid, isotope	hydroxycinnamic acids	0.106576	-0.109367	0.0179076	-0.417653	-0.55943	322279	377447	832154	1.06139e+06	1.15269e+06	1.51531e+06	1.35867e+06	1.76991e+06	1.33213e+06	3.58189e+06	4.70967e+06	4.00329e+06	1.07121e+06	935029	996419	670552	998759	1.27758e+06	1.43217e+06	667525	845952	1.49567e+06	2.23528e+06	1.62406e+06	1.76593e+06	1.23135e+06	675494	1.98492e+06	2.74002e+06	2.0028e+06	750693	550340	395864	1.37997e+06	1.20931e+06	1.33601e+06
314.847	5.97266	Dihydroxybenzoic acid - O - hexoside	hydroxybenzoic acids	0.564953	-0.486607	-0.229817	-0.393819	-0.190717	180547	319891	369635	207897	133481	207542	849759	1.81791e+06	1.63549e+06	190724	595249	390471	273384	680268	1.08094e+06	405959	572908	351959	315903	690124	618012	409586	399544	185145	803054	741571	1.1627e+06	1.6573e+06	1.42099e+06	1.09486e+06	376025	315311	263831	463040	141627	936324
386.801	15.2798	Hydroxyferuloyl quinic acid	hydroxycinnamic acids	0.161897	-0.0952813	-0.348977	0.462139	-0.0226597	175490	971977	450550	573886	251057	422176	365233	475038	429911	313815	322555	286406	520920	1.05865e+06	494777	471978	1.3037e+06	864125	575157	438899	286635	711619	1.08847e+06	1.38734e+06	792798	604999	321327	610956	437665	707185	360934	596975	374900	455599	690441	1.04367e+06
114.732	4.7197	Malic acid	other organic acids	0.0829061	0.217813	-0.573257	-0.0357872	0.111865	1.19335e+06	560389	443152	726573	257990	506590	505248	942959	497501	330183	746173	1.08335e+06	393141	1.70389e+06	1.97525e+06	1.1381e+06	2.09324e+06	732063	210594	640036	372821	429250	766028	114409	464877	209433	234067	791447	714415	1.08196e+06	524070	1.16757e+06	275676	480025	402919	808681
132.711	5.10003	Malic acid	other organic acids	-0.0554434	0.0612247	-0.533795	-0.252366	-0.0967646	568910	742256	316212	969237	1.32407e+06	196382	783609	539149	1.66334e+06	592130	1.47938e+06	1.92822e+06	2.79507e+06	903209	1.00462e+06	2.3621e+06	1.4335e+06	1.07942e+06	345791	471866	578383	570918	717406	571027	926265	960955	728130	1.49749e+06	958435	1.02904e+06	545658	1.10522e+06	817429	639594	579000	314380
172.702	15.7477	Shikimic acid, fragment	other organic acids	0.911307	-0.913412	-0.000145543	-0.296281	0.14381	785809	639171	1.19761e+06	1.38076e+06	621276	500994	1.60847e+06	1.35443e+06	1.8927e+06	1.49907e+06	1.08308e+06	1.25869e+06	285352	993743	380035	809550	368229	620193	697943	1.14536e+06	1.58147e+06	616361	1.44048e+06	632356	1.21103e+07	1.23014e+07	8.98486e+06	1.04983e+07	9.09438e+06	8.95631e+06	1.67825e+06	956343	1.86452e+06	2.12073e+06	3.55444e+06	2.1002e+06
706.862	13.1456	Caffeoyl quinic acid, 2M-1 adduct	hydroxycinnamic acids	0.898213	-0.982552	0.153792	0.0672087	-0.036598	2.13404e+08	2.2002e+08	2.03871e+08	2.4081e+08	2.17294e+08	2.15081e+08	1.9008e+08	1.94239e+08	1.75859e+08	1.26664e+08	1.26573e+08	1.55139e+08	1.07907e+08	1.33376e+08	8.76424e+07	1.0151e+08	1.01202e+08	7.73021e+07	3.31471e+08	3.27696e+08	3.11683e+08	3.82327e+08	3.91025e+08	3.91972e+08	6.34925e+08	7.1371e+08	6.8371e+08	6.6896e+08	6.65258e+08	5.61277e+08	1.33619e+08	1.35814e+08	1.39017e+08	1.74566e+08	1.59125e+08	1.66644e+08
707.752	15.0898	Caffeoyl quinic acid, 2M-1 adduct	hydroxycinnamic acids	0.795001	-0.861236	0.187256	0.0547464	0.0408575	7.25684e+06	4.01687e+06	3.26389e+06	3.45371e+06	965704	2.52336e+06	1.18881e+06	2.64084e+06	4.86039e+06	621599	1.80496e+06	2.71083e+06	1.50556e+06	2.70435e+06	2.21273e+06	964445	635763	548614	5.31025e+06	4.50477e+06	2.74485e+06	4.44812e+06	3.53539e+06	5.14682e+06	7.86384e+06	1.05088e+07	1.05633e+07	7.1847e+06	8.14497e+06	6.65795e+06	690236	1.8504e+06	3.68977e+06	1.9713e+06	1.06809e+06	2.66787e+06
708.775	15.0571	Caffeoyl quinic acid, 2M-1 adduct	hydroxycinnamic acids	0.73906	-0.660693	0.32045	-0.00267728	0.129139	1.09284e+06	2.01305e+06	554705	892080	466856	737463	1.03427e+06	784512	768368	239836	218172	577365	387116	310556	284113	173141	179273	55776.5	775704	497719	339409	1.94427e+06	684419	463030	1.81525e+06	1.31115e+06	1.79892e+06	1.54664e+06	1.53386e+06	1.21172e+06	971565	1.01926e+06	182360	677172	957248	663563
706.784	15.0754	Caffeoyl quinic acid, 2M-1 adduct	hydroxycinnamic acids	0.580204	-0.833262	0.347971	0.0944348	0.111007	1.69637e+07	1.52153e+07	1.40473e+07	1.3664e+07	9.73785e+06	1.07134e+07	7.771e+06	9.51665e+06	9.63048e+06	3.41022e+06	8.38795e+06	9.21498e+06	6.43557e+06	7.15289e+06	6.02103e+06	3.12939e+06	1.74502e+06	1.36788e+06	1.38519e+07	1.69293e+07	1.1901e+07	1.4511e+07	1.72115e+07	1.39113e+07	2.51233e+07	3.33164e+07	2.5718e+07	2.02433e+07	1.91948e+07	2.14465e+07	4.63889e+06	7.91057e+06	7.62118e+06	1.49821e+07	1.59093e+07	1.46981e+07
324.849	13.3653	Catechin	procyanidins and flavan-3-ols	-0.0732725	0.262894	-0.776457	0.229069	0.159019	866185	669043	1.07904e+06	389825	754507	766409	619167	815513	396219	322165	282476	429285	2.32817e+06	4.57367e+06	3.73144e+06	4.09672e+06	4.00986e+06	5.47554e+06	1.35105e+06	2.65042e+06	301511	545119	449432	541568	655948	319152	784401	654913	453668	540100	264116	600908	154319	453946	625559	522106
288.815	12.9063	Catechin	procyanidins and flavan-3-ols	-0.0984395	0.249536	-0.751541	0.202925	0.178652	1.91854e+06	1.11424e+06	1.75392e+06	950478	1.63754e+06	1.00242e+06	491387	883376	2.45707e+06	309711	637245	748403	1.22183e+07	6.00997e+06	7.66582e+06	5.11513e+06	4.07522e+06	6.13689e+06	671999	1.88628e+06	986159	4.36166e+06	1.38613e+06	1.63921e+06	832909	1.02122e+06	872688	2.26247e+06	1.53809e+06	1.61031e+06	2.01302e+06	4.37033e+06	3.20574e+06	1.15851e+06	1.83229e+06	740014
450.795	13.1455	Catechin hexose	procyanidins and flavan-3-ols	-0.128962	-0.0159037	0.483227	0.134316	-0.323319	1.1027e+07	2.46025e+07	3.59571e+07	3.32222e+07	2.63041e+07	3.32677e+07	2.73688e+07	3.86743e+07	3.17424e+07	2.40997e+07	3.96216e+07	4.54998e+07	7.64237e+06	1.59987e+07	9.6678e+06	1.28904e+07	1.92263e+07	8.65482e+06	4.57675e+07	4.55874e+07	4.36979e+07	1.36939e+07	7.44573e+07	6.68069e+07	4.72583e+07	1.49539e+07	2.17066e+07	2.80694e+07	2.95537e+07	2.11267e+07	3.56042e+07	3.56833e+07	2.50693e+07	4.33271e+07	6.50362e+07	5.76146e+07
451.788	13.1288	Catechin hexose, isotope	procyanidins and flavan-3-ols	0.386622	-0.0529075	0.25837	-0.411084	-0.403947	2.38304e+06	1.25259e+06	1.08621e+06	1.34303e+06	4.19578e+06	3.45228e+06	5.27902e+06	2.69019e+06	4.14459e+06	4.55675e+06	3.08332e+06	7.02726e+06	1.81052e+06	1.94615e+06	1.89655e+06	2.00497e+06	1.77142e+06	2.31174e+06	4.6518e+06	3.10425e+06	4.91476e+06	2.65239e+06	2.97609e+06	1.89898e+06	1.01081e+06	2.92231e+06	3.00628e+06	3.13687e+06	5.96698e+06	4.26844e+06	3.92814e+06	3.10398e+06	2.94279e+06	4.35145e+06	2.64437e+06	4.00892e+06
452.764	13.0993	Catechin hexose, isotope	procyanidins and flavan-3-ols	-0.0121862	-0.429909	0.201289	0.19862	-0.240615	629981	2.16138e+06	1.10686e+06	3.44386e+06	825521	510653	883431	2.1921e+06	2.30813e+06	964864	892847	1.73622e+06	1.3275e+06	1.08698e+06	1.02845e+06	609357	974118	703843	1.25851e+06	1.06677e+06	1.78386e+06	2.43465e+06	2.26295e+06	4.53657e+06	2.16008e+06	3.23717e+06	1.79669e+06	3.52979e+06	1.82214e+06	1.49151e+06	1.18689e+06	540258	1.32627e+06	2.69734e+06	2.55955e+06	2.88983e+06
582.846	19.7351	Catechin/epicatechin derivative	procyanidins and flavan-3-ols	0.552732	-0.0807753	-0.48946	-0.250207	-0.383542	1.40173e+06	606525	875144	2.33803e+06	2.54503e+06	1.28358e+06	7.54877e+06	6.56988e+06	7.09967e+06	4.12e+06	3.59217e+06	4.51978e+06	3.54116e+06	5.68447e+06	2.99208e+06	5.81331e+06	6.04423e+06	6.17762e+06	4.56183e+06	3.71926e+06	3.81306e+06	3.56617e+06	4.76659e+06	3.81887e+06	4.50495e+06	2.47584e+06	5.10838e+06	4.77639e+06	3.31986e+06	5.14832e+06	3.66625e+06	4.41794e+06	3.64675e+06	2.07742e+06	990769	2.1678e+06
244.802	19.663	Catechin/epicatechin derivative	procyanidins and flavan-3-ols	0.190414	-0.621674	0.101279	0.217201	-0.525638	4.53852e+06	3.70616e+06	3.88284e+06	3.36148e+06	2.62344e+06	2.28758e+06	6.46113e+06	7.894e+06	8.55031e+06	4.09685e+06	3.96966e+06	4.56383e+06	3.47954e+06	2.50493e+06	3.70505e+06	903128	1.34077e+06	1.14224e+06	5.95669e+06	5.71639e+06	6.50522e+06	1.06347e+07	1.03715e+07	1.04617e+07	6.07407e+06	6.16985e+06	5.39491e+06	1.07391e+07	9.34346e+06	8.135e+06	808772	825346	1.42393e+06	2.0443e+06	1.53577e+06	1.75442e+06
560.813	16.3767	Catechin/epicatechin derivative	procyanidins and flavan-3-ols	0.5733	-0.452369	-0.457484	-0.0412257	0.110535	483722	465431	684424	649309	608153	319712	712525	1.04664e+06	767178	1.19422e+06	952072	791498	858629	1.11489e+06	1.94783e+06	1.02016e+06	1.44704e+06	1.82098e+06	1.43578e+06	742057	496107	827159	2.03037e+06	611586	1.97535e+06	2.13122e+06	943577	2.17963e+06	823891	1.88786e+06	1.36212e+06	942693	1.12201e+06	1.13907e+06	897876	543880
446.854	14.2728	Cyanidin 3-O-glucoside	anthocyanins	0.310378	-0.41024	0.312111	0.219643	0.202239	2.60718e+06	3.18568e+06	271885	449698	1.58593e+06	1.33723e+06	0	0	135631	129029	220121	131871	200503	248546	627620	154669	75362.6	216152	2.49331e+06	2.02966e+06	2.92251e+06	2.86679e+06	2.98716e+06	1.22752e+06	3.08733e+06	2.10738e+06	1.82275e+06	981468	3.77437e+06	3.89718e+06	4.4503e+06	4.21849e+06	2.94753e+06	399720	858077	532039
324.822	15.5234	Epicatechin	procyanidins and flavan-3-ols	0.669407	0.128492	-0.373792	0.435353	0.280263	6.09917e+06	4.24225e+06	5.2489e+06	4.38981e+06	2.26171e+06	4.0696e+06	1.5996e+06	3.40058e+06	4.22535e+06	1.1695e+06	2.19898e+06	1.96569e+06	5.60478e+06	5.22203e+06	6.74347e+06	3.47123e+06	5.47913e+06	5.41821e+06	5.3064e+06	3.68853e+06	4.04925e+06	2.4008e+06	3.6898e+06	4.46129e+06	2.90428e+06	1.90073e+06	4.59131e+06	2.68168e+06	3.47658e+06	3.56582e+06	3.22676e+06	1.11681e+06	3.25524e+06	3.32829e+06	2.30533e+06	3.57879e+06
326.816	15.5175	Epicatechin	procyanidins and flavan-3-ols	0.158704	-0.0565909	-0.574156	0.16824	0.144311	551405	1.66612e+06	777243	344196	738457	1.44194e+06	875471	989893	1.1503e+06	550359	300729	605276	2.92183e+06	1.484e+06	1.53781e+06	828177	2.2813e+06	1.49987e+06	638569	1.13781e+06	517867	343855	1.95971e+06	1.10386e+06	1.17212e+06	445611	1.22192e+06	1.79284e+06	1.0266e+06	1.02264e+06	390371	572487	956836	687351	487542	1.1684e+06
288.827	15.5401	Epicatechin	procyanidins and flavan-3-ols	-0.0720156	-0.520895	-0.688743	0.199833	0.265901	4.7934e+07	4.64531e+07	4.32271e+07	4.58774e+07	3.94598e+07	3.98238e+07	4.32798e+07	4.89712e+07	4.47299e+07	3.56974e+07	3.80501e+07	3.98202e+07	6.03005e+07	5.97797e+07	5.86999e+07	5.50613e+07	6.09313e+07	5.78955e+07	4.63385e+07	4.31261e+07	4.73553e+07	5.50773e+07	5.16159e+07	4.95534e+07	6.2316e+07	5.71299e+07	5.81777e+07	6.06794e+07	4.9841e+07	6.51541e+07	4.23521e+07	5.2374e+07	4.72731e+07	4.70586e+07	4.46489e+07	4.38854e+07
450.795	15.0008	Epicatechin hexose	procyanidins and flavan-3-ols	-0.140463	0.0528142	0.36572	0.279897	-0.390159	2.35925e+06	2.7181e+06	2.03117e+06	2.35931e+06	476151	3.17109e+06	1.61193e+06	2.67791e+06	3.596e+06	2.94157e+06	2.92049e+06	2.98873e+06	1.54347e+06	828073	796687	1.45497e+06	666349	1.21629e+06	2.15356e+06	3.72924e+06	1.92588e+06	3.65486e+06	2.88259e+06	7.48466e+06	2.53143e+06	1.77032e+06	904047	2.65686e+06	1.03942e+06	1.03562e+06	2.68468e+06	1.3167e+06	903957	4.03742e+06	2.8449e+06	3.98614e+06
272.817	23.0928	Phloretin	chalcones	0.348236	-0.299519	0.0138113	-0.431819	-0.0784171	2.47487e+06	1.46856e+06	3.64072e+06	667078	1.90583e+06	2.82774e+06	1.27339e+06	6.04071e+06	5.76237e+06	2.03892e+06	2.6614e+06	2.54395e+06	1.05362e+06	3.03807e+06	1.60927e+06	1.31321e+06	1.09128e+06	539134	511775	619583	2.55068e+06	2.1104e+06	838842	1.2711e+06	3.46277e+06	3.62411e+06	3.78162e+06	1.92573e+06	2.54994e+06	3.88069e+06	1.20319e+06	474557	1.60141e+06	792667	4.33733e+06	961513
566.907	21.7103	Phloretin 2'-O-xyloglucoside	chalcones	0.926108	-0.907536	-0.246207	-0.182333	-0.153425	3.90593e+07	3.51414e+07	4.02156e+07	4.45278e+07	4.26181e+07	4.9544e+07	7.13179e+07	6.97589e+07	6.41782e+07	6.30349e+07	7.21468e+07	7.65686e+07	7.15653e+07	7.8698e+07	5.53098e+07	7.17944e+07	7.35585e+07	7.02447e+07	6.4764e+07	6.74195e+07	7.14274e+07	8.39695e+07	9.28431e+07	8.19299e+07	1.28226e+08	1.29849e+08	1.3581e+08	1.36594e+08	1.47599e+08	1.33414e+08	5.78242e+07	6.27932e+07	6.31203e+07	6.72774e+07	6.91371e+07	6.69432e+07
602.849	21.7776	Phloretin 2'-O-xyloglucoside, adduct	chalcones	0.667367	-0.680688	-0.0986899	-0.0114173	0.10511	2.32945e+06	3.2692e+06	2.86701e+06	1.50528e+06	2.5883e+06	2.61402e+06	1.89284e+06	2.67288e+06	2.57252e+06	1.00589e+06	2.70303e+06	2.98468e+06	2.49967e+06	3.23468e+06	4.81853e+06	3.74268e+06	4.18271e+06	2.00816e+06	6.51105e+06	5.21353e+06	4.2188e+06	2.1889e+06	2.34946e+06	2.95015e+06	5.6103e+06	5.49981e+06	8.70003e+06	3.97423e+06	6.62414e+06	6.39153e+06	1.35113e+06	1.79262e+06	2.38664e+06	4.53128e+06	4.22335e+06	4.60603e+06
596.879	20.8021	Phloretin O-dihexoside	chalcones	0.853826	-0.870475	-0.0694165	-0.216053	-0.0493695	702548	229430	370277	1.14343e+06	957955	845749	947827	1.40356e+06	1.03906e+06	1.31352e+06	942520	1.05698e+06	865022	1.53996e+06	463736	1.14975e+06	814177	901926	835555	1.28525e+06	883006	1.27863e+06	1.33217e+06	1.45604e+06	2.84783e+06	2.17418e+06	2.9317e+06	2.96677e+06	2.52501e+06	2.13623e+06	877873	853832	1.27214e+06	495995	1.51201e+06	1.19396e+06
434.882	23.1319	Phloridzin (phloretin-2'-O-glucoside)	chalcones	0.358007	-0.321107	0.120001	-0.641816	-0.254462	4.50305e+07	4.66169e+07	6.66183e+07	4.1502e+07	4.76093e+07	5.4008e+07	8.17633e+07	1.20367e+08	9.66966e+07	5.60057e+07	8.17228e+07	8.52345e+07	3.17726e+07	4.93867e+07	2.82853e+07	3.29091e+07	3.5147e+07	2.28083e+07	3.35995e+07	3.36537e+07	3.27796e+07	3.74006e+07	2.92162e+07	3.98772e+07	7.11272e+07	7.30089e+07	6.92194e+07	6.47177e+07	7.05121e+07	8.45593e+07	2.74308e+07	2.95776e+07	3.51671e+07	3.22205e+07	6.73763e+07	3.07575e+07
470.854	23.1266	Phloridzin (phloretin-2'-O-glucoside)	chalcones	0.347792	-0.358606	0.157008	-0.308698	-0.14716	1.3117e+07	9.90919e+06	1.28422e+07	1.09929e+07	1.19715e+07	1.50256e+07	1.20073e+07	2.30322e+07	1.96862e+07	8.85156e+06	9.49457e+06	1.20334e+07	7.76354e+06	1.23816e+07	8.12286e+06	5.69402e+06	7.1677e+06	2.26918e+06	8.80532e+06	8.45528e+06	1.03655e+07	9.46798e+06	6.76544e+06	9.0676e+06	1.13322e+07	1.37298e+07	1.33905e+07	1.47704e+07	1.38746e+07	1.42493e+07	3.1871e+06	4.69897e+06	5.93538e+06	6.68923e+06	1.17162e+07	4.31612e+06
485.11	31.6734	Lipid	lipids	0.636795	-0.724495	0.235698	-0.128636	0.3502	2.52801e+07	2.18578e+07	1.63344e+07	2.50967e+07	2.64284e+07	2.68978e+07	1.07405e+07	1.18398e+07	9.94073e+06	5.50099e+06	5.40941e+06	1.79165e+06	5.86489e+06	7.30648e+06	6.12075e+06	1.1833e+06	970446	790521	1.59153e+07	1.72533e+07	1.43284e+07	9.84755e+06	8.76581e+06	7.49505e+06	5.13803e+07	1.59931e+06	4.93351e+07	6.17057e+07	4.75877e+07	5.5998e+07	1.27773e+07	9.67953e+06	1.21492e+07	1.06377e+07	1.2847e+07	9.14654e+06
487.131	29.7552	Lipid	lipids	0.335763	-0.388861	0.370777	-0.254185	0.355008	2.05312e+07	1.89973e+07	1.94421e+07	1.83987e+07	2.18449e+07	2.25036e+07	1.90487e+07	1.46662e+07	1.21156e+07	5.43099e+06	5.80125e+06	6.55364e+06	2.86238e+06	3.29771e+06	2.71474e+06	1.41331e+06	1.24601e+06	690571	2.19944e+06	3.67e+06	2.71504e+06	1.54466e+06	1.67254e+06	1.15299e+06	1.09368e+07	2.4914e+07	1.72237e+07	4.15786e+07	8.85417e+06	1.49757e+07	1.10121e+07	6.19841e+06	8.20168e+06	4.19149e+06	3.31256e+06	3.63622e+06
492.861	19.5328	Pentahydroxy monomethoxy flavone-O-hexoside	flavonoids	-0.21109	0.383209	-0.63437	-0.199866	-0.288264	307566	328110	112760	296002	260333	242424	1.13916e+06	936755	844060	1.54843e+06	1.56573e+06	1.53997e+06	1.3752e+06	1.27788e+06	2.3512e+06	1.28415e+06	1.11408e+06	1.51068e+06	324279	272050	363543	968727	668751	730885	550645	329388	136812	495766	353809	423835	254323	205132	544095	661814	423832	1.49181e+06
406.946	17.673	Procyanidin, fragment	procyanidins and flavan-3-ols	0.745127	-0.633058	-0.617382	-0.024065	0.185791	229794	199374	175267	156374	148452	364444	51639.2	101660	131963	89554.9	125301	77857.1	1.17807e+06	2.02257e+06	2.21772e+06	1.31386e+06	1.94152e+06	2.23652e+06	577271	929589	631397	207030	383885	465508	1.77056e+06	1.6014e+06	1.84179e+06	2.83977e+06	3.12938e+06	3.11548e+06	84254.3	66875.4	61666.7	61644.3	209680	195117
576.855	14.4531	Procyanidin P2	procyanidins and flavan-3-ols	0.877251	-0.778253	-0.579847	0.0134011	0.00786537	1.73013e+08	1.80118e+08	1.77342e+08	1.88453e+08	1.62043e+08	1.94978e+08	1.8696e+08	2.28548e+08	2.13622e+08	1.76946e+08	1.96105e+08	1.84236e+08	2.7885e+08	2.77245e+08	2.7519e+08	2.48291e+08	2.46904e+08	2.50146e+08	1.84365e+08	2.08914e+08	2.16087e+08	2.39137e+08	2.72807e+08	2.14293e+08	3.43046e+08	3.0044e+08	2.97789e+08	3.24189e+08	3.18696e+08	3.44609e+08	1.83446e+08	1.46509e+08	1.47874e+08	1.77955e+08	1.80249e+08	1.56417e+08
576.852	11.6118	Procyanidin P2	procyanidins and flavan-3-ols	0.87436	-0.554592	-0.580953	0.531498	0.129947	4.09857e+07	4.2986e+07	4.23941e+07	3.66515e+07	3.31293e+07	4.49311e+07	2.59869e+07	3.24001e+07	3.12885e+07	1.7883e+07	1.97742e+07	2.17012e+07	7.52933e+07	9.17409e+07	7.93778e+07	8.52033e+07	8.13035e+07	8.28381e+07	6.71891e+07	6.11913e+07	6.11315e+07	9.73757e+07	8.62858e+07	8.30535e+07	8.59627e+07	9.63801e+07	7.85974e+07	7.92675e+07	6.60268e+07	9.24277e+07	4.74178e+07	4.94594e+07	4.80257e+07	4.79942e+07	4.67582e+07	4.85987e+07
576.838	19.6501	Procyanidin P2	procyanidins and flavan-3-ols	0.804827	-0.758	-0.552365	-0.164922	0.124607	1.05071e+07	1.05697e+07	1.20239e+07	1.1462e+07	1.16431e+07	1.15516e+07	1.24535e+07	1.46166e+07	1.48307e+07	1.30993e+07	1.29039e+07	1.31659e+07	1.81984e+07	2.05137e+07	2.11948e+07	2.06049e+07	1.60459e+07	1.83624e+07	1.23501e+07	1.41248e+07	1.46245e+07	1.48544e+07	1.49639e+07	1.08847e+07	2.61118e+07	2.72369e+07	2.503e+07	2.33783e+07	2.26646e+07	2.44103e+07	1.09305e+07	1.31933e+07	1.1218e+07	1.50499e+07	1.35804e+07	1.33131e+07
575.992	16.9392	Procyanidin P2	procyanidins and flavan-3-ols	0.638557	-0.796769	-0.0648715	-0.326955	0.0134577	2.83471e+06	6.08227e+06	5.32664e+06	4.91416e+06	4.8902e+06	7.40699e+06	6.56528e+06	5.30011e+06	8.30254e+06	6.76685e+06	7.51452e+06	7.29193e+06	1.58404e+06	9.37767e+06	3.36272e+06	2.04653e+06	9.00334e+06	5.32697e+06	6.76183e+06	3.39635e+06	5.54353e+06	7.76875e+06	2.56814e+06	5.89168e+06	1.32875e+07	1.35896e+07	1.55599e+07	1.52685e+07	1.70823e+07	1.61555e+07	1.07624e+07	2.84484e+06	4.79125e+06	2.94926e+06	7.83981e+06	1.99216e+06
577.78	14.4259	Procyanidin P2, isotope	procyanidins and flavan-3-ols	0.754704	-0.519099	-0.618225	-0.0325247	-0.126143	2.86542e+07	5.35441e+07	4.34393e+07	1.86034e+07	4.83383e+07	3.7435e+07	5.2191e+07	4.97664e+07	5.46743e+07	3.60958e+07	4.93633e+07	4.94814e+07	7.85951e+07	8.05724e+07	7.05316e+07	4.92211e+07	7.25417e+07	6.60997e+07	3.5947e+07	3.20401e+07	5.76377e+07	6.98048e+07	4.08093e+07	6.72424e+07	4.75839e+07	8.51861e+07	8.66068e+07	7.36224e+07	8.59269e+07	6.8835e+07	2.22556e+07	4.26832e+07	4.29143e+07	5.51532e+07	4.09487e+07	4.49489e+07
578.817	14.3728	Procyanidin P2, isotope	procyanidins and flavan-3-ols	0.635804	-0.702131	-0.331499	0.219115	-0.12845	4.00731e+06	1.38076e+07	8.3622e+06	7.13382e+06	2.93853e+06	8.3224e+06	4.31227e+06	8.47365e+06	1.39509e+07	5.82427e+06	9.41015e+06	4.46778e+06	9.08166e+06	2.04322e+07	8.87245e+06	7.37935e+06	1.66655e+07	1.18164e+07	1.244e+07	1.5775e+07	1.46445e+07	1.97411e+07	6.40728e+06	1.57377e+07	2.11082e+07	1.768e+07	1.39514e+07	2.02274e+07	2.22783e+07	1.85853e+07	5.53776e+06	9.26082e+06	3.70868e+06	5.25581e+06	6.97271e+06	8.05393e+06
577.836	19.6147	Procyanidin P2, isotope	procyanidins and flavan-3-ols	0.573146	-0.525576	-0.14818	-0.2578	0.0637268	3.90847e+06	4.15404e+06	3.89916e+06	3.89243e+06	3.57319e+06	3.97101e+06	2.67177e+06	6.59147e+06	5.04648e+06	5.24853e+06	3.83004e+06	4.6282e+06	2.13615e+06	7.23401e+06	5.50298e+06	4.78659e+06	5.33003e+06	4.88699e+06	7.35607e+06	6.30163e+06	6.73488e+06	635240	1.65042e+06	3.52727e+06	1.03577e+07	1.07959e+07	7.88286e+06	1.45087e+06	9.1169e+06	8.74362e+06	3.96779e+06	3.57277e+06	3.72412e+06	1.82399e+06	5.18238e+06	4.34258e+06
578.806	19.6352	Procyanidin P2, isotope	procyanidins and flavan-3-ols	0.521145	-0.594271	0.0547752	0.396579	-0.485309	3.35193e+06	4.22919e+06	3.13238e+06	2.96403e+06	1.8961e+06	2.49364e+06	7.34888e+06	1.4937e+07	1.27312e+07	3.00932e+06	4.22308e+06	5.44244e+06	1.99028e+06	3.35157e+06	1.49415e+06	750266	1.43295e+06	1.38654e+06	1.46894e+07	1.46307e+07	1.04942e+07	4.17143e+07	2.82575e+07	3.93784e+07	1.08857e+07	9.60316e+06	9.14758e+06	2.90729e+07	3.11606e+07	2.25505e+07	534812	1.47612e+06	644032	1.89213e+06	1.79391e+06	1.00258e+06
578.744	15.5439	Procyanidin P2, isotope	procyanidins and flavan-3-ols	0.519277	-0.362944	-0.323041	0.0111744	0.0146922	2.70514e+06	897258	1.10922e+06	1.22416e+06	2.21645e+06	1.85149e+06	1.473e+06	773085	2.63899e+06	877091	1.98404e+06	694915	3.91536e+06	1.97957e+06	1.85387e+06	2.47051e+06	3.40522e+06	1.41011e+06	2.10463e+06	969129	1.24833e+06	1.24508e+06	2.10723e+06	2.00813e+06	2.0739e+06	4.49046e+06	1.84804e+06	3.04154e+06	4.12565e+06	1.0174e+06	2.24059e+06	963381	1.36771e+06	1.44195e+06	1.90616e+06	2.20478e+06
579.791	19.725	Procyanidin P2, isotope	procyanidins and flavan-3-ols	0.511701	-0.517447	0.0280553	0.411339	-0.472299	897404	1.51571e+06	1.5266e+06	848841	276260	348222	3.54882e+06	4.56785e+06	4.21907e+06	700243	1.24418e+06	962548	875514	778913	1.03577e+06	175611	521260	236185	3.15361e+06	3.00978e+06	3.61087e+06	1.27749e+07	8.86921e+06	1.11535e+07	3.03376e+06	1.78908e+06	1.51545e+06	9.15988e+06	6.65367e+06	6.53881e+06	129815	82722	122717	215282	630916	256150
579.835	14.4508	Procyanidin P2, isotope	procyanidins and flavan-3-ols	0.455424	-0.402666	-0.452479	0.160598	0.106157	662318	1.34776e+06	1.22866e+06	674226	1.43237e+06	875546	597407	958899	519915	731792	1.46886e+06	724100	2.30228e+06	2.11772e+06	3.02024e+06	561751	1.70965e+06	2.24844e+06	915880	1.54736e+06	1.08703e+06	1.22821e+06	2.77309e+06	1.24317e+06	699640	4.86429e+06	1.33937e+06	1.85072e+06	1.3684e+06	2.95756e+06	409890	1.71203e+06	990269	1.03504e+06	544810	336113
580.838	14.3624	Procyanidin P2, isotope	procyanidins and flavan-3-ols	0.429911	-0.472399	-0.0736615	-0.0731143	0.0529437	389231	345217	136734	782074	131931	205392	173147	476190	701344	571559	389095	171225	282530	289167	297922	279549	373618	817210	227352	603437	496684	300793	573213	460519	1.30712e+06	815112	272102	714046	500563	670721	679652	294097	295304	106840	409703	526472
864.849	19.9138	Procyanidin P3	procyanidins and flavan-3-ols	0.814755	-0.708745	-0.345215	-0.232569	0.223792	612470	779230	354551	857846	737500	526547	630051	1.32564e+06	1.2549e+06	1.44828e+06	1.35208e+06	671431	2.18399e+06	2.66127e+06	958821	771163	1.83174e+06	1.89041e+06	722638	1.33715e+06	459574	677233	1.85241e+06	308325	3.81945e+06	4.75077e+06	3.40575e+06	2.37226e+06	2.07841e+06	5.01006e+06	334578	1.12206e+06	960524	2.8607e+06	805145	1.39615e+06
866.919	19.7267	Procyanidin P3, isotope	procyanidins and flavan-3-ols	0.686054	-0.715225	-0.0732054	0.201226	-0.198452	227877	1.03395e+06	623739	1.04432e+06	548327	256992	1.33568e+06	1.20831e+06	914413	342596	315252	874134	561798	759805	478233	392119	708598	899608	1.20645e+06	506367	1.89745e+06	2.66394e+06	1.5167e+06	2.71932e+06	3.11663e+06	865378	915883	2.77793e+06	2.32027e+06	3.36445e+06	134140	124166	399917	571938	199545	145432
1153.04	16.9283	Procyanidin P4	procyanidins and flavan-3-ols	0.955714	-0.872597	-0.319286	-0.137358	0.181193	6.16666e+06	7.9541e+06	6.8693e+06	1.03462e+07	8.13895e+06	1.05151e+07	1.05684e+07	1.10183e+07	1.06641e+07	7.53046e+06	1.04927e+07	8.05533e+06	1.23421e+07	1.51325e+07	1.55597e+07	1.22456e+07	1.24294e+07	1.18186e+07	1.06233e+07	8.97947e+06	1.09187e+07	1.40633e+07	1.22877e+07	9.81623e+06	2.59119e+07	3.07792e+07	2.15643e+07	2.78836e+07	1.92044e+07	2.99006e+07	1.14552e+07	8.47052e+06	8.66609e+06	1.04333e+07	9.991e+06	1.26051e+07
1153.03	14.8417	Procyanidin P4	procyanidins and flavan-3-ols	0.679576	-0.617769	-0.34783	-0.011332	-0.0819735	1.92752e+06	7.41102e+06	5.11873e+06	6.7666e+06	4.46634e+06	4.40434e+06	2.67576e+06	1.07802e+07	7.93108e+06	7.16671e+06	8.22106e+06	4.35581e+06	3.02125e+06	1.29646e+07	7.61536e+06	1.1722e+07	5.17046e+06	1.02422e+07	8.52466e+06	8.42342e+06	3.89561e+06	7.65719e+06	7.31067e+06	9.22203e+06	9.52445e+06	6.97524e+06	1.23065e+07	1.72802e+07	1.34625e+07	1.6218e+07	4.7356e+06	3.53765e+06	1.35693e+06	4.72534e+06	1.91682e+06	6.43936e+06
1152.97	21.4782	Procyanidin P4	procyanidins and flavan-3-ols	0.621735	-0.586005	-0.0829242	-0.0536833	0.0572835	289358	205736	149250	205612	140273	372925	397238	176985	243508	163357	306788	499017	282707	394723	342636	466023	185054	111118	309166	1.01839e+06	136799	316647	215489	426111	387119	703745	188805	1.65233e+06	707881	1.43473e+06	288630	344874	183282	161600	387351	307857
576.791	16.9768	Procyanidin P4, m/2-1	procyanidins and flavan-3-ols	0.629684	-0.57315	-0.379017	0.379013	0.0790135	6.07476e+06	5.37239e+06	6.53608e+06	4.97187e+06	5.86607e+06	7.65885e+06	6.30282e+06	6.96763e+06	6.02013e+06	4.25858e+06	6.1072e+06	4.10504e+06	1.29043e+07	9.49288e+06	1.05687e+07	9.78837e+06	8.34299e+06	7.59519e+06	9.35896e+06	7.90269e+06	8.26795e+06	1.36692e+07	1.19786e+07	1.18933e+07	1.54373e+07	1.40238e+07	9.59864e+06	1.09356e+07	8.71374e+06	1.08942e+07	8.18934e+06	7.6964e+06	7.38721e+06	1.27675e+07	8.39562e+06	8.53728e+06
577.81	16.9473	Procyanidin P4, isotope	procyanidins and flavan-3-ols	0.414826	-0.34646	-0.354155	0.402113	0.0145565	609602	840363	2.07486e+06	1.62451e+06	305000	1.08392e+06	549082	1.32462e+06	1.08954e+06	708539	711016	1.10638e+06	4.15432e+06	2.03207e+06	2.30112e+06	2.17355e+06	1.31859e+06	2.16513e+06	2.49696e+06	2.88184e+06	1.36651e+06	3.74034e+06	1.96469e+06	1.71208e+06	2.90979e+06	2.79566e+06	1.02544e+06	3.90158e+06	1.86187e+06	1.6619e+06	1.4324e+06	1.55335e+06	1.46467e+06	2.58475e+06	1.92085e+06	2.16213e+06
1154.03	16.9555	Procyanidin P4, isotope	procyanidins and flavan-3-ols	0.883162	-0.658359	-0.290499	-0.151445	0.18279	3.06079e+06	4.35398e+06	4.39222e+06	5.43721e+06	3.03625e+06	6.85045e+06	4.39753e+06	2.77957e+06	7.13697e+06	6.44572e+06	5.70959e+06	4.48663e+06	7.58958e+06	9.82794e+06	4.36794e+06	6.13212e+06	5.72987e+06	7.60529e+06	5.0578e+06	6.68426e+06	3.90156e+06	5.43351e+06	7.71739e+06	6.44134e+06	1.36249e+07	5.72938e+06	1.29603e+07	6.22352e+06	1.22349e+07	1.69166e+07	5.40873e+06	4.52081e+06	6.3439e+06	6.18694e+06	7.13828e+06	5.43074e+06
1155.03	14.5236	Procyanidin P4, isotope	procyanidins and flavan-3-ols	0.693132	-0.333519	-0.320189	0.192648	-0.314217	2.89448e+06	2.45017e+06	875407	3.72278e+06	1.17785e+06	1.30483e+06	2.07333e+06	979414	7.09897e+06	3.23747e+06	3.15893e+06	2.69682e+06	2.93846e+06	6.0991e+06	4.38123e+06	3.54759e+06	8.97531e+06	2.81031e+06	4.24549e+06	5.39339e+06	4.54754e+06	5.67077e+06	3.15952e+06	6.98577e+06	1.06978e+07	3.10241e+06	1.96884e+06	2.46178e+06	9.10797e+06	2.56323e+06	1.41628e+06	752066	1.00443e+06	3.4557e+06	3.70153e+06	1.428e+06
1156.02	14.3986	Procyanidin P4, isotope	procyanidins and flavan-3-ols	0.651765	-0.475618	-0.351622	0.167407	0.125969	1.84251e+06	1.35607e+06	1.16678e+06	938612	799744	1.44028e+06	2.97229e+06	1.06242e+06	1.0691e+06	288277	619008	968171	748919	2.78295e+06	2.19815e+06	965832	4.62494e+06	1.32273e+06	1.73527e+06	1.31115e+06	845289	3.80308e+06	1.42085e+06	2.45385e+06	3.38802e+06	3.54202e+06	1.3319e+06	1.42593e+06	1.67292e+06	6.09229e+06	268859	554235	668586	1.12049e+06	1.50296e+06	1.16933e+06
1154.03	14.8093	Procyanidin P4, isotope	procyanidins and flavan-3-ols	0.651263	-0.547317	-0.272673	-0.109358	0.2376	1.52672e+06	2.7827e+06	3.64317e+06	2.008e+06	1.86162e+06	1.78125e+06	1.55124e+06	2.62525e+06	2.70483e+06	886897	2.07257e+06	2.82905e+06	1.41165e+06	3.37549e+06	9.37822e+06	864159	4.40177e+06	1.50755e+06	2.95119e+06	2.2957e+06	2.1847e+06	1.55598e+06	2.2283e+06	2.57461e+06	3.78269e+06	1.01982e+07	5.23841e+06	4.50549e+06	4.06202e+06	9.62193e+06	1.29838e+06	5.49739e+06	1.00803e+06	2.55507e+06	2.05859e+06	2.60419e+06
1155.04	16.9548	Procyanidin P4, isotope	procyanidins and flavan-3-ols	0.571343	-0.804739	-0.320642	-0.199817	0.122018	1.44526e+06	1.73315e+06	844530	1.32091e+06	1.36639e+06	1.83497e+06	2.29594e+06	1.85508e+06	1.34215e+06	1.25715e+06	2.15105e+06	2.13024e+06	2.03647e+06	3.17866e+06	3.32312e+06	2.82802e+06	2.72462e+06	2.2316e+06	1.14136e+06	1.52759e+06	1.55387e+06	2.55108e+06	2.39243e+06	1.39626e+06	6.10581e+06	8.43184e+06	4.45083e+06	4.2033e+06	4.98916e+06	4.8289e+06	1.18725e+06	1.80968e+06	2.43452e+06	2.27016e+06	2.27452e+06	1.56716e+06
1154.01	13.3761	Procyanidin P4, isotope	procyanidins and flavan-3-ols	0.555009	-0.513641	-0.302247	0.0758872	0.0327943	573716	809754	498413	330828	416797	1.15531e+06	853622	159857	1.25724e+06	1.11021e+06	1.10852e+06	394433	2.02285e+06	2.4052e+06	1.35296e+06	567124	682834	1.04485e+06	1.80761e+06	1.13995e+06	2.24352e+06	1.45934e+06	1.12481e+06	632173	1.04929e+06	1.85713e+06	2.62067e+06	2.48391e+06	1.3833e+06	1.72591e+06	1.27553e+06	810238	1.14918e+06	1.35489e+06	944261	935359
1157.01	14.4415	Procyanidin P4, isotope	procyanidins and flavan-3-ols	0.548888	-0.439483	-0.329671	0.167289	-0.00153904	199522	330736	193170	632858	744555	438782	197389	1.58321e+06	1.31945e+06	325669	642642	72077.7	878029	936581	1.6474e+06	324083	712921	982522	656893	1.00059e+06	398413	1.33099e+06	834139	2.4836e+06	1.51123e+06	1.77075e+06	716929	1.01919e+06	369004	2.37843e+06	950535	800415	394536	324450	473205	368643
1156.05	16.9928	Procyanidin P4, isotope	procyanidins and flavan-3-ols	0.365694	-0.597095	-0.303948	-0.128782	0.275439	189212	345282	361716	276764	374299	960966	344275	623639	307477	414448	365306	319053	1.19683e+06	882878	819806	200792	453659	453017	307166	457630	535933	420807	400571	505018	889127	812940	1.97296e+06	1.43131e+06	335113	1.33165e+06	623998	128533	259768	166562	657018	402458
1441.05	15.1975	Procyanidin P5	procyanidins and flavan-3-ols	0.739159	-0.688186	-0.210069	0.101638	0.00106629	420546	598265	266340	526272	457722	306433	301664	125888	632956	459708	365338	824327	1.17596e+06	787855	621532	532345	1.0043e+06	450902	1.09163e+06	349973	671251	1.63119e+06	840946	521472	1.05874e+06	2.94135e+06	1.92124e+06	1.11608e+06	708991	1.35534e+06	236531	199605	629840	552595	426804	763488
720.079	15.5138	Procyanidin P5, m/2-0	procyanidins and flavan-3-ols	0.441116	-0.268467	-0.556875	-0.0386697	0.255237	1.2148e+06	1.83373e+06	532449	995412	863382	451986	1.08687e+06	1.83483e+06	742464	670766	1.04748e+06	679085	2.39725e+06	2.15624e+06	1.65076e+06	2.52187e+06	774991	2.05332e+06	1.25429e+06	963552	1.18727e+06	1.1321e+06	391615	694382	1.59055e+06	1.77991e+06	610495	1.61955e+06	1.19981e+06	4.03387e+06	1.26863e+06	435200	680381	993592	334372	622946
720.082	17.775	Procyanidin P5, m/2-1	procyanidins and flavan-3-ols	0.735798	-0.683891	-0.283591	-0.265869	-0.1032	1.71245e+06	1.9595e+06	2.48812e+06	1.60076e+06	3.63452e+06	3.24059e+06	4.29524e+06	7.82843e+06	8.85848e+06	3.67765e+06	3.47044e+06	3.37639e+06	7.15218e+06	3.20855e+06	6.98699e+06	4.50688e+06	9.34385e+06	3.50322e+06	2.51981e+06	5.17994e+06	3.16974e+06	7.8098e+06	3.77484e+06	5.98261e+06	1.05944e+07	1.15614e+07	1.07596e+07	6.83661e+06	1.91995e+07	1.1315e+07	6.50353e+06	7.40796e+06	5.73706e+06	6.84292e+06	2.26823e+06	2.84011e+06
720.676	15.1919	Procyanidin P5, isotope	procyanidins and flavan-3-ols	0.443929	-0.422613	-0.171999	0.0307302	0.204294	844590	1.3444e+06	584273	503559	334809	614861	646423	225955	751428	588741	529281	668125	339112	722445	591829	1.33595e+06	673199	992633	309861	1.17793e+06	1.22991e+06	436732	766967	478300	1.09064e+06	822099	1.19752e+06	834293	705423	1.95928e+06	789348	446925	114173	914631	334372	288142
864.22	20.3963	Procyanidin P6, m/2-1	procyanidins and flavan-3-ols	0.886851	-0.848881	-0.256736	-0.148581	0.0720322	189260	570301	426772	612430	297513	267588	269682	606464	207668	690056	446693	639489	1.22799e+06	757900	888343	1.048e+06	532738	351282	501027	461539	695656	666453	756201	694760	2.04814e+06	2.0033e+06	1.73543e+06	1.54723e+06	1.96776e+06	1.77223e+06	500686	591424	348621	727602	430530	1.14581e+06
865	16.3806	Procyanidin P6, m/2-1	procyanidins and flavan-3-ols	0.963611	-0.877997	-0.39289	-0.144866	0.108478	2.38514e+07	2.67335e+07	2.72608e+07	2.97189e+07	2.73856e+07	3.30122e+07	3.63297e+07	3.90468e+07	4.01939e+07	2.77211e+07	3.05625e+07	2.87592e+07	4.57549e+07	4.68655e+07	4.50214e+07	3.61024e+07	4.03826e+07	3.69867e+07	3.41298e+07	3.25671e+07	3.51951e+07	3.81997e+07	4.01585e+07	3.6778e+07	7.01722e+07	7.3648e+07	6.3391e+07	6.32039e+07	5.60465e+07	7.00827e+07	3.06606e+07	2.67969e+07	3.03384e+07	3.79347e+07	3.38482e+07	3.25072e+07
864.952	14.2938	Procyanidin P6, m/2-1	procyanidins and flavan-3-ols	0.765308	-0.68432	-0.575336	0.108961	-0.164466	4.86557e+06	6.59594e+06	2.39665e+06	7.80722e+06	4.70627e+06	7.38008e+06	7.14875e+06	6.99241e+06	9.38212e+06	6.62202e+06	7.36924e+06	7.31289e+06	1.16094e+07	1.2818e+07	1.24953e+07	1.47722e+07	1.50298e+07	8.6882e+06	6.08725e+06	9.32957e+06	1.11221e+07	1.30774e+07	1.26066e+07	9.15626e+06	1.37486e+07	1.39121e+07	1.50927e+07	1.88722e+07	1.67093e+07	1.37028e+07	6.78545e+06	4.79593e+06	3.35449e+06	6.92309e+06	3.8544e+06	3.60725e+06
426.927	14.4322	Procyanidin, fragment	procyanidins and flavan-3-ols	-0.114348	-0.0141316	0.490264	0.208519	0.528439	1.26933e+07	1.29089e+07	1.28482e+07	9.74501e+06	1.46065e+07	1.17644e+07	438026	280054	479084	157969	593624	437521	1.10069e+06	261511	497313	128598	55276.2	482383	1.58034e+06	919733	1.80151e+06	1.39203e+06	3.66943e+06	1.80649e+06	6.69563e+06	1.4732e+06	4.68443e+06	1.31477e+06	1.18789e+06	4.33455e+06	540282	806632	1.18359e+06	1.30436e+06	602685	604928
426.846	13.0273	Procyanidin, fragment	procyanidins and flavan-3-ols	-0.357672	0.267356	0.41273	0.0912731	0.200688	1.90825e+06	1.22312e+06	1.16481e+06	395634	925904	988926	1.16071e+06	339696	682939	160949	581981	441509	296108	145301	308102	352995	701711	186904	437770	1.25936e+06	567412	313837	160211	109404	218189	195953	217688	456484	277466	255008	200802	431443	462985	135307	390520	147426
866.952	16.3703	Procyanidin, isotope	procyanidins and flavan-3-ols	0.788178	-0.656433	-0.401584	-0.299407	0.0328422	2.6992e+06	4.22801e+06	1.10136e+06	3.80628e+06	2.31781e+06	4.13443e+06	4.89794e+06	6.07881e+06	5.04797e+06	4.19143e+06	4.65012e+06	4.4768e+06	6.56984e+06	6.17399e+06	3.69309e+06	5.60078e+06	5.17903e+06	5.07895e+06	4.37659e+06	2.606e+06	2.43101e+06	4.94549e+06	4.62649e+06	3.49932e+06	9.47652e+06	1.10876e+07	5.69988e+06	6.23032e+06	7.455e+06	8.79807e+06	3.20178e+06	5.41896e+06	4.14841e+06	2.15948e+06	5.32732e+06	4.81089e+06
867.976	16.3858	Procyanidin, isotope	procyanidins and flavan-3-ols	0.632454	-0.589318	-0.130163	-0.181554	0.211486	1.08461e+06	549360	433631	1.33614e+06	979156	1.0155e+06	178881	1.24257e+06	595251	880714	1.47815e+06	700401	1.96494e+06	603766	725726	550860	794547	895699	319455	1.00627e+06	608316	498598	1.14086e+06	919009	1.61159e+06	1.83502e+06	1.96372e+06	2.00356e+06	837616	1.85161e+06	667912	1.15019e+06	609212	845316	294889	799418
867.946	19.7243	Procyanidin, isotope	procyanidins and flavan-3-ols	0.592704	-0.626758	-0.0374253	0.291608	-0.249901	392976	16718	542256	202335	494852	510963	240069	328386	917492	301626	489249	442131	561753	277135	665255	90546.6	365278	106508	557973	650169	354170	1.28584e+06	974055	1.4088e+06	665838	767487	969171	1.84519e+06	535769	862264	152823	94444.6	106324	194411	98251.7	137075
463.812	19.8185	Quercetin 3-O-galactoside, isotope	flavonoids	-0.0484073	0.0693243	-0.133224	0.0157401	0.5658	5.66049e+06	1.13772e+07	6.63558e+06	8.41524e+06	1.57752e+07	1.23345e+07	6.42589e+06	4.87636e+06	1.79638e+06	2.31995e+06	3.93994e+06	4.17062e+06	9.48084e+06	7.20769e+06	6.51139e+06	7.92778e+06	1.13537e+07	6.76436e+06	5.38336e+06	1.74511e+06	4.3466e+06	2.78532e+06	2.92494e+06	3.64405e+06	1.06647e+07	3.60364e+06	7.75496e+06	2.14421e+06	5.0963e+06	7.4965e+06	4.08808e+06	3.68031e+06	3.1958e+06	6.08188e+06	3.45523e+06	5.67246e+06
462.841	19.7857	Quercetin 3-O-galactoside,	flavonoids	0.0643335	0.0281921	-0.478208	0.213335	0.55526	3.21961e+07	5.18529e+07	2.9673e+07	3.19295e+07	6.37992e+07	5.49502e+07	2.52596e+07	1.69069e+07	1.82251e+07	1.60481e+07	2.90847e+07	2.18124e+07	4.83682e+07	4.83131e+07	5.23748e+07	6.18876e+07	5.08301e+07	6.18365e+07	3.19271e+07	1.8863e+07	1.95537e+07	3.271e+07	3.8456e+07	2.66997e+07	4.53601e+07	4.2887e+07	3.44935e+07	3.18922e+07	3.44626e+07	3.46665e+07	3.34103e+07	2.37754e+07	3.55305e+07	3.36271e+07	3.43115e+07	2.909e+07
464.821	19.7975	Quercetin 3-O-galactoside, isotope	flavonoids	0.0233347	0.0229936	-0.170184	-0.0699725	0.542013	1.09157e+06	1.66128e+06	1.42104e+06	582879	1.00421e+06	2.55353e+06	682570	414513	1.2337e+06	152017	987109	607949	1.19545e+06	1.88144e+06	640470	1.38942e+06	1.84791e+06	1.27363e+06	487651	375686	887109	854229	316361	846550	988839	808759	1.80429e+06	1.1789e+06	958168	1.583e+06	1.87351e+06	1.45244e+06	2.44371e+06	522487	1.05387e+06	591054
608.873	19.3559	Quercetin 3-O-rutinoside	flavonoids	-0.268989	0.346579	-0.43135	0.417479	0.351186	3.9572e+06	6.39756e+06	4.54944e+06	2.58485e+06	9.04667e+06	6.23417e+06	713058	836622	378946	421308	738913	717654	7.79391e+06	6.62595e+06	6.45852e+06	7.62135e+06	8.6588e+06	5.0451e+06	3.66976e+06	1.70579e+06	1.7633e+06	2.67402e+06	3.0548e+06	2.88579e+06	1.2667e+06	1.01148e+06	706570	937381	856216	1.13442e+06	1.43229e+06	638424	1.14892e+06	630886	1.87686e+06	1.21684e+06
612.844	19.8085	Quercetin 3-O-rutinoside, isotope	flavonoids	0.144867	-0.189033	0.0776937	0.51406	-0.180912	558469	529120	366972	1.33513e+06	649125	555962	242780	423753	198495	439074	299532	617028	327977	964933	406682	717638	712655	371000	823647	1.64466e+06	867743	2.73885e+06	245701	741872	516709	908045	449154	769162	854998	592585	256086	281933	1.02511e+06	760420	440487	380833
446.861	21.7336	Quercetin-O-deoxyhexoside	flavonoids	0.598787	-0.459811	-0.547105	-0.493028	-0.305788	1.2288e+07	1.51313e+07	1.12007e+07	1.0715e+07	1.6501e+07	1.63008e+07	2.53943e+07	3.0821e+07	2.78164e+07	2.11611e+07	2.77389e+07	3.20497e+07	2.47837e+07	2.48047e+07	2.7557e+07	2.57056e+07	2.22554e+07	2.37945e+07	1.52401e+07	1.4264e+07	1.73232e+07	2.21257e+07	1.73548e+07	1.99594e+07	3.29527e+07	2.99559e+07	2.96073e+07	2.31598e+07	2.95501e+07	2.92248e+07	1.67762e+07	1.34088e+07	1.57598e+07	1.35739e+07	1.84422e+07	1.44032e+07
450.868	21.4413	Quercetin-O-deoxyhexoside	flavonoids	0.16666	-0.125595	0.0588099	-0.408426	-0.243411	974300	386420	798601	2.76655e+06	2.55265e+06	2.90137e+06	4.23773e+06	9.06686e+06	5.95642e+06	941848	2.28053e+06	2.63133e+06	600543	1.96572e+06	356496	1.11549e+06	978752	598223	1.81376e+06	569621	990662	1.29295e+06	1.59669e+06	1.88033e+06	2.48258e+06	2.07167e+06	2.51706e+06	2.55771e+06	1.01489e+06	3.0998e+06	484102	720221	992975	657116	984130	1.01657e+06
432.856	21.4798	Quercetin-O-pentoside 1+2	flavonoids	0.670211	-0.659502	-0.0859884	-0.117333	0.585699	1.75053e+07	2.27426e+07	1.66409e+07	1.75459e+07	2.8694e+07	2.79757e+07	1.70445e+07	1.35216e+07	1.45143e+07	9.87689e+06	1.52471e+07	1.15277e+07	1.58171e+07	1.78991e+07	1.84773e+07	1.8154e+07	1.71734e+07	2.56834e+07	1.60688e+07	1.28538e+07	1.03329e+07	1.76915e+07	1.66097e+07	1.41776e+07	3.69327e+07	3.00379e+07	3.04377e+07	2.51789e+07	2.51708e+07	3.06536e+07	1.78337e+07	1.66892e+07	2.00209e+07	1.51282e+07	1.70345e+07	1.50987e+07
476.855	21.4437	Rhamnetin 3-O-glucoside	flavonoids	-0.202097	0.303873	-0.52977	0.227283	-0.63694	191688	123907	121438	318406	267234	292100	2.91409e+06	3.03571e+06	3.01868e+06	2.82422e+06	3.39661e+06	4.45711e+06	3.54165e+06	3.85967e+06	4.12654e+06	3.65623e+06	4.13769e+06	3.2315e+06	4.1804e+06	2.10994e+06	2.64559e+06	4.24883e+06	3.38042e+06	5.23618e+06	398431	195697	375755	770437	567460	1.16854e+06	677137	764158	892388	1.38888e+06	1.44944e+06	1.03371e+06
440.932	16.0779								3.34385e+07	3.90397e+07	2.97456e+07	2.03656e+07	1.64213e+07	1.94531e+07	1.96157e+06	1.87659e+06	2.92035e+06	1.51109e+06	873333	497850	30760.4	140163	218585	98421	71841.6	149189	7.203e+06	7.39733e+06	4.69344e+06	3.00876e+06	1.94971e+06	1.42868e+06	1.4552e+06	616768	1.17322e+06	587017	1.10071e+06	439122	363761	268640	843157	901293	568004	940095
564.774	7.82951								1.67878e+07	1.62617e+07	1.7772e+07	2.01782e+07	1.97071e+07	1.71525e+07	2.31671e+07	2.55402e+07	2.46355e+07	1.45167e+07	1.78401e+07	1.77335e+07	2.95945e+07	3.31857e+07	3.22479e+07	2.65268e+07	2.56644e+07	2.64739e+07	2.50388e+07	2.33704e+07	2.36587e+07	2.51222e+07	2.59785e+07	2.92583e+07	1.94169e+07	1.9304e+07	1.61406e+07	2.45701e+07	2.90026e+07	2.92825e+07	2.11575e+07	1.54801e+07	2.31191e+07	2.71886e+07	3.26333e+07	3.02826e+07
562.977	15.012								1.25127e+07	1.27867e+07	1.34244e+07	1.18509e+07	1.4621e+07	1.83922e+07	2.42905e+07	2.10136e+07	2.00199e+07	1.97665e+07	2.085e+07	2.43188e+07	1.01658e+07	1.02008e+07	1.10841e+07	1.20075e+07	9.14383e+06	1.03409e+07	2.47492e+07	2.19782e+07	2.24112e+07	2.7836e+07	2.82588e+07	3.69771e+07	1.13496e+07	1.29477e+07	1.12426e+07	1.93942e+07	1.41991e+07	1.60525e+07	3.12831e+07	2.98637e+07	2.99417e+07	2.94464e+07	2.89462e+07	3.43019e+07
602.902	16.1103								8.6902e+06	7.19843e+06	5.2349e+06	3.91538e+06	2.56375e+06	2.58532e+06	199144	118198	178778	171656	271650	123568	164308	96391.1	144931	255162	407403	70131.5	258104	802102	622451	290084	43443.3	414011	342748	1.06102e+06	272095	226425	254687	183301	370505	286468	274785	173117	173377	166499
454.961	20.5414								8.11407e+06	6.28367e+06	6.44509e+06	3.61134e+06	2.73118e+06	4.2906e+06	6.47212e+06	4.71067e+06	4.53556e+06	8.32541e+06	7.25501e+06	7.97054e+06	204876	194717	98244.5	202636	84282.8	65114.2	2.06726e+06	1.47086e+06	1.95664e+06	866336	1.02824e+06	906679	4.1603e+06	3.53163e+06	2.8707e+06	1.80962e+06	1.34173e+06	1.16884e+06	2.61218e+06	1.48653e+06	1.60301e+06	1.19915e+06	909959	1.0669e+06
610.985	17.5735								7.9229e+06	7.72952e+06	7.31062e+06	1.14337e+07	1.29155e+07	1.2487e+07	919403	1.29927e+06	839200	1.2126e+06	1.37893e+06	1.15815e+06	1.48588e+06	1.59661e+06	1.97224e+06	1.68292e+06	3.09599e+06	1.86958e+06	980691	1.49342e+06	1.00594e+06	1.05741e+06	1.12596e+06	708248	312959	735735	283298	546159	259061	400485	1.00266e+06	785620	1.03947e+06	870709	1.18815e+06	1.89328e+06
428.939	22.3005								7.68787e+06	8.53154e+06	1.06185e+07	9.8674e+06	1.20297e+07	1.11688e+07	1.13741e+07	1.40096e+07	1.01908e+07	1.68688e+07	1.8351e+07	1.73125e+07	9.96942e+06	1.04497e+07	1.09595e+07	1.02668e+07	1.00355e+07	1.04517e+07	1.54445e+07	1.22164e+07	1.28538e+07	2.50083e+07	2.08772e+07	2.50004e+07	1.41018e+07	1.70224e+07	1.26823e+07	1.55389e+07	1.83737e+07	1.73039e+07	1.26506e+07	1.30627e+07	1.44985e+07	1.78953e+07	1.80501e+07	1.77537e+07
665.061	31.7155								6.90213e+06	8.74709e+06	7.30441e+06	6.83878e+06	8.99491e+06	1.10459e+07	913529	4.67619e+06	2.4113e+06	873335	1.32224e+06	656657	1.57126e+06	1.5135e+06	2.8277e+06	229039	365191	308944	4.62002e+06	4.31832e+06	7.76866e+06	2.96498e+06	2.90663e+06	2.74379e+06	9.93287e+06	1.75705e+07	1.59346e+07	3.70269e+06	1.14963e+07	1.34092e+07	5.19741e+06	2.20586e+06	6.52303e+06	5.09759e+06	4.10316e+06	2.48541e+06
488.114	29.8206								6.44815e+06	5.37354e+06	5.02175e+06	5.71677e+06	8.75656e+06	7.87214e+06	5.83801e+06	4.75159e+06	2.03135e+06	1.88818e+06	3.03204e+06	3.30592e+06	868987	339663	1.51817e+06	267568	318940	178027	934180	1.6151e+06	816387	705830	283649	139503	2.97448e+06	7.58167e+06	6.95474e+06	1.13796e+07	2.65121e+06	5.38887e+06	1.8862e+06	2.07894e+06	1.46789e+06	1.0729e+06	828666	818396
667.075	30.0469								5.72523e+06	5.50976e+06	6.01184e+06	5.55485e+06	4.79341e+06	5.43263e+06	1.74016e+06	4.14252e+06	2.89131e+06	1.63503e+06	1.19324e+06	2.06971e+06	276084	561108	889690	264157	265656	529486	561953	445969	338360	756817	165997	327111	2.44703e+06	6.24974e+06	4.10733e+06	7.29176e+06	1.44665e+06	3.32775e+06	1.48366e+06	1.08546e+06	1.67549e+06	581305	679576	600205
472.861	23.1698								5.59693e+06	5.76278e+06	6.18473e+06	6.74907e+06	6.53555e+06	7.29817e+06	5.31054e+06	9.80193e+06	6.8754e+06	3.01755e+06	4.72307e+06	7.23004e+06	2.26647e+06	4.41586e+06	3.08705e+06	3.05133e+06	3.20942e+06	2.02702e+06	4.26354e+06	3.57656e+06	2.50804e+06	6.01204e+06	3.6772e+06	2.77969e+06	5.35041e+06	5.46066e+06	5.45945e+06	1.54607e+06	8.72414e+06	8.26942e+06	2.98711e+06	3.18605e+06	2.83714e+06	3.3158e+06	8.85667e+06	2.51886e+06
430.88	16.0737								5.02096e+06	5.3592e+06	4.73831e+06	3.36197e+06	2.19245e+06	1.79599e+06	453992	260612	247368	89226.6	193344	161905	158351	105848	461237	70143.6	250636	80590.4	1.01842e+06	359653	645286	145830	101048	190462	184344	74124.3	357308	725920	327502	231225	309583	109088	242236	112714	333862	281865
468.805	15.3777								4.97068e+06	4.82932e+06	4.38528e+06	4.05876e+06	3.59356e+06	4.31146e+06	2.03471e+06	1.60443e+06	2.94588e+06	3.75955e+06	1.69048e+06	4.51483e+06	2.638e+06	3.16536e+06	3.30663e+06	2.03853e+06	2.06075e+06	2.89898e+06	5.35484e+06	2.61349e+06	3.11773e+06	7.74216e+06	6.54421e+06	6.9509e+06	4.06245e+06	3.10835e+06	2.62125e+06	2.75814e+06	4.5008e+06	5.56032e+06	2.01037e+06	1.60964e+06	611719	3.11064e+06	2.10861e+06	2.55232e+06
563.925	14.9994								4.67985e+06	2.09015e+06	2.7372e+06	4.21344e+06	5.6237e+06	4.45568e+06	7.49799e+06	6.4559e+06	5.79428e+06	7.23118e+06	7.42811e+06	2.22392e+06	3.3772e+06	3.77398e+06	3.3033e+06	3.68925e+06	3.81517e+06	1.03255e+06	9.46869e+06	7.59836e+06	7.27328e+06	8.96053e+06	1.18161e+07	1.26215e+07	5.502e+06	3.33029e+06	2.09325e+06	2.79757e+06	2.56624e+06	6.87452e+06	1.0608e+07	9.10663e+06	9.22688e+06	7.911e+06	1.01314e+07	1.32666e+07
546.924	20.4331								4.58345e+06	6.83457e+06	4.5976e+06	6.2676e+06	8.0392e+06	6.18387e+06	4.83719e+06	7.25972e+06	4.59907e+06	6.85407e+06	8.26997e+06	1.17161e+07	5.82559e+06	5.67576e+06	3.97982e+06	3.64609e+06	6.83633e+06	3.4479e+06	9.8184e+06	8.52759e+06	9.1934e+06	1.53048e+07	1.85081e+07	1.96774e+07	9.14748e+06	5.28651e+06	5.4521e+06	1.16437e+07	1.34724e+07	1.20191e+07	5.00775e+06	4.33855e+06	8.48795e+06	1.27673e+07	1.52718e+07	1.5957e+07
516.969	14.994								3.3162e+06	3.01685e+06	1.5452e+06	3.85334e+06	3.83421e+06	4.36635e+06	6.18307e+06	4.05872e+06	5.19e+06	5.43481e+06	5.6002e+06	6.73677e+06	1.72716e+06	2.02047e+06	3.54366e+06	1.58421e+06	2.80859e+06	1.61832e+06	5.70413e+06	6.76304e+06	5.85993e+06	8.1942e+06	9.30363e+06	9.29368e+06	2.8851e+06	3.88938e+06	2.00055e+06	4.06983e+06	4.44342e+06	3.67109e+06	5.29593e+06	8.17028e+06	9.35711e+06	8.2591e+06	6.84057e+06	8.19221e+06
404.964	20.1609								3.10828e+06	3.51783e+06	3.05388e+06	3.98018e+06	3.99791e+06	3.88325e+06	4.92264e+06	4.59696e+06	4.50506e+06	4.02424e+06	4.27183e+06	4.11396e+06	2.14747e+06	2.18039e+06	2.33158e+06	1.62768e+06	2.11819e+06	1.83601e+06	6.37918e+06	7.64039e+06	6.50719e+06	8.48896e+06	1.03157e+07	7.41667e+06	2.15006e+06	1.27203e+06	1.45403e+06	1.41224e+06	1.3711e+06	1.62388e+06	8.43315e+06	8.1787e+06	7.36005e+06	7.86521e+06	7.0244e+06	5.90462e+06
497.86	23.12								3.07431e+06	1.50668e+06	5.12222e+06	5.01182e+06	3.2508e+06	3.70005e+06	7.14359e+06	9.4334e+06	9.22686e+06	8.69874e+06	9.16601e+06	7.30864e+06	2.36232e+06	2.8869e+06	1.68228e+06	5.11813e+06	1.40736e+06	2.37454e+06	2.65587e+06	2.72301e+06	3.80883e+06	3.37448e+06	2.10355e+06	3.25601e+06	6.26844e+06	6.41168e+06	6.88797e+06	7.21889e+06	6.70121e+06	7.66956e+06	3.19486e+06	4.23517e+06	4.05454e+06	3.00254e+06	5.37593e+06	2.15541e+06
336.862	14.4837								2.84904e+06	2.02376e+06	3.92446e+06	1.60591e+06	4.51439e+06	3.28625e+06	3.0576e+06	3.26988e+06	3.67571e+06	4.57083e+06	6.26458e+06	8.45974e+06	1.9893e+06	825007	1.68815e+06	1.76911e+06	1.31186e+06	412915	4.61699e+06	1.11936e+06	2.63409e+06	3.15723e+06	3.18757e+06	2.48562e+06	2.3299e+07	2.10923e+07	1.244e+07	1.80501e+07	6.3795e+06	1.43747e+07	9.07301e+06	1.33671e+07	8.04769e+06	1.137e+07	1.64176e+07	1.29267e+07
378.845	4.72514								2.56182e+06	5.13842e+06	1.48348e+06	3.10538e+06	2.31255e+06	2.93463e+06	2.31865e+06	2.16518e+06	1.78506e+06	2.03343e+06	1.15655e+06	450722	2.27609e+06	1.31702e+06	2.24658e+06	2.11073e+06	1.73926e+06	1.37675e+06	1.39128e+06	3.87085e+06	3.15499e+06	1.06386e+06	2.58378e+06	3.49508e+06	3.03123e+06	3.04851e+06	2.16618e+06	664707	6.06226e+06	2.81279e+06	1.14513e+06	2.34952e+06	1.5284e+06	2.5475e+06	6.93382e+06	5.34494e+06
641.059	30.145								2.54878e+06	2.33821e+06	3.51276e+06	625437	517354	268701	127116	322789	230618	1.8884e+07	2.32439e+07	1.11728e+07	1.6997e+07	1.52538e+07	1.68433e+07	1.80884e+07	2.10682e+07	1.52841e+07	9.96126e+06	7.63162e+06	1.06797e+07	9.50489e+06	498245	412503	317172	224643	227261	7.0356e+06	201032	187359	423135	224168	142059	258813	76959.9	248511
387.84	4.65095								2.2817e+06	2.01156e+06	751995	1.06831e+06	785712	2.32124e+06	1.67604e+06	1.7679e+06	491649	553197	2.47076e+06	1.55546e+06	2.24532e+06	1.96333e+06	1.4123e+06	313839	775047	1.18139e+06	1.18246e+06	4.08525e+06	1.87384e+06	1.66743e+06	1.17304e+06	2.57384e+06	1.75461e+06	2.64696e+06	2.33334e+06	1.61414e+06	2.10882e+06	3.31458e+06	855227	7.64027e+06	1.5445e+06	2.39952e+06	2.14509e+06	4.01133e+06
427.88	15.195								2.27917e+06	537389	462073	736177	459072	957318	132784	226177	125466	53465.9	42714.4	0	199902	205719	47179	69185.1	58238.3	88472.4	718851	654781	275484	834564	396406	459285	97168.4	48948	641559	246234	0	318862	59365.7	274641	153423	356415	28113.6	390440
647.046	31.717								2.14075e+06	2.32888e+06	2.51526e+06	2.45564e+06	3.66769e+06	3.51652e+06	1.98859e+06	1.65801e+06	1.02068e+06	1.07938e+06	975997	537490	416304	828619	390151	525438	268705	203601	1.9815e+06	1.85277e+06	1.73121e+06	421023	1.07191e+06	1.23558e+06	5.49178e+06	4.75174e+06	4.09065e+06	1.75029e+06	2.79941e+06	2.65296e+06	2.22435e+06	1.74136e+06	2.57509e+06	1.16571e+06	1.62193e+06	1.52358e+06
738.921	18.3112								2.04482e+06	1.76268e+06	1.59597e+06	2.60242e+06	2.40303e+06	2.8266e+06	1.54309e+06	2.30619e+06	2.50845e+06	1.16782e+06	2.11415e+06	2.31296e+06	1.76577e+06	2.2816e+06	542697	1.86368e+06	1.11831e+06	1.05836e+06	4.04718e+06	4.78356e+06	3.45076e+06	8.34592e+06	8.23707e+06	7.16778e+06	3.91229e+06	5.01583e+06	4.30391e+06	8.41605e+06	8.97133e+06	6.48521e+06	1.18958e+06	1.19493e+06	900528	1.50704e+06	1.27592e+06	1.22574e+06
432.865	16.1001								2.03801e+06	910942	1.22216e+06	822763	364829	1.04999e+06	154578	267377	92116.7	157370	233941	151108	255144	94507	120527	127822	485618	130645	332219	540524	336936	393048	210753	259485	187099	182420	158103	214644	127809	146255	208393	58314.4	70933.5	124648	184370	404439
450.879	23.7591								1.97661e+06	2.56326e+06	2.73975e+06	2.42465e+06	2.84664e+06	2.86097e+06	1.23247e+06	1.71123e+06	1.55285e+06	1.77241e+06	2.08339e+06	1.46064e+06	1.05322e+06	1.82974e+06	556801	1.68319e+06	2.03246e+06	705889	4.31849e+06	4.25862e+06	3.17727e+06	6.99679e+06	5.34279e+06	6.32437e+06	4.66392e+06	7.03087e+06	4.35992e+06	6.47332e+06	6.45761e+06	5.90279e+06	876868	1.07222e+06	1.02033e+06	1.97281e+06	1.42621e+06	1.06957e+06
484.976	18.8527								1.93449e+06	941669	1.25884e+06	1.76534e+06	1.85133e+06	1.95396e+06	111095	146466	94449.5	819756	717475	1.63366e+06	2.13178e+06	1.2013e+06	841784	264575	465416	322951	768548	1.39417e+06	1.17561e+06	1.7255e+06	2.45793e+06	1.04963e+06	1.13027e+07	2.34342e+07	8.22652e+06	5.19948e+06	4.67667e+06	5.94562e+06	124045	78678.7	163791	209392	223253	482367
96.7436	13.0731								1.88486e+06	656274	390498	1.6414e+06	675258	1.51628e+06	569267	1.46164e+06	400934	172371	809963	473074	213109	438394	502976	291896	404405	786948	699336	1.05332e+06	808906	812518	1.13081e+06	1.53107e+06	1.06068e+06	473883	2.92499e+06	1.7388e+06	626350	1.04345e+06	284345	499412	405441	813927	847724	581858
728.875	13.1265								1.88276e+06	2.35957e+06	4.62464e+06	3.06014e+06	3.01153e+06	5.42519e+06	1.63756e+06	1.34111e+06	4.06418e+06	1.31606e+06	553154	807980	953160	1.07346e+06	913245	363355	1.00784e+06	1.07088e+06	881093	4.16022e+06	1.33851e+06	1.55253e+06	874451	1.54403e+06	1.47628e+06	2.2837e+06	1.91233e+06	1.74249e+06	4.83973e+06	1.44621e+06	1.02082e+06	755336	1.83988e+06	1.86189e+06	711702	2.05504e+06
666.078	31.6719								1.82514e+06	3.58047e+06	2.6831e+06	3.54384e+06	1.66668e+06	4.01166e+06	857043	982508	381036	342686	364807	689077	545393	561119	289967	350885	182706	281741	2.63963e+06	1.57764e+06	3.0958e+06	509742	699293	531147	3.71391e+06	6.50608e+06	3.55658e+06	1.93656e+06	2.80661e+06	4.63297e+06	1.00911e+06	476107	2.3867e+06	1.13238e+06	916687	1.4156e+06
440.954	19.1851								1.79123e+06	2.20421e+06	1.73634e+06	1.98127e+06	2.32172e+06	2.50444e+06	766507	1.10777e+06	334132	2.34548e+06	3.29635e+06	2.55946e+06	151304	173565	313664	219289	275711	94102.6	814902	716908	347530	445198	927708	426138	1.39438e+07	1.59543e+07	1.25074e+07	3.6597e+06	3.86685e+06	4.87222e+06	2.35272e+06	3.0879e+06	3.57047e+06	6.68379e+06	6.39119e+06	5.70299e+06
480.812	14.7688								1.77072e+06	1.96261e+06	846942	516535	362131	1.68265e+06	196304	230253	447772	168022	231277	290145	192280	200703	347780	225347	409902	238882	2.63192e+06	1.48902e+06	1.11702e+06	4.52721e+06	1.84531e+06	2.17375e+06	3.21774e+06	1.50274e+06	1.87908e+06	900618	3.40332e+06	1.93996e+06	757647	637534	2.05702e+06	982700	830681	942158
702.783	14.7413								1.75546e+06	701214	971279	493731	985700	688215	362765	458157	34973.3	165034	237410	350452	112147	23554.1	353015	89580.4	221341	122174	1.17759e+06	1.14573e+06	433446	1.03759e+06	716129	493762	41265.5	1.04638e+06	175805	167331	289338	252543	210339	88175.5	200441	340061	244283	220873
752.802	19.7061								1.73023e+06	4.00688e+06	1.53747e+06	2.34035e+06	3.03703e+06	4.16209e+06	2.16312e+06	2.67922e+06	3.20148e+06	639488	1.08629e+06	560669	1.35458e+06	2.21901e+06	1.5522e+06	1.03567e+06	1.88772e+06	1.09927e+06	3.85914e+06	3.59447e+06	1.63012e+06	7.5982e+06	7.89021e+06	7.12643e+06	5.0753e+06	5.00701e+06	3.33828e+06	7.5012e+06	1.14592e+07	7.32515e+06	682283	476681	501035	701157	961856	1.03192e+06
559.013	28.3391								1.65461e+06	2.01761e+06	2.12767e+06	991902	1.27555e+06	1.26851e+06	586442	245983	244321	161108	95293.2	124004	109553	119726	142655	113478	158926	201231	213870	382775	209990	174411	77015.3	302645	840118	902361	723517	935255	183576	479570	169386	124436	138980	248706	272525	118083
470.781	15.6894								1.64624e+06	1.43974e+06	958153	1.47111e+06	715703	855719	396784	326370	364104	296738	356784	691461	394629	494330	461944	161963	292467	414245	374147	880733	275688	416633	711014	434064	357524	408967	1.89518e+06	1.47465e+06	1.59692e+06	1.15729e+06	264910	703252	684030	364246	519235	519925
604.83	21.7422								1.56252e+06	796567	2.01296e+06	1.87628e+06	1.34706e+06	1.92579e+06	2.10247e+06	1.31539e+06	1.63078e+06	913388	812264	1.69694e+06	1.82955e+06	2.14765e+06	1.55158e+06	986024	1.23701e+06	864862	3.16476e+06	1.39802e+06	2.07031e+06	1.6856e+06	1.38686e+06	2.72271e+06	3.5301e+06	2.82539e+06	1.56647e+06	4.32077e+06	4.38811e+06	4.56594e+06	1.26522e+06	2.21644e+06	1.09222e+06	1.71639e+06	1.96114e+06	1.21128e+06
180.735	4.87538								1.56245e+06	2.172e+06	776833	2.29391e+06	557133	1.38103e+06	307979	347375	245441	579803	638328	777445	608335	793530	319438	298074	302604	287317	234326	525756	623623	1.63411e+06	700646	1.62324e+06	1.12373e+06	768655	310619	452160	700367	682659	493845	466690	202071	415023	1.40484e+06	1.32634e+06
870.984	23.1055								1.5529e+06	1.21275e+06	3.38943e+06	1.40165e+06	1.01648e+06	3.0366e+06	4.57737e+06	1.28266e+07	1.06937e+07	2.06474e+06	3.30465e+06	4.24539e+06	596375	3.25482e+06	392566	1.30857e+06	971845	432294	479160	1.16136e+06	2.17866e+06	1.23829e+06	1.02556e+06	1.68116e+06	3.46308e+06	3.20705e+06	4.55269e+06	4.8475e+06	3.00577e+06	6.30983e+06	812457	855888	1.85316e+06	819163	3.08273e+06	351377
614.832	14.7386								1.54837e+06	796419	993652	528451	562044	542193	879387	999315	1.44605e+06	611896	2.20836e+06	2.46333e+06	463081	530732	1.07007e+06	569339	547176	782753	1.99594e+06	1.36252e+06	880633	4.38392e+06	1.94022e+06	2.32761e+06	1.24757e+06	411757	660424	1.32169e+06	1.07709e+06	568131	2.38165e+06	1.97309e+06	3.75487e+06	598760	1.62221e+06	3.06591e+06
708.894	23.5053								1.53299e+06	791209	932761	334301	214861	659462	228033	1.46385e+06	188221	800898	542908	1.2015e+06	3.42712e+06	4.49047e+06	3.67581e+06	975621	2.27346e+06	3.36285e+06	4.26393e+06	4.98877e+06	6.28127e+06	2.76665e+06	758810	883136	1.48325e+06	2.30457e+06	1.55839e+06	3.08617e+06	1.42027e+06	1.87051e+06	643674	182862	291603	2.61013e+06	994570	1.06395e+06
575.876	14.9074								1.52779e+06	2.37415e+06	1.25416e+06	1.92958e+06	2.01272e+06	837388	766722	1.27518e+06	1.90942e+06	776817	896233	2.13128e+06	1.3694e+06	1.58081e+06	3.22355e+06	5.19827e+06	567834	1.85597e+06	663300	1.38668e+06	1.2837e+06	4.19616e+06	2.24968e+06	3.84022e+06	1.37256e+06	3.0257e+06	1.27557e+06	3.27966e+06	5.03666e+06	5.65013e+06	1.2311e+06	1.14931e+06	1.05261e+06	1.91275e+06	751199	1.10997e+06
552.949	15.0012								1.51088e+06	1.31672e+06	1.52305e+06	2.90429e+06	3.39364e+06	1.65106e+06	2.45381e+06	848721	2.97038e+06	2.32073e+06	851351	1.56681e+06	1.68617e+06	2.13321e+06	916861	704945	2.16485e+06	239880	4.15245e+06	2.66763e+06	888071	1.59144e+06	3.33416e+06	6.28753e+06	1.54359e+06	471483	1.198e+06	605614	1.91058e+06	1.35589e+06	2.19465e+06	2.59006e+06	2.54885e+06	1.62859e+06	2.38622e+06	2.12706e+06
575.904	13.4924								1.50194e+06	384595	823763	612026	1.07359e+06	1.60107e+06	998836	961695	880902	355871	619398	492440	551366	839499	1.15304e+06	3.46573e+06	544650	1.52552e+06	3.12045e+06	765221	439852	824076	978396	1.47818e+06	1.64237e+06	1.666e+06	1.31704e+06	1.26725e+06	1.23325e+06	2.16721e+06	314722	921202	557740	545759	2.98955e+06	2.58732e+06
928.9	14.6628								1.38637e+06	899866	998813	1.25504e+06	663684	1.41183e+06	395720	316395	898428	417948	245194	344819	197067	257480	746288	694908	587958	359366	1.29654e+06	1.43724e+06	1.65629e+06	365260	1.73212e+06	1.6795e+06	2.5683e+06	1.5231e+06	2.4304e+06	2.0455e+06	2.14616e+06	1.35642e+06	714530	762594	414593	597742	527521	362756
803.172	28.8973								1.38443e+06	341442	350910	262148	189236	130181	194758	371452	301256	5.18585e+06	7.13588e+06	2.06939e+06	3.52652e+06	4.41163e+06	4.0693e+06	2.94815e+06	5.40645e+06	3.67234e+06	4.38429e+06	2.58753e+06	3.66355e+06	5.31255e+06	306559	314648	188659	242126	269237	2.98319e+06	124821	96533.3	179496	119138	227048	442041	110687	76417.2
678.737	15.7213								1.34292e+06	1.16762e+06	1.47523e+06	2.16107e+06	1.39716e+06	2.29322e+06	1.50348e+06	1.08797e+06	1.21419e+06	559815	508353	465029	549104	293446	160339	256575	405517	143949	2.21921e+06	338929	2.15023e+06	861319	527862	654093	3.05957e+06	1.33548e+06	887867	1.9322e+06	2.50483e+06	2.78107e+06	1.53164e+06	1.62118e+06	1.30193e+06	368957	807127	1.2188e+06
464.826	13.9974								1.31949e+06	1.71861e+06	1.23009e+06	489116	882672	1.04716e+06	173778	769600	187011	194733	473540	188552	424638	794177	1.38298e+06	640933	457922	1.00146e+06	2.02661e+06	4.75746e+06	2.49007e+06	2.97744e+06	1.12035e+06	3.30087e+06	1.45803e+06	1.3972e+06	1.16718e+06	1.94907e+06	605827	958228	574037	737844	1.5031e+06	454712	257601	209562
450.867	19.26								1.31488e+06	948790	1.03295e+06	1.17289e+06	848737	977741	484594	825669	1.46121e+06	776693	1.05261e+06	1.3484e+06	1.20913e+06	324739	850132	468806	643860	787406	1.40367e+06	1.40276e+06	893877	2.25358e+06	2.09551e+06	2.64041e+06	2.00438e+06	1.6445e+06	1.59747e+06	2.65676e+06	2.59757e+06	1.86047e+06	1.33425e+06	799200	654350	997902	1.07595e+06	1.18132e+06
674.808	14.4148								1.28997e+06	2.46345e+06	867863	841055	2.09828e+06	2.3209e+06	4.39765e+06	5.22769e+06	5.62277e+06	5.53036e+06	6.98758e+06	3.65823e+06	3.35417e+06	4.57338e+06	748813	7.42939e+06	1.43474e+06	3.32386e+06	2.22457e+06	3.84316e+06	5.13571e+06	5.3321e+06	2.04714e+06	5.75952e+06	1.48157e+07	1.36987e+07	1.0654e+07	3.2119e+06	6.05208e+06	2.41259e+06	3.0179e+06	7.05703e+06	6.14887e+06	5.32139e+06	8.85473e+06	8.88505e+06
914.915	14.4508								1.2445e+06	409279	675634	337563	226365	1.11702e+06	840947	1.18334e+06	2.2489e+06	631429	820976	909886	1.12746e+06	1.52771e+06	652784	497537	1.28841e+06	709629	1.10224e+06	261998	309440	1.28357e+06	844701	557373	9.40069e+06	5.60581e+06	7.84885e+06	3.06907e+06	1.67664e+06	1.25559e+06	1.60109e+06	1.49343e+06	1.63728e+06	1.96814e+06	1.38537e+06	2.11759e+06
590.944	18.7155								1.23114e+06	472102	943741	1.6057e+06	1.38763e+06	2.13456e+06	1.0156e+06	1.09248e+06	993175	1.03065e+06	1.42097e+06	1.08055e+06	3.26753e+06	3.10517e+06	3.17552e+06	4.64953e+06	4.18826e+06	5.0029e+06	3.2113e+06	2.06996e+06	2.33656e+06	5.01668e+06	4.61231e+06	4.27781e+06	1.5447e+06	639447	1.61154e+06	2.22617e+06	2.32357e+06	1.89197e+06	1.40395e+06	1.23554e+06	1.72598e+06	2.15932e+06	1.68174e+06	2.00253e+06
351.893	14.9523								1.22288e+06	2.0579e+06	2.28171e+06	418415	1.0878e+06	2.28794e+06	736491	579052	1.34915e+06	530730	556930	580052	976498	789964	600231	453782	835392	861118	1.46572e+06	1.70952e+06	2.25078e+06	1.09488e+06	1.37052e+06	1.61069e+06	1.70699e+06	697867	1.32102e+06	711758	1.06725e+06	703522	1.04121e+06	553281	808447	507982	613567	908442
739.888	18.3642								1.21551e+06	997584	538063	1.08304e+06	639505	1.49478e+06	396043	806220	1.11137e+06	538774	832119	574696	505800	1.26064e+06	314793	442903	539923	825254	1.39894e+06	1.88459e+06	1.63091e+06	2.02439e+06	2.75955e+06	2.52226e+06	974743	1.9034e+06	1.86756e+06	2.31323e+06	2.34904e+06	3.20671e+06	257064	279591	323037	193653	771006	241134
472.766	13.1185								1.20959e+06	1.07528e+06	412874	245634	482335	805072	377112	261258	585542	832263	1.16758e+06	494045	577786	670420	301837	587659	523376	922688	869611	1.65629e+06	1.05713e+06	452605	563982	654922	878185	916931	692143	234790	541419	261797	640251	742987	441729	3.44826e+06	1.71339e+06	1.07167e+06
668.129	30.1122								1.20684e+06	999033	1.88797e+06	1.38487e+06	2.02027e+06	1.71297e+06	770889	313217	1.13062e+06	201379	666206	840196	149779	216133	157068	76383.3	113809	73760.4	210249	361757	174021	164783	110423	283251	518296	2.90564e+06	1.58966e+06	1.85328e+06	1.03828e+06	675694	957795	254355	682108	539360	376190	501756
1014.98	21.7274								1.20371e+06	698251	348447	187230	423882	659025	949763	1.37474e+06	1.01542e+06	1.76992e+06	934756	977884	329792	498928	322356	436456	1.42837e+06	1.81088e+06	801864	250360	610392	1.77726e+06	925999	401305	1.57928e+06	2.42191e+06	1.87539e+06	2.4589e+06	3.15959e+06	931277	1.23236e+06	204916	182736	981910	986500	427708
473.837	23.1095								1.19048e+06	472635	1.93147e+06	1.18732e+06	2.32866e+06	1.35415e+06	1.33938e+06	857402	1.45704e+06	639273	2.16414e+06	610019	838882	1.12429e+06	1.24814e+06	1.03223e+06	446219	277803	600810	848826	2.11527e+06	1.4302e+06	766638	412513	1.02942e+06	751873	533834	2.28414e+06	2.20016e+06	1.33036e+06	755508	254462	245513	244113	2.10075e+06	490995
688.703	14.6347								1.17845e+06	396315	206086	247704	319863	389598	437439	605347	333615	138088	292073	62020	81908.6	41096.7	167015	182728	0	96510.4	255426	984171	505215	512751	258054	559620	1.50114e+06	1.8946e+06	1.75436e+06	296108	1.22756e+06	1.22534e+06	335942	471540	179687	387619	270420	894210
350.926	12.8308								1.1774e+06	1.03334e+06	721611	527083	1.27173e+06	722740	713451	640560	408643	203205	922354	452716	199968	675290	272941	286240	523574	726079	1.75365e+06	2.33576e+06	931648	1.51634e+06	557919	789709	364957	353038	330265	630457	296494	1.26136e+06	422541	153831	419099	96614.2	612361	123271
506.874	16.6774								1.15554e+06	1.17747e+06	622608	1.5069e+06	1.52748e+06	1.41543e+06	480481	378865	728502	359359	707263	703000	1.17836e+06	1.38604e+06	1.43099e+06	1.79202e+06	1.87848e+06	999439	155258	325497	519609	209820	228301	414617	847662	1.09039e+06	506390	238364	730060	721195	209414	386661	143142	336553	267830	461297
1153.02	13.3614								1.13729e+06	1.28356e+06	2.2783e+06	436947	1.10987e+06	2.21774e+06	842373	1.29646e+06	465295	341876	1.2688e+06	850994	4.42569e+06	4.84861e+06	2.78071e+06	3.8157e+06	4.37016e+06	848969	1.90439e+06	1.75923e+06	2.66167e+06	6.5637e+06	2.14474e+06	4.77504e+06	5.67454e+06	1.05194e+06	4.91677e+06	4.84032e+06	5.02241e+06	2.21063e+06	2.37696e+06	1.51466e+06	1.2801e+06	4.79161e+06	3.87197e+06	1.62074e+06
657.869	12.5864								1.0794e+06	527447	1.10488e+06	2.92425e+06	5.44382e+06	7.08843e+06	3.20196e+06	4.1608e+06	5.01004e+06	273888	1.27344e+06	622261	404698	484449	1.51548e+06	2.14314e+06	2.33021e+06	2.24003e+06	2.87099e+06	535091	822457	2.47895e+06	3.47221e+06	3.9691e+06	1.15409e+07	1.32483e+07	9.81829e+06	3.82272e+06	1.03674e+07	1.45532e+07	6.75282e+06	7.70711e+06	9.85596e+06	3.33638e+06	1.18692e+07	5.97212e+06
456.876	12.8127								1.02391e+06	473796	832706	1.4996e+06	860587	471598	103841	494868	110293	739804	137366	845699	435512	48380.8	208592	220613	148604	24861.5	490577	1.12304e+06	117243	63378.1	114077	71186.1	811875	507963	175781	719044	335379	850902	35824.7	262218	160925	319611	185531	604925
564.862	15.0663								1.02151e+06	1.38958e+06	1.79118e+06	1.28667e+06	1.17664e+06	1.40511e+06	2.68062e+06	1.41204e+06	1.69588e+06	1.03474e+06	2.05209e+06	1.53197e+06	1.75594e+06	789513	568535	796064	588191	961405	3.84127e+06	2.72664e+06	2.12784e+06	1.08616e+06	2.87176e+06	4.01304e+06	500510	1.07171e+06	503258	2.25332e+06	1.90856e+06	2.58835e+06	3.81818e+06	3.07187e+06	1.62043e+06	2.87376e+06	2.05177e+06	3.75817e+06
744.869	13.0455								1.00365e+06	861972	965188	2.28888e+06	692259	2.40889e+06	1.14226e+06	695093	854633	254597	451335	909499	548509	361547	707970	958352	442475	677310	1.07555e+06	571263	915698	896525	3.27102e+06	530377	1.42582e+06	2.15614e+06	2.33632e+06	1.8595e+06	1.34037e+06	1.58998e+06	646642	624600	1.34857e+06	1.10512e+06	1.05984e+06	1.07784e+06
598.81	14.3635								994426	1.76928e+06	820420	1.55844e+06	586735	1.12466e+06	1.17936e+06	758530	1.22375e+06	1.33278e+06	503661	910536	961745	1.08908e+06	578900	1.06022e+06	897645	1.11688e+06	900610	678903	924073	1.35018e+06	953038	1.18142e+06	1.03875e+06	1.62602e+06	846169	942365	2.20702e+06	1.15983e+06	620236	310522	1.53816e+06	766614	624942	1.12245e+06
482.853	21.7513								988772	894083	122594	1.19935e+06	1.39815e+06	1.59927e+06	1.03536e+06	1.32959e+06	1.03111e+06	895368	1.10427e+06	1.51996e+06	1.40409e+06	709076	1.4808e+06	1.36196e+06	1.8812e+06	1.82131e+06	1.50781e+06	784785	1.41099e+06	2.11259e+06	1.16835e+06	447154	1.42516e+06	1.36652e+06	442782	1.86988e+06	1.20459e+06	1.43993e+06	577585	547460	1.53023e+06	1.03876e+06	1.09332e+06	433189
670.82	15.5109								985734	765520	588058	531792	1.99824e+06	388831	230318	321711	68243.4	137852	449203	154174	55518.8	48933.3	28836.7	144864	216172	86498	169789	246679	233187	377330	530429	396184	166836	354271	330217	134050	0	365232	375938	150792	233508	213330	234792	163806
352.927	19.1865								940972	721775	348499	326968	601623	1.17822e+06	238370	235017	213524	457623	721843	625349	270323	153319	349632	156028	118367	36826.7	3.58535e+06	3.11834e+06	3.41465e+06	3.20141e+06	2.22913e+06	3.77067e+06	4.09014e+06	6.24599e+06	7.08116e+06	6.99257e+06	9.10818e+06	6.88611e+06	151587	222054	213381	169008	329077	156535
709.893	23.4502								918320	552221	180480	155224	123047	208626	131506	253548	27795	139574	357968	396439	2.49881e+06	1.35161e+06	1.50876e+06	1.87266e+06	1.23171e+06	808650	2.4272e+06	2.4113e+06	2.40209e+06	1.40902e+06	267341	560251	652474	554981	1.20847e+06	703592	709402	378530	169939	132239	163251	724969	917937	199153
675.821	14.3662								851891	929048	635387	582258	254915	637277	796391	676918	1.5994e+06	1.08164e+06	822278	1.09635e+06	557742	638664	366167	1.32116e+06	653734	1.02035e+06	717641	529640	430705	768942	1.21354e+06	964878	1.72861e+06	2.94299e+06	1.46773e+06	455513	1.04017e+06	3.07503e+06	2.12535e+06	971112	507691	1.19275e+06	1.02469e+06	1.41527e+06
482.937	15.7533								847015	747944	484358	1.64997e+06	1.15976e+06	1.21499e+06	81004.7	198547	82858.6	417684	332204	347739	4.13063e+06	3.85135e+06	5.14475e+06	559986	1.08342e+06	523392	2.53457e+06	5.72636e+06	3.96842e+06	1.50575e+07	8.1888e+06	5.12241e+06	1.9878e+06	3.59477e+06	3.24203e+06	3.37495e+06	1.51279e+06	1.27766e+06	292352	485984	346523	536890	802823	944243
457.842	16.1474								823849	508184	632808	355386	320806	288544	111945	129631	0	227913	67663.1	51207.4	0	112713	108733	52081.8	46967.6	0	180685	74491.4	266655	110966	98372.9	131342	18431.1	203518	129694	135424	151500	0	93310.5	26069.2	156095	63291.5	114203	183862
640.706	14.3048								811429	301654	698604	316653	1.01628e+06	205251	442520	369166	273378	383666	30897.6	233958	380033	366882	431444	211847	131847	826447	154763	308889	205067	1.50869e+06	259704	268020	1.22409e+06	1.00353e+06	1.32768e+06	468476	282559	642988	629217	365565	269904	54999.5	250004	340774
704.811	12.9999								808459	631377	742467	1.21026e+06	657534	757640	714455	340076	952090	727048	826587	1.2613e+06	449446	1.44599e+06	345000	707304	210700	330812	624153	3.34912e+06	1.0038e+06	1.02201e+06	601441	1.03088e+06	1.03934e+06	1.98244e+06	1.87588e+06	2.00303e+06	1.58569e+06	562680	383920	2.4777e+06	294007	334538	662885	1.6886e+06
730.875	13.061								806984	1.47951e+06	202229	515991	210685	381049	386191	461849	115394	948862	44382.3	239074	147972	508608	354423	344827	142569	133347	1.38072e+06	1.14469e+06	1.40642e+06	525999	304349	2.84893e+06	1.22083e+06	1.69103e+06	3.62846e+06	318035	2.18473e+06	303127	265076	76995.5	320140	324906	589899	978212
438.877	14.4744								797850	531708	779046	683337	581182	1.00943e+06	349512	596277	277243	301010	285864	1.05185e+06	106952	199603	106678	482416	125374	113315	221694	323332	681008	234858	500099	276460	289448	348420	582802	521327	238401	364574	231666	170976	308732	247494	175505	478750
384.866	17.4027								782459	279126	1.04683e+06	1.59427e+06	1.25817e+06	2.82015e+06	1.37212e+06	1.04505e+06	1.12688e+06	918799	481060	1.49791e+06	7.48442e+06	7.63701e+06	1.30713e+06	7.46407e+06	6.12841e+06	5.43622e+06	1.19937e+06	566647	1.81141e+06	742476	694591	1.63706e+06	2.61604e+06	1.10861e+06	2.15908e+06	3.13485e+06	4.72106e+06	2.78075e+06	478684	1.13005e+06	1.4022e+06	982022	342623	1.59395e+06
474.894	17.5105								781929	261570	212865	986313	846302	717185	987933	972516	1.06522e+06	680609	1.42613e+06	901135	468883	699526	256751	564950	433976	714156	302446	334174	447080	818450	377564	425862	1.56271e+06	962738	862453	1.69922e+06	752059	406824	232088	350465	449603	535840	260997	321704
667.74	15.7167								765749	797201	383991	545006	1.2787e+06	1.02855e+06	969034	1.30541e+06	348604	434755	361967	351411	276552	25255.4	99376.3	411176	379208	474244	467743	1.16715e+06	265094	835225	918698	289568	1.73783e+06	900765	508552	1.17024e+06	1.66725e+06	923766	118439	303424	589735	264200	338270	809793
630.789	15.4279								749885	269097	210621	432497	272377	608326	608864	702789	557295	646236	257117	849122	467507	783456	648123	687407	368203	872232	845502	775686	417545	358666	784187	339732	3.4093e+06	1.30922e+06	404057	646378	548862	1.42525e+06	642130	854235	498173	1.63968e+06	385911	1.39252e+06
620.788	4.73242								746003	1.97704e+06	943126	608257	719434	1.28863e+06	221612	434948	398238	161311	148338	277473	193148	251035	131030	37498	230592	192835	250561	742508	243538	423244	362974	566920	1.67322e+06	2.5954e+06	598953	932489	2.0563e+06	1.92098e+06	223390	46994.3	134879	398995	184271	406421
566.981	16.5856								739459	2.09145e+06	1.81611e+06	3.23131e+06	2.93716e+06	3.549e+06	1.50451e+06	408371	585931	917586	1.62073e+06	716875	342977	556707	660096	695208	622131	610966	566879	581399	266171	643500	561144	487565	306793	306698	439577	208321	241706	187293	1.82833e+06	265747	516650	2.2602e+06	1.21532e+06	1.09181e+06
364.79	15.5034								721052	924529	578817	163479	347834	732160	450195	487204	454568	198941	127084	451739	873245	249241	532129	1.06756e+06	522960	539386	300156	191094	684848	597755	316644	534399	723944	339845	612533	376236	761839	917814	413892	961803	175152	714501	605035	486889
430.95	14.1932								715177	92464.9	1.04164e+06	473984	403252	802014	453992	351074	245811	1.09119e+06	175349	869589	139682	250260	253633	468057	415897	532976	865524	1.08039e+06	2.07336e+06	1.10124e+06	1.087e+06	796951	462380	331983	334767	132451	197605	339489	395509	262145	481034	1.01073e+06	1.14725e+06	1.21276e+06
869.046	14.8509								696896	743438	379010	504566	287138	1.08988e+06	695464	497130	499956	515227	388087	468389	419968	379148	334073	373207	189945	59397.6	1.06336e+06	1.18509e+06	1.28385e+06	2.43331e+06	1.35586e+06	1.96773e+06	220110	103275	470647	695297	626575	601561	533400	347498	649356	350266	455098	306477
416.851	4.88077								681929	409801	1.32956e+06	787676	770420	1.71727e+06	567180	222165	420289	171810	239231	332713	406870	364858	386013	386773	430950	335396	1.68172e+06	494286	2.34999e+06	482786	1.57612e+06	442981	490835	663954	462517	757557	1.001e+06	1.02912e+06	1.15328e+06	782060	763564	615085	607655	707129
486.74	13.3051								678357	458829	770580	409254	836181	780542	254810	371122	600962	484868	268613	210775	533875	1.15551e+06	794091	296893	468410	403186	417604	472820	540499	206554	1.10613e+06	1.46889e+06	842510	745895	1.77389e+06	1.83788e+06	1.0484e+06	2.27314e+06	396432	446170	252911	611871	612670	763694
738.918	23.1946								667457	793989	244945	42337.5	84725.8	85811.3	72151.2	90686.1	124736	530364	274734	502204	1.14174e+06	1.22092e+06	1.0912e+06	1.40172e+06	903263	1.17158e+06	1.36173e+06	1.16187e+06	1.62977e+06	1.25233e+06	264369	273431	83681.5	210805	114928	2.00935e+06	297288	123119	116823	74511	86060.5	1.16403e+06	109642	95855.9
444.919	20.2743								667356	906430	681892	543663	724349	603174	682927	348115	363242	322178	567803	241075	103139	87867.4	347864	172469	399110	262566	170561	288067	306363	940247	243984	992805	350833	454427	735318	174423	219407	342284	569468	608141	412740	343756	408213	494686
666.707	15.7088								663249	1.62498e+06	2.42046e+06	2.79587e+06	3.45463e+06	3.91523e+06	1.91383e+06	3.37506e+06	3.13686e+06	1.90159e+06	1.59818e+06	741346	844293	1.67546e+06	384141	595865	1.06059e+06	672049	1.01098e+06	861272	1.13175e+06	434329	923553	1.48402e+06	2.49233e+06	4.42003e+06	1.61491e+06	1.83676e+06	5.14849e+06	2.51182e+06	518317	2.20979e+06	630884	708327	820797	976150
498.862	23.1589								657078	978811	1.41031e+06	530903	618571	608776	1.83854e+06	1.42451e+06	1.58037e+06	2.01259e+06	2.43631e+06	2.50098e+06	411371	883165	484543	717358	865508	533662	736609	970963	354708	707637	698361	1.04177e+06	1.66623e+06	1.16154e+06	2.16575e+06	1.31508e+06	990069	1.4432e+06	1.38633e+06	834371	1.83445e+06	1.0747e+06	658288	652225
488.693	13.2234								650707	914463	405896	780433	697079	524322	611171	2.08931e+06	878635	782581	1.43214e+06	1.28147e+06	1.32472e+06	805194	1.4112e+06	428410	664194	1.03699e+06	792654	1.54565e+06	2.31674e+06	1.31413e+06	672937	1.38661e+06	820833	593001	497677	1.32279e+06	969151	1.01593e+06	1.51926e+06	731446	865589	765394	1.23844e+06	630547
548.84	13.0923								650547	309134	698311	372642	604951	811157	1.26041e+06	30640.4	600064	102309	208937	352184	458114	249041	288535	230179	343307	282432	216039	127136	167688	560237	682975	205555	211013	881047	1.13174e+06	0	910485	442689	249995	135675	172692	125524	199282	206443
376.835	5.79176								645488	846484	923243	970468	1.3832e+06	1.3687e+06	1.27714e+06	594729	848711	110961	300259	317443	333328	838839	807442	278441	394309	221525	1.06574e+06	379614	1.12684e+06	662252	456872	808051	653989	642540	580691	2.17945e+06	1.37681e+06	1.23092e+06	569477	789654	555888	435013	790768	600796
485.958	18.6906								614702	190295	118241	132230	773358	806726	64082.2	75945.4	86896.5	311566	311656	181514	185864	532300	113941	99486.5	77662	223196	479258	168134	300521	590700	463131	683037	2.46935e+06	3.08771e+06	2.77415e+06	1.45735e+06	2.38041e+06	954713	25377	69047.6	45567	88919.2	151953	85510
430.934	19.151								611044	215066	323578	373843	258556	150847	46692.8	140093	190956	120447	134150	118390	55873.1	114954	67567.8	74091.8	103421	119134	233191	118246	218814	406794	372210	319609	1.56733e+06	695662	1.26694e+06	391339	187797	373639	137028	340509	389126	258396	494610	477359
616.733	15.4677								610538	598038	294956	350652	183451	772367	967486	525540	554188	1.06745e+06	613143	797161	527091	409356	572166	767440	245613	840995	375007	714119	711511	251401	393173	408552	539166	374233	581201	1.47084e+06	913166	169877	483032	227298	373428	607800	995683	824678
486.87	21.5725								599102	336869	565344	989384	1.48753e+06	2.49049e+06	2.31054e+06	6.18422e+06	2.8474e+06	722607	629515	477185	563476	357027	291780	324760	506138	153842	422483	1.08281e+06	181286	611318	501759	279489	1.21712e+06	2.55468e+06	631959	1.18062e+06	1.47481e+06	1.02055e+06	296376	333104	142358	767885	527552	1.4159e+06
518.845	13.7271								596070	453282	451631	327452	414064	575166	360968	218664	178177	291794	169967	304761	166980	101497	183284	101609	202835	468276	646737	568131	1.32361e+06	242980	741895	178464	158649	520977	602579	267617	26800.7	111222	400211	306333	394210	331082	280692	314992
448.927	19.6875								588585	357308	568437	311406	385003	781826	506681	167807	423800	134917	604795	208455	311496	147651	166374	145582	125680	224660	231013	369327	695074	277800	878880	647153	709737	1.46882e+06	826896	582885	1.17574e+06	1.06508e+06	640804	216751	518298	1.02538e+06	694160	584573
420.824	13.1858								586110	1.53679e+06	749322	422933	582104	776262	1.15984e+06	365159	391382	550187	577430	1.93597e+06	654357	603512	204641	974675	332630	492192	584250	3.06786e+06	989279	449478	751867	1.25716e+06	1.39915e+06	247448	536399	545926	814406	462587	495454	502225	1.13203e+06	850858	792345	672962
415.771	13.1448								579844	568982	986428	754078	1.58357e+06	2.59245e+06	447160	1.08782e+06	265551	1.05698e+06	1.20469e+06	1.11647e+06	619815	844491	442753	324726	1.35231e+06	716624	1.42873e+06	1.5309e+06	982731	686828	2.50261e+06	516795	539207	924705	541807	990362	606278	532892	1.88719e+06	927515	1.09337e+06	1.22817e+06	384787	484665
603.791	21.7559								566551	765351	1.88264e+06	1.41908e+06	1.20425e+06	777653	408803	1.16838e+06	1.29694e+06	786463	1.77037e+06	993782	1.48743e+06	1.0202e+06	2.19758e+06	1.73583e+06	2.0543e+06	1.35307e+06	3.26233e+06	1.80436e+06	1.1838e+06	3.84654e+06	1.32269e+06	2.13537e+06	1.42514e+06	1.80754e+06	2.11175e+06	1.24735e+06	1.35304e+06	628559	498923	301626	431027	620075	762338	1.00139e+06
676.791	14.3507								564140	1.03033e+06	626227	603462	260143	761319	180075	851508	1.00774e+06	483611	1.06322e+06	458930	487209	436248	1.17903e+06	238375	1.48392e+06	326647	457705	468887	376776	750433	1.22635e+06	338002	721364	739062	843929	677020	470589	586552	257894	796593	1.00849e+06	442091	558295	498342
930.915	14.3754								557814	437708	641006	768454	515225	694985	546565	403087	698265	521930	252194	253876	355759	882320	224150	336122	513352	398210	626245	558969	1.19936e+06	1.6745e+06	2.05398e+06	1.14352e+06	2.86595e+06	1.63249e+06	4.14268e+06	2.78243e+06	939187	2.0748e+06	590236	411635	628824	521045	784769	540670
915.978	14.457								550085	138378	460127	73968.5	621093	492972	360973	906163	368502	377627	677508	654295	418705	0	255913	21791.9	237628	521287	368218	325832	390807	726488	679346	428277	1.26061e+06	1.59663e+06	2.63945e+06	1.25214e+06	3.7529e+06	1.37066e+06	876089	984381	177965	1.52163e+06	1.56775e+06	621985
1441.07	17.5712								546549	447146	1.07925e+06	171353	477205	588365	400107	310096	344133	347936	346694	512863	1.45516e+06	806289	863474	733894	872480	1.36437e+06	375976	199946	454212	1.16722e+06	631237	547602	5.28626e+06	1.64961e+06	1.49091e+06	3.10289e+06	785201	1.8246e+06	326567	293815	347066	703341	222718	816964
456.936	11.7452								544332	542054	615663	1.4996e+06	977201	660534	409991	688740	295207	899772	568156	1.10363e+06	692063	360231	877946	801434	513095	650120	3.57884e+06	2.29664e+06	1.09041e+06	6.03835e+06	4.3478e+06	9.06596e+06	1.6341e+06	2.1426e+06	775685	957411	985885	1.05165e+06	776165	658378	716937	1.72962e+06	955617	935798
756.908	16.9243								538824	277501	412472	392974	262120	142648	155297	353477	400081	385900	475431	119180	233882	296684	175753	332072	282665	422194	411214	1.15557e+06	848632	1.37842e+06	1.11294e+06	1.21991e+06	222210	774240	147367	909630	453084	399428	99203.9	68007	81995	259964	331107	291639
454.868	13.3843								534730	738836	1.21477e+06	592369	222929	351530	326311	32377.7	62780.2	112392	353564	148075	134836	0	588660	385406	186371	550984	2.05485e+06	120352	817993	528125	212657	210996	292220	433488	377376	243712	273966	1.93657e+06	64233.8	449935	148339	231167	100714	229350
564.842	13.4909								531368	316616	775645	620153	741172	268009	431098	383799	720497	858240	1.14676e+06	715661	627672	181307	674567	923784	1.15031e+06	237909	231096	348980	529110	453674	1.02274e+06	563211	348602	559990	491915	470024	603172	700829	466846	869790	934210	1.61771e+06	1.12042e+06	1.29285e+06
490.888	19.5477								530613	2.65372e+06	2.52204e+06	2.93905e+06	4.15892e+06	2.69976e+06	3.28592e+06	3.21203e+06	3.49794e+06	2.93524e+06	3.98983e+06	3.04701e+06	390303	745777	302290	609225	389970	323608	1.012e+06	739640	1.07356e+06	813330	1.49938e+06	1.21013e+06	1.64692e+06	2.21274e+06	1.69973e+06	1.83925e+06	2.06476e+06	2.16353e+06	2.51812e+06	2.17276e+06	2.26444e+06	1.99552e+06	2.84615e+06	2.49563e+06
193.756	30.6535								528222	94180	311730	784173	371122	492834	522873	333136	404732	591306	302856	367637	538098	339130	519197	296220	137865	231355	357875	296685	450639	1.08668e+06	228919	608754	258739	78325.1	339065	196625	142809	389875	665710	319345	269587	340734	206003	514696
483.727	21.7694								527442	930759	528204	466213	270939	772441	363570	726945	536600	507919	339767	350013	603680	673392	708269	755703	341460	352433	993397	605335	652123	350656	531931	1.07597e+06	1.6106e+06	1.53107e+06	436363	1.1818e+06	1.43175e+06	161063	186132	682055	110330	1.00895e+06	670601	614781
629.886	21.758								526839	1.04631e+06	564661	1.32819e+06	455555	946670	2.4174e+06	691249	970486	3.65619e+06	2.02568e+06	1.85402e+06	725599	1.64348e+06	1.03167e+06	2.06238e+06	1.95441e+06	572911	2.07119e+06	2.38834e+06	1.83033e+06	1.79097e+06	1.06316e+06	1.0977e+06	3.92711e+06	3.69103e+06	5.24693e+06	2.01644e+06	5.30478e+06	1.71997e+06	952747	3.57672e+06	1.46218e+06	1.34336e+06	1.17283e+06	1.56914e+06
378.835	5.21428								524418	0	1.05253e+06	606740	1.30294e+06	1.73865e+06	1.21955e+06	487001	1.33271e+06	321368	508334	1.26076e+06	290767	602386	520962	298671	355720	342813	1.39128e+06	2.18638e+06	1.29716e+06	383776	552666	781822	1.12023e+06	866514	746747	325124	602804	993301	234886	1.24273e+06	353565	1.51274e+06	541207	1.02494e+06
489.042	29.8909								511117	1.34841e+06	568182	880487	1.91492e+06	739037	731923	624404	561130	363236	342206	565936	163535	500562	1.14121e+06	386547	104531	127639	145031	308911	342766	205843	218778	112883	994541	2.0008e+06	1.75667e+06	2.14259e+06	324454	746651	1.34452e+06	189842	801692	615141	686073	533005
631.783	15.5069								510126	480660	923524	228997	701458	615039	1.10154e+06	984605	471681	1.6433e+06	458605	542448	1.19096e+06	426753	279574	536995	1.244e+06	1.02913e+06	335812	1.25998e+06	811332	700470	856041	489407	632888	458801	1.05159e+06	1.64321e+06	279482	589853	2.39548e+06	1.32558e+06	1.50648e+06	1.07654e+06	760315	177247
509.849	21.7272								496969	2.02323e+06	474216	1.22495e+06	1.34196e+06	1.32693e+06	1.58089e+06	3.23778e+06	1.4468e+06	3.04277e+06	3.29638e+06	3.45177e+06	821861	702684	1.22446e+06	1.0518e+06	539180	959610	1.54075e+06	1.29083e+06	699943	1.4629e+06	2.02552e+06	2.53041e+06	1.94646e+06	3.05636e+06	3.40377e+06	2.66387e+06	1.68619e+06	1.16686e+06	1.64079e+06	1.67634e+06	1.63353e+06	1.90736e+06	822871	1.08466e+06
214.703	4.84273								488334	272443	417697	169830	399268	285748	166590	311359	428261	250271	145325	110122	217255	296485	652283	201584	164828	308540	1.16836e+06	616488	709799	389956	337737	695370	64687.4	352767	153327	48669	131737	112104	203318	191567	55466.6	199163	752592	148802
564.971	17.0559								480746	359532	783398	2.21209e+06	1.07943e+06	1.53235e+06	774409	395700	405754	530243	562794	287207	402203	2.51209e+06	2.74246e+06	1.90025e+06	2.8376e+06	3.03358e+06	1.69276e+06	836667	791506	5.20357e+06	3.20992e+06	3.56831e+06	887975	877177	284960	1.47119e+06	454074	875606	680737	241270	605125	1.60286e+06	1.38367e+06	1.3677e+06
672.837	15.6164								478910	313173	212492	179583	262380	102448	257627	463342	136892	135913	253171	199560	285193	227173	147911	289268	147647	225341	92679.5	310834	152577	263383	250016	500153	1.05126e+06	2.27577e+06	637613	819573	1.29364e+06	524327	274548	138853	254063	204866	131005	209523
690.643	14.4571								473778	347057	535185	644924	486413	338688	289863	866918	160350	157854	307728	1.30188e+06	181900	342158	93282.6	136441	854614	177217	580140	519298	393230	648533	276573	826465	2.72581e+06	4.97051e+06	1.62415e+06	3.4165e+06	2.92689e+06	1.33993e+06	603539	600700	787571	871134	331252	1.13324e+06
1114.97	13.0383								451726	378702	416581	654708	499975	0	437059	209507	879497	290134	159351	728778	158001	230613	0	319874	92376	206858	0	643135	574322	1.62856e+06	0	1.49934e+06	1.08994e+06	389338	413804	1.28974e+06	140706	1.30623e+06	266951	211321	68069.5	100076	260901	469560
712.827	15.6929								444216	371742	60744.8	200075	129870	74840.7	531552	755337	127096	128453	291557	132937	86414.9	329877	54588.2	135407	171351	249576	139076	260238	211427	352383	177624	220604	2.21336e+06	3.12084e+06	605265	2.71459e+06	1.99883e+06	1.35252e+06	369913	609432	724292	367317	266105	235255
504.869	21.1562								440696	699667	465535	177401	301903	295119	266396	157837	222231	351214	119000	646819	252437	204860	139230	427096	518885	438189	405770	192833	225973	231910	142004	706629	654005	321840	392615	179160	257866	368121	707522	1.23844e+06	1.69501e+06	1.24161e+06	1.9242e+06	1.55882e+06
565.799	15.1031								420721	327853	450352	735888	617730	691299	570965	762472	278010	208670	366583	396146	488044	355677	434937	622866	293717	723474	376734	496933	357683	1.03468e+06	1.03633e+06	464719	388241	707353	545800	597113	598056	375204	178051	807277	1.07814e+06	753650	693347	408135
562.918	23.4208								414362	435377	157184	475559	136984	230810	1.24607e+06	1.32955e+06	1.18621e+06	1.36021e+06	1.07531e+06	1.79658e+06	140837	448851	114554	324682	102605	300369	649721	404691	307590	551254	189332	680377	383211	118330	169601	428665	509747	266891	366562	148728	309326	260237	217238	198593
600.76	15.4065								411329	542258	184679	194816	362958	323984	256971	433905	515036	80198.1	215902	575121	148970	213037	580870	601962	211378	629948	174602	270258	951994	524475	217222	389340	219511	235293	267476	319685	869820	176117	876808	169485	156747	121407	137908	411612
466.785	15.7711								411101	203061	190325	199724	255732	171204	233070	229996	250535	266889	311212	282371	234085	204361	226206	390064	107096	152443	201218	82066.7	244811	483810	272696	304435	914432	226892	731603	585239	166710	179538	396598	461043	380583	540589	367576	78532.4
1207.13	14.3904								397357	172316	277781	0	112934	0	173333	553253	121992	255660	740321	182135	55866.7	170404	134826	642159	260759	167766	223277	92084.7	116195	240724	260759	0	766225	257733	189591	101252	233595	31450.6	171378	80657.5	166774	39946.2	45671.5	100370
806.89	15.4169								387324	689957	251829	171464	139268	178989	153341	497970	292458	971398	2.1847e+06	1.22693e+06	743197	150330	150652	170208	501849	532977	691670	341802	790044	944455	514032	723211	586585	901638	642549	1.90853e+06	892330	961118	815367	674930	781508	1.73918e+06	2.03423e+06	1.01149e+06
729.909	13.0966								375202	408041	432574	744655	422053	245530	815980	227088	660205	783759	189641	525123	1.61288e+06	607940	146800	264041	335631	312798	1.21911e+06	578562	233366	556407	1.58458e+06	773373	585525	322608	1.60576e+06	2.57795e+06	572266	837198	321663	769134	175742	494650	386469	869354
705.083	14.9067								374614	830751	540202	398591	594850	375879	472678	584663	265394	198588	213772	206039	100323	873429	79405	144467	92644.6	74143.6	1.26736e+06	213749	727308	381982	557515	1.721e+06	362256	1.30033e+06	979169	1.06564e+06	930664	544615	192859	152236	440051	1.13122e+06	323499	573952
655.079	28.8214								371512	246754	325712	726634	244611	1.05932e+06	771871	1.2824e+06	496968	2.95331e+06	3.51835e+06	4.01132e+06	794329	991662	2.81415e+06	1.61927e+06	3.62113e+06	1.00057e+06	997800	367117	883637	4.60579e+06	1.56385e+06	1.82274e+06	88160.5	128532	193390	353952	226705	135155	517751	133038	384333	216525	160820	141573
962.903	16.4818								368976	187123	193932	329763	435468	342006	587215	844055	918125	355747	751463	516868	318062	258844	417055	619354	611942	624793	1.17217e+06	533993	885750	807752	937712	1.69694e+06	669745	110063	552807	226230	679297	658036	479248	513492	384424	1.10151e+06	276788	837122
488.845	21.3648								359017	278895	331263	123651	416135	729943	677057	933129	929359	146898	215565	216110	487941	392929	603565	483614	335236	119233	993846	1.22388e+06	1.05313e+06	903075	1.66654e+06	1.01485e+06	328513	697374	1.57239e+06	486676	591870	1.07128e+06	248059	285883	637040	250667	327575	311000
592.92	14.9651								353602	751851	339470	491299	393462	828165	417800	186734	694502	89683.5	325455	284895	288196	431616	167836	272026	375186	364810	1.65535e+06	728599	628235	1.02057e+06	657068	1.87862e+06	344458	306496	772292	324487	467569	944376	477363	307720	1.0734e+06	1.01741e+06	398711	507380
418.853	15.0856								353154	395816	665277	697933	419031	653499	618416	514856	204702	266956	388107	128363	429253	244125	474275	153177	1.05053e+06	562855	631511	689532	788546	153705	405461	585747	160953	356888	192757	833245	73296.3	144518	296849	699001	561698	191952	427134	162476
448.82	15.1304								344907	569212	552717	172887	198589	280723	484956	339363	120654	137556	202411	166624	1.06676e+06	493988	724675	275276	1.64601e+06	168927	1.71188e+06	561557	264975	774993	527630	498895	407508	509597	577131	718643	824027	232533	425206	257598	286993	325796	460153	519917
691.724	15.6418								334712	204499	374937	198248	183201	97310.8	127553	269281	286917	74362.3	91659.2	76937.1	130013	70079.4	174132	0	22342	16201.2	305148	187808	327266	389325	884427	322183	1.54856e+06	1.46409e+06	2.32742e+06	557869	880641	1.38054e+06	112201	65695.2	255587	197184	153177	238043
536.933	20.5793								332394	495099	410647	354129	601547	365071	203364	326869	363539	400391	280674	450511	478550	280880	466475	164852	219729	285575	1.51083e+06	845849	1.05304e+06	1.52554e+06	1.71361e+06	1.16076e+06	618723	253811	555012	886009	590015	1.08472e+06	85566.2	206131	216744	989057	644644	858409
582.991	13.7888								314380	296407	313466	554387	598793	703123	1.69925e+06	929262	311794	227039	216277	457702	163377	668450	240507	296579	256945	118769	135406	487421	273805	739339	1.21216e+06	608456	211532	764310	887778	114004	363550	258240	620741	96316.2	469869	265142	748268	240671
560.843	21.1979								307530	379456	369277	295056	96098.5	271768	838192	1.15512e+06	318834	1.17389e+06	2.24518e+06	1.2071e+06	701918	490637	1.01339e+06	324555	1.70082e+06	627612	336063	391545	171162	675647	626351	443760	558113	211039	348908	347752	295480	258563	1.57489e+06	528458	224255	359775	482713	420138
592.964	13.7734								303820	583450	465453	491299	776034	793664	224018	635307	490790	271800	674234	192787	838039	1.52846e+06	804498	2.63833e+06	1.65345e+06	1.89368e+06	1.53573e+06	1.05269e+06	870096	2.93138e+06	3.27673e+06	3.85733e+06	644557	594487	279730	1.27688e+06	467569	1.29132e+06	345853	725616	606539	1.43295e+06	777163	507380
696.887	15.784								297743	618110	227083	385700	398330	416514	592145	392025	250721	362349	326298	139450	157237	145386	60537.3	23285.5	299379	130946	446904	491367	268430	643558	721679	113924	4.41069e+06	5.33952e+06	3.35086e+06	5.39062e+06	3.19589e+06	5.91641e+06	1.00157e+06	842128	103034	1.3021e+06	899082	444656
532.828	4.77581								291454	582682	902951	613188	1.3422e+06	364187	1.5101e+06	1.00625e+06	509263	290617	290677	1.06404e+06	573570	754432	417714	254848	1.15883e+06	854341	408754	966114	1.24058e+06	1.2277e+06	4.95247e+06	4.03157e+06	2.603e+06	2.15495e+06	1.14538e+06	2.5699e+06	333379	2.84308e+06	1.5534e+06	2.1588e+06	2.07842e+06	3.11128e+06	2.14034e+06	2.97758e+06
562.965	16.6959								283727	158674	405783	187064	1.06181e+06	1.3028e+06	638383	901261	655215	1.13053e+06	1.4008e+06	1.79467e+06	569082	312624	254702	211236	301877	479575	793578	995763	840274	2.84248e+06	1.88035e+06	2.66979e+06	386848	361980	443988	480337	915817	818233	853413	325906	295932	671306	477458	558155
377.847	4.62203								279193	396134	1.72185e+06	875052	1.04807e+06	215141	857008	955586	569513	203985	287103	373115	510816	1.48935e+06	1.31898e+06	349640	360305	608046	1.25288e+06	548394	1.49806e+06	1.5096e+06	734467	485774	658310	284434	589603	490109	971284	338874	736877	424447	218647	677162	617651	935093
760.893	13.1586								277206	312304	104958	203009	125935	413392	274897	265240	217039	1.58222e+06	423650	649378	232218	32155.9	252481	260066	82375	162499	351273	238378	73316.9	264663	254982	495700	919645	3.10525e+06	533504	63032.1	212529	756190	1.37106e+06	242711	394730	585018	257555	454388
593.824	14.5405								273581	466953	154041	1.52067e+06	713991	755708	2.41118e+06	1.17959e+06	1.35749e+06	57213	385893	954313	550912	337972	168135	1.46137e+06	874594	1.49034e+06	412781	172914	189070	735970	1.08549e+06	1.08653e+06	1.35208e+06	307916	773770	324975	1.17878e+06	1.22198e+06	1.4778e+06	2.39801e+06	3.57253e+06	434793	2.33225e+06	2.50817e+06
362.869	15.5484								271765	887149	121222	818495	429666	620472	246653	133425	206343	167385	372438	162950	294883	391252	322280	206113	191036	212363	1.16732e+06	860298	595117	191245	905713	99782.6	229582	563454	366301	313796	387845	372130	277265	114451	220902	157652	389118	85498.8
682.73	13.0105								268365	539848	1.12384e+06	160896	210852	834336	488935	509211	564765	300797	475663	903567	1.04008e+06	395914	582045	432825	549459	682122	841146	293313	174479	254443	525660	369663	1.33578e+06	1.31315e+06	558095	269887	538012	357052	498097	322355	227074	361111	542337	406785
530.799	20.0439								266714	229113	197873	198088	204180	439344	612119	281718	136176	183149	282594	113882	130428	208450	746594	595836	615537	173004	260811	182625	330266	471649	250343	288391	446102	1.1743e+06	135448	277940	477956	356262	614705	441985	466823	556587	233832	530934
687.07	27.7494								260632	113398	305566	2.88258e+06	4.24966e+06	1.53947e+06	6.85307e+06	7.22664e+06	6.26125e+06	1.0395e+06	1.58734e+06	3.45309e+06	459698	788092	161042	358272	214807	1.25577e+06	344631	260506	255379	1.68862e+06	6.51874e+06	6.00338e+06	888887	1.22846e+06	1.81017e+06	233466	837538	2.21709e+06	2.11383e+06	1.7032e+06	1.77597e+06	253122	254294	655919
526.774	4.71058								259370	340917	167559	505880	383673	1.09384e+06	936928	605551	1.18845e+06	274556	840691	1.11989e+06	556183	1.32266e+06	404464	548799	583082	1.2094e+06	646221	1.49416e+06	1.64389e+06	2.10289e+06	1.47176e+06	2.688e+06	533448	770504	599153	858023	1.10617e+06	1.02326e+06	326570	1.15254e+06	559189	628396	414504	987290
474.731	14.3279								249290	358316	119881	198328	153197	166828	483177	606048	1.10705e+06	809429	358728	339083	143312	211557	471651	151194	101670	190911	159082	361922	170006	190575	229627	379932	404536	203069	745118	472634	327866	605167	137503	190237	160781	543919	281565	347165
726.847	15.4831								248964	316326	287236	234067	250300	565834	191025	279342	265853	141489	196606	306444	988972	1.43863e+06	1.83102e+06	160677	93965.3	726858	2.21153e+06	630524	871208	1.71237e+06	2.87551e+06	3.72545e+06	2.2157e+06	1.36555e+06	1.24721e+06	1.30151e+06	815918	957695	196749	268210	195979	199975	103243	435173
708.871	21.3134								248648	217564	169398	72345.7	281224	248617	81849.9	92107.6	197588	98984.2	302138	165517	1.57163e+06	1.17596e+06	1.4568e+06	868657	595514	769135	1.5998e+06	1.24109e+06	671606	1.09312e+06	213969	747415	114562	185656	275620	971163	107342	154241	356814	182862	67488.9	1.1454e+06	197827	219702
386.867	17.2176								247144	398859	377165	386675	376287	618662	441556	379594	310144	505831	414787	514513	370590	269407	284747	183153	344680	457825	429771	398156	418541	687694	603247	329949	832209	306931	210177	708478	402329	1.10559e+06	339832	530784	300313	182281	250756	261571
384.84	15.5311								244668	229665	223539	469122	911725	468295	702717	525818	437956	618825	373389	890165	636005	1.46985e+06	325469	637600	788190	766734	581529	574287	488541	792224	259713	356202	646171	116939	262830	262784	123879	502322	346469	206348	930664	814034	592240	659566
338.761	6.05499								241054	346197	435194	476077	313736	617382	440211	529895	979321	271009	371265	755335	468462	1.03281e+06	1.3377e+06	608490	426135	629162	483781	1.801e+06	1.13184e+06	606482	1.23302e+06	409380	1.20002e+06	1.00548e+06	381026	1.01602e+06	319532	330036	599762	973053	558086	565955	474822	799630
473.858	4.66397								239731	957330	264994	1.07597e+06	233578	178634	420812	242773	210082	279059	110583	322365	123816	135966	133816	109148	149188	126031	424950	74957.6	129882	226747	85658.7	138495	32349.1	220526	36719	237973	239771	295312	0	540091	202769	662552	934759	1.20471e+06
546.966	13.7329								229097	1.39784e+06	506858	185128	704311	429380	170687	362500	166150	474427	404965	210301	613564	467280	209522	817612	674137	656469	328230	876029	1.09305e+06	1.23384e+06	1.38378e+06	1.52455e+06	220454	396794	496098	238664	521085	48440	555765	244405	1.22573e+06	557813	567162	879051
527.771	4.76854								224507	605342	242582	453012	555895	663648	679865	447958	465430	1.2561e+06	456438	461409	169791	211703	222103	403816	255437	264669	221567	570371	229295	333637	802865	687887	757323	951473	608388	625393	725975	1.19824e+06	783394	1.17773e+06	1.4573e+06	273078	388530	806000
760.096	13.0666								223619	290409	617544	247030	122507	413392	215618	149352	588689	1.45969e+06	523772	979863	177065	209787	62321.6	476243	261814	182677	351273	149199	296034	221571	140286	225404	336845	494196	135945	518386	578579	2.2299e+06	296403	314865	548342	192163	120385	767452
388.931	18.1286								223417	377612	300782	429124	250346	191596	95449	175648	343576	306962	383743	524554	349751	590664	963009	468981	177916	194117	2.1102e+06	2.36752e+06	1.37688e+06	1.63156e+06	2.05362e+06	1.85714e+06	830122	378435	377858	513219	404121	975944	158595	218203	121415	174512	88375.5	380210
524.872	23.0633								218055	242703	162160	260394	418976	408847	313652	886140	2.17799e+06	185043	605449	264835	839397	481225	225918	176170	298343	188625	198977	116364	250914	272545	465177	264942	2.85161e+06	3.38332e+06	2.52786e+06	553214	374967	206401	122221	374669	162362	193263	227352	166209
451.855	21.4738								217952	157891	261731	363411	496645	311961	1.0063e+06	1.80433e+06	1.3025e+06	223764	628519	184667	107450	300644	120364	65441.2	343417	202894	543782	491536	158602	424893	632848	508320	249781	619449	340085	382344	500382	483422	58740.3	239790	178409	100312	87538.7	99146.3
468.805	13.6685								214959	114954	448953	299198	509638	450718	515840	249473	417505	76475.8	520567	151886	561779	409388	499494	182818	370228	212636	303226	667577	550160	979169	1.25594e+06	528271	545464	0	0	413419	239495	541388	347885	233442	298626	162366	75871.8	436420
404.817	15.7773								214115	176838	97557.1	255948	336151	191547	294521	589250	317456	392588	189636	327202	133683	176951	459580	328333	167795	177252	621399	364590	583907	852875	340020	167869	192912	751896	1.73692e+06	248192	455278	526299	753893	177810	188050	248046	248763	686830
374.801	15.1205								209632	240278	226690	416883	189456	110350	482889	305201	869243	231330	337636	341897	135736	137066	329475	302823	203281	332331	446257	558347	458750	1.00464e+06	192199	136899	414762	685646	340032	495996	300352	415432	247185	245856	174095	388704	283845	235988
456.898	14.1476								208576	283152	215362	1.46362e+06	493341	172153	133973	132907	152802	252152	137366	673361	535031	330487	314278	239860	658502	329699	630996	525166	214222	305340	828473	210747	428378	361894	222350	719044	266035	471516	220392	70913.9	347305	276941	215365	310167
1442.06	17.4964								206144	110864	225435	391140	371355	452655	279602	588673	202452	129574	398504	160629	624833	339557	433375	606873	530975	939218	376216	804803	339951	626286	780254	473078	1.20786e+06	1.20974e+06	1.5495e+06	547611	2.19891e+06	1.31865e+06	253636	395956	524034	563769	685060	736663
512.777	4.86272								205753	344756	592857	694911	548972	416619	1.15855e+06	74451.9	339426	314393	158969	98717.1	379504	170961	347432	560903	203329	271768	174501	123605	797986	425881	632311	389750	925369	251211	253155	227406	781687	1.09574e+06	253680	336333	382341	310374	298280	906518
1442.08	15.2824								205066	678463	297549	357757	300775	341153	221198	225384	236175	498251	820277	447126	852697	565211	372626	743363	547883	289150	535745	787729	1.11391e+06	927334	570499	800286	2.9729e+06	2.12579e+06	1.78876e+06	1.24402e+06	1.23917e+06	653412	161918	284212	283046	319353	437182	1.13257e+06
554.951	14.9632								200556	439277	597429	299698	286038	284618	166849	235399	575703	261712	463436	468911	207503	228722	227357	921431	404191	271305	1.12522e+06	897818	780023	769415	727035	1.81885e+06	504867	291832	907937	747981	640034	619907	664188	441477	888794	652807	576724	1.09493e+06
698.887	15.5692								197191	204238	27825.5	202798	73279.7	235132	131078	129874	138744	71278.5	85444.8	153278	54561.3	68249	0	0	168749	246466	111812	205174	144743	84743.8	106778	123273	830657	385985	605802	865413	1.22626e+06	290825	46513	151292	56695.5	204153	146247	68980.5
554.83	11.6337								193720	84684	90697.8	201080	156909	163161	246999	119913	82728.9	134443	200201	174067	33092.2	151177	114277	112934	117897	83460.2	307392	308088	356246	953109	1.09812e+06	600724	223500	55686.1	235690	56832.8	76323.7	99883.3	75434.9	86347.1	78737	290743	335137	476401
618.841	19.7618								188663	149187	380607	888449	659219	905725	1.47353e+06	1.05162e+06	1.03151e+06	780161	297182	323230	417986	1.92431e+06	867398	1.19409e+06	918932	1.34072e+06	338399	470977	285575	552002	791400	448657	1.20051e+06	825814	2.36948e+06	1.57769e+06	920439	1.84693e+06	1.11708e+06	704736	1.08262e+06	438052	358303	266186
505.835	4.55929								188404	60446.3	209500	184607	72757.3	0	505311	128679	678770	146414	136782	571844	251607	116933	176633	406578	34817.2	309701	120312	248812	471793	273919	238151	146088	192467	114179	987317	147820	201896	105552	948551	219357	1.28116e+06	733305	924424	708219
1136.09	21.7039								187698	135979	204636	285189	410016	1.38925e+06	319198	1.31943e+06	762173	454349	418155	1.69248e+06	750274	722046	391042	819470	1.3795e+06	831444	1.13732e+06	1.75329e+06	896051	2.57369e+06	1.58109e+06	1.04542e+06	3.71557e+06	2.3115e+06	3.03478e+06	3.51664e+06	3.90609e+06	5.30861e+06	219931	907217	126394	782886	1.07676e+06	1.12217e+06
466.779	13.3584								187271	159725	298620	391309	274415	176723	473074	566022	263317	665918	628989	1.54009e+06	183870	256641	507765	692980	279774	490707	388662	922456	255472	210729	251691	402694	477090	107950	784542	144998	316881	376324	918098	864109	419762	186945	358656	483531
672.759	12.9878								181566	161190	21985.7	544234	29713.7	88385.8	313461	106385	253736	274418	401169	118286	641371	787714	1.23908e+06	632727	791477	702826	837872	1.18793e+06	111039	462644	234260	128743	428112	127704	106662	192297	220061	108196	269610	180261	65040	248441	20819.9	65554
1026.98	20.2234								181187	219008	363350	342820	310501	232589	271449	259261	351591	99771.3	275471	160284	265791	196434	217302	353313	165294	121451	456280	259357	175833	1.13415e+06	609993	556576	787988	453962	817419	663716	722552	1.04915e+06	192941	234456	141795	314997	294089	236920
512.923	15.3122								180006	285051	269941	510039	255263	757381	120878	122053	156596	201452	350545	183382	202014	178493	167074	348270	182151	263902	814568	564390	321584	566418	521500	900035	1.56314e+06	3.00284e+06	1.39068e+06	1.32868e+06	2.20063e+06	844354	42421.9	96575.8	229771	286059	336654	175653
460.91	23.1087								176764	565328	246839	331516	193379	410999	147322	835611	685286	231326	486292	901453	244410	95363	116891	348583	140359	228161	1.80336e+06	902858	904545	1.99787e+06	1.2357e+06	1.96163e+06	268742	918712	641360	617514	279109	770400	248754	143846	192734	362862	561306	384992
643.035	27.2845								175527	236413	192441	616892	871834	343803	803362	333867	854365	297758	161533	260181	144040	255924	197367	143423	215955	437698	703349	1.01213e+06	503258	592611	712181	928020	861723	928055	693718	1.97616e+06	849980	919595	360087	199140	347744	452663	503651	637694
1098.98	13.1423								174745	890650	541657	279169	78310.4	132496	2.28445e+06	94706.1	370287	29890.2	413285	620208	498892	366491	836956	160191	373488	225647	1.10507e+06	616456	896158	584317	1.6867e+06	157722	590659	2.19223e+06	194715	541273	1.9719e+06	1.65808e+06	579683	444927	153917	845245	217152	406812
1099.7	13.0974								174745	174853	138726	279169	372288	337883	826641	11908.8	370287	29890.2	29626.3	215830	0	55591.7	179993	0	118139	103128	333739	937397	867960	193461	1.78403e+06	520895	606143	0	766705	0	280223	355316	959238	386616	14248.3	203889	320924	406812
400.855	12.5329								174573	294563	375219	333858	488187	603111	414456	680358	165194	351824	411577	238993	668484	537129	309531	705458	547373	523526	323692	217201	298446	528779	613341	948806	834435	1.00961e+06	325816	836867	683809	602270	238282	249797	355792	404093	254817	206969
434.798	14.6501								172594	245147	304527	144952	165380	234503	738913	1.03975e+06	600489	622609	307629	191909	240134	354275	185830	316708	276620	274647	465207	315036	556392	584436	277307	480037	568956	521886	359311	452610	485576	559333	427178	572858	300359	2.66527e+06	1.72069e+06	2.34402e+06
690.532	15.6883								171196	232940	346290	364571	250509	523515	332907	652715	445865	56383.2	133405	121827	98631.3	89899.6	0	172485	314156	115148	460326	301304	372095	878201	1.22394e+06	955771	3.20144e+06	2.54502e+06	4.32399e+06	1.8565e+06	3.89393e+06	2.94436e+06	131410	249645	453018	402810	510274	383880
676.964	23.5229								168303	82863.8	147264	367582	221100	327532	83298.2	116706	309853	217052	112547	132824	359000	125214	223700	105118	103180	145206	333226	303066	228603	419619	545285	572077	558707	857977	369352	1.28922e+06	498809	1.24256e+06	500196	925264	458175	1.19948e+06	1.32164e+06	1.04062e+06
470.916	17.5825								160409	478039	155590	209376	399386	128400	168173	109661	75920.9	2.39637e+06	2.0415e+06	1.75744e+06	55217.6	245902	240915	139834	90414.7	132318	111617	430529	58466.7	615362	662728	575562	164257	546613	191010	806053	406010	991616	118253	214314	123171	626586	267143	410224
755.851	12.6352								151574	188120	0	211313	369997	552212	133637	415842	237954	22500.4	44668.8	136764	102438	72601.1	74248.1	248681	28351.9	155071	76979.6	24896	244943	184134	126693	88549.4	214466	401348	382243	79753.9	221468	256153	433471	313306	418566	155049	639825	1.67381e+06
584.67	15.4825								150211	570756	177684	168667	362247	310964	303193	774595	557446	366984	623582	1.04532e+06	800819	128197	253638	552780	368946	203251	1.11764e+06	229161	593368	823814	1.12184e+06	1.6022e+06	859896	481371	389119	589621	1.05423e+06	730348	462864	287359	605547	296934	221415	1.17847e+06
1015.99	21.7628								145565	198902	157506	191616	168859	420400	661748	211338	1.0534e+06	35035	1.3374e+06	387784	443607	511352	860944	278960	1.04352e+06	142042	72885.8	858228	218255	370248	1.26755e+06	657039	1.20431e+06	1.91723e+06	1.03276e+06	831756	1.36099e+06	1.77696e+06	564236	326323	504608	314530	390078	530430
1135.08	21.7028								143319	357804	427103	950733	782121	965172	1.83376e+06	1.93523e+06	1.73293e+06	1.82919e+06	1.56905e+06	2.44664e+06	575151	2.28963e+06	1.42712e+06	1.1489e+06	902192	704626	2.27396e+06	2.16364e+06	1.6537e+06	2.6817e+06	1.58784e+06	2.16931e+06	6.18291e+06	1.59807e+06	4.71529e+06	6.02098e+06	5.6941e+06	5.01677e+06	1.23177e+06	1.20949e+06	745153	1.57079e+06	1.87919e+06	2.39492e+06
669.066	27.5371								143065	163313	227110	185331	752027	670573	1.28547e+06	1.11681e+06	1.59359e+06	607520	166157	1.23449e+06	199218	366882	181967	228820	885071	465913	514263	336583	246275	369601	885083	1.63396e+06	302841	345690	506071	223767	345395	348593	324327	260473	487340	227866	190668	199860
288.804	20.8994								137805	115762	92166.8	306199	103542	238917	638661	1.46902e+06	257187	393499	332059	435351	111797	191838	74145.3	126845	100298	54435.7	169985	120423	109075	260981	510089	134690	240376	265135	217315	649343	204912	176039	179444	121380	296070	131997	191653	52813.6
705.094	27.6822								135253	140751	80711.3	199408	449975	287155	835048	910779	839010	97417.4	238709	586520	200208	317349	216552	198263	424014	230424	312834	100731	166521	119085	1.03729e+06	969352	362533	142892	268342	144766	234470	159102	329790	200322	115898	112922	150571	262074
704.827	16.4474								132035	72908.1	200857	224874	479344	182039	395595	502327	284882	46312.9	342752	307288	96157.7	254389	63932.5	252950	111788	151869	296745	255839	123873	540707	202475	406867	3.81374e+06	2.78666e+06	4.22839e+06	812360	3.95724e+06	887346	90662.6	304060	199127	34700	70352.8	422824
657.821	14.3031								131011	152072	112405	272870	598260	725934	677301	169083	594920	144265	311606	247868	230963	423886	80528.1	594975	199684	405719	137099	1.11349e+06	212722	133299	0	1.00751e+06	565227	1.2012e+06	815100	311526	596349	518828	751997	1.58083e+06	447055	451831	2.10134e+06	681529
550.93	20.4845								129086	402644	158328	154027	179204	334348	126357	289148	337814	397246	124555	199271	505221	380971	230860	158784	223962	163582	896419	223625	324312	960541	991490	1.07272e+06	180014	234702	171145	165179	265519	296708	355463	188283	211175	875659	357303	156214
689.063	27.237								128599	120849	128381	870291	555804	973830	1.47745e+06	1.63596e+06	2.28467e+06	301005	300842	901368	170034	201148	172037	157946	80466.1	528407	151715	139083	291650	484761	2.05578e+06	2.26455e+06	264491	464710	350284	176905	398481	549193	768126	520572	556071	150390	82788.6	194304
495.833	21.4733								126481	565383	150230	164949	491648	500846	611401	737198	457494	382163	506105	275958	330120	284876	220838	595656	778991	340763	547577	736484	158879	781254	378035	754203	1.0566e+06	1.47454e+06	843037	952546	1.05455e+06	454376	810281	900911	301510	543617	490402	603167
620.763	19.7057								125772	96441.8	115971	264145	257835	401243	1.19751e+06	708519	900544	247446	248139	169092	407843	820387	261514	347889	969783	952643	126700	435892	158575	314056	243106	331938	1.38895e+06	267644	992020	718838	372386	311909	249103	281516	357531	395945	156027	278540
508.735	4.57335								125710	280993	322568	87340.9	178140	175233	562619	313051	343494	451166	284970	215527	342451	294643	188005	252275	597556	389187	189890	439943	512028	434860	447941	700270	387177	162693	258690	378910	354946	115118	415937	660188	181388	561102	188773	404181
656.784	5.15268								121662	260266	231698	798334	256354	156508	679839	814707	1.06232e+06	106004	384234	921662	399668	205264	258349	590385	274652	633829	412961	68136.4	324700	144085	163534	243735	361578	543789	650844	379696	1.36507e+06	913515	134306	256704	249035	324561	484675	676642
680.867	19.8043								111289	118321	112508	91325.1	193480	165232	153227	144680	196126	143284	302865	342235	92552.2	292306	540521	323981	404707	77326	2.38459e+06	1.68452e+06	2.72679e+06	1.37453e+06	1.02426e+06	1.62984e+06	160797	67298.4	233019	205341	442372	280996	240141	293978	304757	60335.6	306926	263855
508.936	20.1396								98133.1	433805	81361.7	211189	340055	138305	314931	213682	374734	108037	166944	303263	81275.1	185177	109289	96563.5	115689	225714	100859	275047	96729.9	207861	98914.8	180421	449699	323540	634850	755037	677539	678192	84070.1	74606.5	306555	144466	193611	111762
620.84	16.5755								97461.7	89369.7	157224	167418	205263	76867.3	61995.6	144757	25009.9	72691	132618	71167.7	70350.3	27220.8	83677.9	71324.6	140830	38648.4	127631	96362.8	69297.7	270924	128919	230334	328621	989899	469704	248688	101684	84683.7	55175.6	87125.1	97578.6	125683	35734.8	237779
926.913	19.796								95820.1	589648	120928	154817	1.16372e+06	213751	108585	77563.8	268962	93101.9	220287	111621	120830	304067	338408	373431	63480.8	878953	210295	78417.4	115995	520185	238703	12595	490769	137317	736565	130383	46819.3	508824	68929.8	63660.2	158645	272508	213929	105936
390.921	19.8954								90283.5	49992.3	62538.4	176570	93534.1	87564.8	77194.4	58243.2	153534	149346	205911	94866.7	402870	275940	228688	97946.5	296900	250389	165851	699158	287941	577068	1.29666e+06	631725	139144	113484	625796	114140	102417	243430	84500.7	101174	68235.7	164593	158071	51428.5
849.151	26.7161								83305.4	45686.6	164381	719433	900766	498340	1.26928e+06	1.45975e+06	1.01328e+06	197315	107368	719094	99396.7	61133.9	42274.2	142242	141033	141466	249047	71946.4	53392.2	212951	896456	579544	527194	159299	70870.7	41895.7	163837	189247	675762	670180	451901	82642.6	68861.9	191637
472.887	21.1472								76769.4	175702	179255	151359	166443	199076	456230	395290	77282.5	278142	566929	229910	205025	283546	99971.9	217658	113991	131200	171612	154821	60066.3	122728	289437	432037	217527	232836	139676	183379	105957	277142	355107	372169	676482	2.44833e+06	2.37089e+06	2.59092e+06
1443.01	17.3771								76170.9	155558	106010	150516	150312	90197.4	150760	149115	198339	118723	87512.6	370115	308038	538802	213952	291014	558082	226100	221098	336640	162834	273777	337546	345363	911369	1.0499e+06	710768	739189	518212	460309	252412	158302	163542	333310	350223	146988
511.932	19.8132								73229.3	204077	80248.4	106690	119485	81869.9	76032.9	133973	115609	148249	69524.3	69258.3	258261	152156	106790	132589	85442.4	183909	576347	202367	560032	121177	719025	395314	129972	154819	206500	97205.8	135341	133487	292425	142539	150543	131801	225351	243103
741.06	27.566								70778.7	144189	117362	604146	916088	930105	1.20135e+06	1.20959e+06	1.23893e+06	170855	95436.5	256569	147055	162141	93749.4	154888	156025	245102	96040	77122.8	148928	145953	1.19866e+06	1.43269e+06	193919	223002	313575	274953	237019	394324	391201	338131	369501	89754.8	158805	75608
363.927	21.3293								66005.1	203828	42177.3	84532.8	105372	94093.1	136758	203737	243975	89952	138594	140110	103775	124776	208671	172428	243295	187763	129005	483856	303388	115549	170600	231354	1.4195e+06	991258	849818	435421	1.09558e+06	404165	145813	148644	265325	216735	218613	162867
536.803	15.2106								58789	163975	175240	382418	136721	120715	242816	309935	75455.2	187979	167447	181523	181774	203314	347034	336970	779664	285221	420259	104547	35819.9	226574	313249	292753	158089	302295	449049	241278	43392.2	279168	82895.1	174769	93541.8	394835	94113.1	234307
318.868	17.3233								49348.3	17482	111524	45432.2	87668.8	97661.2	108556	54070.9	63008.7	45993.7	48585	148134	85032.3	138321	47322	100816	87440.6	39199.3	101312	59203.5	80130.2	138885	285462	73359.1	1.32252e+06	2.47044e+06	1.54175e+06	547551	550502	253673	147806	54993.9	22956	58310.5	60406.1	31251.1
1050.97	16.0014								0	101880	0	211365	0	50175.2	118855	191643	142994	63799.1	21991.7	53603.1	54642.2	41129.2	12903.1	36222.4	62284.5	124898	0	86760	0	0	66296.8	177677	1.02548e+06	313249	373016	137671	1.14796e+06	75994.3	0	151868	126534	77758.4	60743.9	154078
1112.81	13.0411								0	0	0	128523	0	0	0	0	15010	0	601359	0	0	17197.1	23453	0	0	0	0	0	331588	0	0	204294	302447	0	0	1.02094e+06	0	0	0	0	87979.3	0	34450.2	66408.2

## Sheet: pear
Metabolite content is calulated from the Areas of chromatographic peaks and expresdsed as Intensity, in arbitrary units
		antioxidant activity (mmol TE/Kg FW)	FRAP						3.08352	3.45073	3.14291	2.8223	3.14355	2.71169	2.33601	2.19087	2.29969	2.3828	1.93002	1.8125	2.22996	1.57712	1.80172	1.98109	1.85215	2.22459	2.32067	1.4287	1.72061	1.85763	1.86744	1.76351	1.70867	1.90996	1.50035	1.37148	1.37859	1.51501
									2014	2014	2014	2015	2015	2015	2014	2014	2014	2015	2015	2015	2014	2014	2014	2015	2015	2015	2014	2014	2014	2015	2015	2015	2014	2014	2014	2015	2015	2015
				OPLS analysis	OPLS-DA	OPLS-DA	OPLS-DA	OPLS-DA	Abate Fetel	Abate Fetel	Abate Fetel	Abate Fetel	Abate Fetel	Abate Fetel	Conference	Conference	Conference	Conference	Conference	Conference	Decana	Decana	Decana	Decana	Decana	Decana	Kaiser	Kaiser	Kaiser	Kaiser	Kaiser	Kaiser	Williams	Williams	Williams	Williams	Williams	Williams
m/z (-)	rt	Putative identification	metabolite class	pq(corr)	pq(corr)1	pq(corr)2	pq(corr)3	pq(corr)4	Abate 2014-1	Abate 2014-2	Abate 2014-3	Abate 2015-1	Abate 2015-2	Abate 2015-3	Conference 2014-1	Conference 2014-2	Conference 2014-3	Conference 2015-1	Conference 2015-2	Conference 2015-3	Decana 2014-1	Decana 2014-2	Decana 2014-3	Decana 2015-1	Decana 2015-2	Decana 2015-3	Kaiser 2014-1	Kaiser 2014-2	Kaiser 2014-3	Kaiser 2015-1	Kaiser 2015-2	Kaiser 2015-3	Williams 2014-1	Williams 2014-2	Williams 2014-3	Williams 2015-1	Williams 2015-2	Williams 2015-3
418.931	21.9082	Ferulic acid derivative	Hydroxycinnamic acid and derivatives	0.140996	0.449445	0.0712754	-0.358996	0.0985977	939427	862507	1.02416e+06	1.13886e+06	838447	866892	973445	1.5506e+06	826086	610407	1.10067e+06	1.03702e+06	963757	968474	505476	1.2258e+06	201242	903438	522056	555100	376140	695972	789607	676141	1.01547e+06	1.26732e+06	799642	1.34752e+06	585341	966399
340.868	4.04878	Caffeic acid hexose	Hydroxycinnamic acid and derivatives	0.702823	-0.602112	0.679262	0.179007	-0.272736	1.98816e+07	1.82194e+07	1.95123e+07	2.72136e+07	2.66042e+07	2.15742e+07	4.99189e+07	5.71408e+07	5.16856e+07	5.29542e+07	6.21962e+07	5.73196e+07	2.20767e+07	1.8435e+07	2.47411e+07	2.58287e+07	3.82607e+07	3.20223e+07	7.89921e+07	6.23675e+07	6.14932e+07	7.0132e+07	6.31986e+07	7.09453e+07	2.72559e+07	1.86182e+07	2.37142e+07	3.0324e+07	2.73643e+07	3.05987e+07
340.872	12.7106	Caffeic acid hexose	Hydroxycinnamic acid and derivatives	0.154958	-0.0354066	0.413155	0.253102	-0.452704	2.5001e+06	636008	1.30274e+06	1.96252e+06	2.51604e+06	1.93803e+06	3.10009e+06	735774	1.04311e+06	1.17541e+06	1.76539e+06	2.61788e+06	368817	218988	903980	649881	513852	823561	2.35149e+06	2.19101e+06	2.69801e+06	1.52328e+06	2.15797e+06	2.40509e+06	720667	347086	830390	1.13733e+06	494522	2.41395e+06
340.877	14.5533	Caffeic acid hexose	Hydroxycinnamic acid and derivatives	-0.308571	0.603403	-0.285783	0.123638	-0.489173	2.58305e+06	3.00374e+06	3.97798e+06	6.88454e+06	4.8185e+06	4.60055e+06	1.1462e+06	888244	1.32996e+06	1.11772e+06	1.58487e+06	1.44894e+06	1.13266e+06	1.14439e+06	671669	1.99798e+06	1.15063e+06	1.53679e+06	1.54111e+06	1.20236e+06	1.07979e+06	1.25972e+06	1.45635e+06	1.89631e+06	1.00089e+06	993605	1.68122e+06	3.02817e+06	651389	1.61759e+06
376.829	4.01817	Caffeic acid hexose, adduct	Hydroxycinnamic acid and derivatives	0.126343	-0.172252	0.327705	-0.180088	-0.483459	8.80868e+06	1.1506e+07	1.12273e+07	1.44492e+07	1.30467e+07	1.43038e+07	5.09425e+06	1.99653e+07	1.12352e+07	1.95871e+07	2.49593e+07	2.56362e+07	3.51062e+06	6.53431e+06	1.09194e+07	1.21973e+07	1.65266e+07	3.56391e+06	6.49534e+06	2.29611e+07	5.0158e+06	2.15688e+07	2.35925e+06	2.55407e+07	2.18698e+06	6.8496e+06	6.70969e+06	1.97261e+06	6.86658e+06	8.39914e+06
386.847	4.19317	Caffeic acid hexose, adduct	Hydroxycinnamic acid and derivatives	-0.322582	-0.519253	0.65388	0.253727	-0.23006	1.83946e+07	2.35137e+07	2.47497e+07	3.8438e+07	3.58534e+07	3.55498e+07	5.40941e+07	6.84353e+07	5.46791e+07	5.81114e+07	6.81305e+07	9.10712e+07	2.2469e+07	2.82997e+07	2.65148e+07	4.30205e+07	3.78217e+07	2.88633e+07	8.26552e+07	9.5037e+07	8.2648e+07	6.98035e+07	1.10503e+08	8.46216e+07	3.29943e+07	2.78173e+07	3.63402e+07	4.37966e+07	3.14059e+07	4.23652e+07
352.839	13.1405	Caffeoyl quinic acid 1	Hydroxycinnamic acid and derivatives	0.094001	0.640602	0.421369	0.033864	0.130046	1.63354e+08	1.48913e+08	1.64316e+08	1.50074e+08	1.44466e+08	1.55557e+08	1.81759e+08	1.99403e+08	1.91713e+08	1.07263e+08	9.97174e+07	1.08484e+08	1.0832e+08	1.05186e+08	1.14133e+08	9.30549e+07	8.18997e+07	9.27133e+07	1.47354e+08	1.40291e+08	1.43215e+08	1.0248e+08	1.16745e+08	1.1178e+08	1.81012e+08	1.95593e+08	1.61301e+08	1.76386e+08	1.82246e+08	1.56701e+08
450.794	13.1141	Caffeoyl quinic acid 1, adduct	Hydroxycinnamic acid and derivatives	0.219531	-0.0498571	0.453321	-0.125306	-0.54114	4.02494e+07	3.78065e+07	3.66385e+07	3.97997e+07	3.75258e+07	4.02794e+07	4.52817e+07	4.68629e+07	4.22203e+07	3.99251e+07	4.40687e+07	4.36839e+07	3.4817e+07	3.46632e+07	4.51546e+07	2.4407e+07	2.00721e+07	2.16235e+07	4.62286e+07	3.37239e+07	3.85858e+07	3.69979e+07	3.71959e+07	4.39786e+07	2.45044e+07	2.59738e+07	2.00346e+07	4.32808e+07	4.82876e+07	3.08687e+07
706.836	13.1491	Caffeoyl quinic acid 1, adduct	Hydroxycinnamic acid and derivatives	0.092918	0.604527	0.388122	-0.00811274	0.146782	1.42862e+08	1.50813e+08	1.50728e+08	1.4743e+08	1.39688e+08	1.32985e+08	2.07531e+08	2.15904e+08	2.32739e+08	6.2862e+07	5.7798e+07	5.13516e+07	7.00951e+07	6.45029e+07	7.36889e+07	6.06055e+07	5.14933e+07	5.24831e+07	1.2941e+08	1.27301e+08	1.17608e+08	7.75505e+07	7.72777e+07	6.93157e+07	1.88058e+08	1.84104e+08	1.71103e+08	1.87847e+08	1.75068e+08	1.58196e+08
352.834	15.0759	Caffeoyl quinic acid 2	Hydroxycinnamic acid and derivatives	0.510388	0.699493	-0.303259	-0.318317	-0.01701	5.90852e+07	6.52681e+07	6.71183e+07	4.89849e+07	5.76995e+07	6.13205e+07	4.00868e+07	4.15379e+07	4.40212e+07	4.75911e+07	4.31188e+07	4.31305e+07	4.80183e+07	4.38232e+07	4.74539e+07	4.3817e+07	3.84752e+07	3.7469e+07	2.63037e+07	2.18037e+07	2.40726e+07	2.29889e+07	2.60069e+07	2.33738e+07	6.61611e+07	7.32168e+07	6.14628e+07	3.23953e+07	2.93591e+07	3.03384e+07
350.913	14.773	Caffeoyl quinic acid 2, adduct	Hydroxycinnamic acid and derivatives	0.457487	-0.45715	-0.818066	0.00885766	-0.132018	6.8482e+06	6.39783e+06	6.46292e+06	9.87141e+06	7.73332e+06	6.07797e+06	2.59934e+06	2.81032e+06	1.55926e+06	3.04944e+06	3.11399e+06	3.16743e+06	1.46359e+07	1.21327e+07	1.38102e+07	1.87134e+07	1.64913e+07	1.63499e+07	5.32991e+06	5.64775e+06	4.63364e+06	8.93722e+06	8.8971e+06	7.93747e+06	931089	785388	993318	1.33175e+06	2.61146e+06	1.20963e+06
450.787	15.0641	Caffeoyl quinic acid 2, adduct	Hydroxycinnamic acid and derivatives	0.421422	0.179102	-0.429253	-0.51397	-0.224806	3.43353e+06	4.70128e+06	4.46949e+06	4.20478e+06	3.63397e+06	3.6659e+06	2.60604e+06	2.29498e+06	2.66162e+06	3.53346e+06	6.26871e+06	3.50423e+06	4.13841e+06	4.27652e+06	5.71872e+06	3.85749e+06	3.34475e+06	2.70426e+06	1.60905e+06	1.58461e+06	1.1313e+06	1.85116e+06	1.86799e+06	1.99007e+06	4.12472e+06	3.13428e+06	3.24413e+06	1.46579e+06	1.66042e+06	1.27064e+06
706.769	15.0871	Caffeoyl quinic acid 2, adduct	Hydroxycinnamic acid and derivatives	0.185719	0.627433	-0.34367	-0.275652	0.0581938	1.53838e+07	1.62947e+07	1.79262e+07	1.0551e+07	1.38056e+07	1.42724e+07	7.28789e+06	7.7801e+06	7.65162e+06	1.24995e+07	8.97928e+06	1.11517e+07	1.17953e+07	1.09821e+07	1.03875e+07	1.05771e+07	1.08821e+07	8.18708e+06	3.96734e+06	3.10487e+06	3.13008e+06	3.12462e+06	3.20193e+06	4.06832e+06	1.98433e+07	1.87045e+07	1.76596e+07	5.99137e+06	4.46812e+06	5.13148e+06
514.799	13.1625	Caffeoyl quinic acid hexose	Hydroxycinnamic acid and derivatives	0.134924	-0.152503	0.0988911	0.130271	-0.290933	218165	126904	1.44496e+06	664610	751216	499747	378128	652891	1.14429e+06	454900	274174	460475	559060	668416	617704	339278	690894	226118	511012	1.03416e+06	730456	591608	586928	922029	369863	276500	325527	666251	416923	594238
514.807	11.8555	Caffeoyl quinic acid hexose	Hydroxycinnamic acid and derivatives	0.0559492	-0.168624	0.479796	0.302997	-0.143292	911408	690018	1.08809e+06	936716	2.16364e+06	1.8204e+06	2.63925e+06	2.13447e+06	2.74474e+06	1.40961e+06	727902	377514	1.26567e+06	1.29259e+06	501802	601472	33452.6	392718	1.30485e+06	3.78346e+06	3.3816e+06	2.63511e+06	2.31534e+06	2.07605e+06	2.42848e+06	1.94736e+06	791520	597856	1.18147e+06	1.01404e+06
514.837	14.6359	Caffeoyl quinic acid hexose	Hydroxycinnamic acid and derivatives	-0.0837835	-0.216638	0.046022	0.107762	-0.185408	716132	1.04934e+06	933451	1.08754e+06	711853	440019	263002	619878	1.13678e+06	949026	812881	1.35481e+06	714547	888426	1.0406e+06	698340	921845	815652	1.0406e+06	959015	742860	1.04691e+06	1.48283e+06	834816	1.19194e+06	792758	911312	239157	286237	688390
324.86	13.1639	Coumaroyl hexose	Hydroxycinnamic acid and derivatives	-0.30018	0.0229712	0.359571	-0.572022	0.306962	161254	253809	372770	416276	203887	850025	1.24415e+06	761894	1.15175e+06	1.62783e+06	2.20461e+06	1.21994e+06	684282	86585.8	320321	1.26882e+06	729139	676634	225044	287771	435450	181246	581692	347988	1.12096e+06	721299	706790	885640	513968	1.9056e+06
440.846	14.7346	Coumaroyl (malonyl) hexose	Hydroxycinnamic acid and derivatives	-0.483271	0.533533	0.16103	0.189329	0.740898	1.7404e+06	2.68003e+06	1.60641e+06	2.42504e+06	2.23739e+06	2.1629e+06	362981	222180	135931	335346	271102	199562	642383	634744	1.03559e+06	597233	707865	509220	127104	302812	186175	240204	122753	358296	1.51767e+07	1.65953e+07	1.47205e+07	2.06898e+07	1.86837e+07	1.893e+07
441.83	14.3006	Coumaroyl (malonyl) hexose, isotope	Hydroxycinnamic acid and derivatives	-0.451417	0.481431	0.168878	0.173594	0.669749	454170	441006	174793	558345	122993	76473.9	-	131727	127323	86157.7	166030	113531	161198	178497	112952	101038	68958.3	463340	74536.3	-	76566	45963.6	86542.6	99102.1	604266	3.04562e+06	3.20323e+06	2.42772e+06	2.68331e+06	792922
514.816	21.5114	Caffeoyl quinic acid	Hydroxycinnamic acid and derivatives	-0.104275	0.103674	0.477725	0.801413	-0.137173	2.06871e+07	2.27358e+07	2.22207e+07	1.57018e+07	1.2994e+07	1.38197e+07	1.22329e+07	1.34867e+07	1.09242e+07	1.07094e+07	4.64885e+06	6.37785e+06	2.13182e+06	2.61585e+06	2.27906e+06	1.53668e+06	1.24236e+06	2.063e+06	4.37712e+07	3.73756e+07	3.54963e+07	2.31538e+07	3.07253e+07	3.1982e+07	2.39497e+07	3.00221e+07	1.7423e+07	1.59043e+07	2.04414e+07	1.6111e+07
532.847	20.2104	Caffeoyl quinic acid methyl derivative	Hydroxycinnamic acid and derivatives	0.058326	0.631466	0.17666	0.612645	0.118452	5.08458e+06	4.68444e+06	5.59778e+06	4.28992e+06	5.39907e+06	5.87626e+06	2.00805e+06	1.45902e+06	1.07965e+06	549395	407768	754714	586520	448865	517521	628271	466325	453643	5.16082e+06	5.88489e+06	5.24861e+06	3.71247e+06	3.19538e+06	2.04013e+06	8.49867e+06	8.86305e+06	6.73238e+06	4.05274e+06	4.52739e+06	3.46538e+06
515.813	21.6351	Caffeoyl quinic acid, isotope	Hydroxycinnamic acid and derivatives	-0.0776233	0.236767	0.396448	0.590343	-0.0243277	5.28324e+06	2.69754e+06	4.85442e+06	2.55636e+06	3.49263e+06	3.98507e+06	2.64113e+06	2.91116e+06	2.35567e+06	2.10178e+06	1.2338e+06	1.70311e+06	383274	794258	636906	157508	442993	664807	1.02671e+07	9.79745e+06	921965	5.91697e+06	6.41034e+06	719373	5.58041e+06	6.71174e+06	4.87982e+06	4.80708e+06	2.9059e+06	3.89001e+06
342.87	12.1853	Dihydroxycaffeic acid hexose	Hydroxycinnamic acid and derivatives	0.707065	0.426981	-0.666992	-0.0387553	-0.339821	3.51378e+06	4.23189e+06	4.3369e+06	4.45052e+06	2.35332e+06	4.15484e+06	1.98333e+06	1.41825e+06	1.76243e+06	1.89762e+06	1.05687e+06	1.28694e+06	3.18421e+06	3.32614e+06	2.17553e+06	2.36715e+06	1.68721e+06	3.67035e+06	1.53898e+06	1.39663e+06	999908	1.21161e+06	1.4885e+06	1.79206e+06	2.52907e+06	469826	2.13337e+06	2.41579e+06	2.05337e+06	1.48085e+06
314.764	4.37076	Dihydroxybenzoic acid hexose	Hydroxybenzoic acid	0.181437	0.0982982	0.353774	-0.4894	-0.22505	437974	268488	188247	140984	-	70268.8	133619	246484	467390	670193	249514	352629	124487	103489	-	32220.1	197247	157695	-	65804.8	-	-	256868	31562.3	-	159735	-	-	-	59433.4
657.856	12.5565	Feruloyl quinic acid derivative	Hydroxycinnamic acid and derivatives	-0.139926	-0.439028	-0.229797	-0.673912	0.139767	4.12019e+06	3.88343e+06	749424	1.64474e+06	5.20013e+06	1.442e+06	8.03819e+06	6.01466e+06	8.3064e+06	2.66072e+07	2.4371e+07	1.9713e+07	1.59627e+07	1.82349e+07	1.87961e+07	1.84207e+07	2.02382e+07	1.93859e+07	3.03913e+06	3.44422e+06	3.21724e+06	2.51295e+06	1.56119e+06	768113	4.46908e+06	6.45113e+06	3.94725e+06	740644	1.09047e+06	1.01373e+07
430.948	14.3921	Sinapic acid derivative	Hydroxycinnamic acid and derivatives	-0.411823	0.526096	0.311821	0.0504611	0.60149	3.68131e+06	3.39542e+06	3.78714e+06	7.15504e+06	6.60482e+06	5.19779e+06	5.11317e+06	5.39138e+06	4.71904e+06	5.45293e+06	6.4101e+06	4.07453e+06	2.80274e+06	3.14433e+06	4.64793e+06	5.17657e+06	3.19121e+06	4.94279e+06	3.71516e+06	4.85339e+06	4.36867e+06	4.01779e+06	3.83514e+06	4.99106e+06	8.12205e+06	8.61113e+06	7.44759e+06	1.04283e+07	9.22251e+06	9.55384e+06
384.878	14.2129	Sinapic acid hexose	Hydroxycinnamic acid and derivatives	-0.18326	0.194177	0.537149	-0.486487	0.247561	1.38384e+06	951474	1.19328e+06	2.2652e+06	1.19199e+06	2.2739e+06	4.04366e+06	4.46914e+06	4.9934e+06	2.15471e+06	1.99575e+06	2.59336e+06	946941	1.16724e+06	1.0789e+06	2.14534e+06	1.5058e+06	1.42659e+06	1.04542e+06	1.85392e+06	1.43696e+06	1.07038e+06	2.29168e+06	961208	1.92359e+06	2.61318e+06	2.45212e+06	3.19722e+06	2.96652e+06	2.7463e+06
328.85	5.32425	Vanillic acid hexose	Hydroxybenzoic acid	-0.210684	-0.398104	-0.0578451	0.54025	-0.0088742	624763	643853	342414	183911	418634	562472	844487	136563	152036	535168	363995	121250	959527	579460	801742	569863	548526	526138	1.60753e+06	1.09551e+06	1.07916e+06	738765	521461	547687	392204	553567	771191	666066	554537	307319
288.795	12.91	Catechin	Procyanidins and flavan-3-ols	-0.160689	0.592128	0.0944358	0.315726	0.435224	380624	1.25162e+06	1.62509e+06	1.30667e+06	1.32957e+06	485692	46773.3	54408.6	513438	165635	114284	487103	166360	71170	84594.1	443178	230664	151673	881962	921260	753464	170386	401730	330593	2.75572e+06	1.59762e+06	3.80242e+06	2.40899e+06	538544	1.55461e+06
288.813	15.532	Epicatechin	Procyanidins and flavan-3-ols	0.760415	0.661202	-0.172312	0.311616	-0.534001	3.91872e+07	4.79863e+07	4.61379e+07	3.76465e+07	3.69613e+07	4.04027e+07	2.47076e+07	2.44704e+07	2.06679e+07	1.01058e+07	8.17497e+06	1.18615e+07	2.12024e+07	1.54244e+07	1.66179e+07	1.35562e+07	1.04208e+07	1.24589e+07	2.92979e+07	2.37393e+07	2.41576e+07	1.90458e+07	1.72742e+07	1.98934e+07	2.23232e+07	2.56231e+07	2.13849e+07	2.2049e+07	1.96859e+07	1.70642e+07
476.861	21.8978	Isorhamnetin-3-O-glucoside	Flavonoids	0.416883	0.495805	0.0689743	-0.643483	-0.196813	5.25229e+07	4.59969e+07	3.88579e+07	6.31933e+07	5.03086e+07	4.97014e+07	4.68169e+07	5.37895e+07	6.65894e+07	4.88397e+07	6.01143e+07	5.60706e+07	2.28688e+07	1.70643e+07	1.53903e+07	4.76357e+07	3.12331e+07	4.82126e+07	8.70795e+06	1.05162e+07	7.49572e+06	1.36039e+07	2.39725e+07	1.91967e+07	2.02998e+07	2.7481e+07	1.86319e+07	5.45089e+07	4.89879e+07	4.03548e+07
518.851	23.1677	Isorhamnetin-O-(acetyl)-glucoside	Flavonoids	0.351678	0.636137	-0.650459	0.180994	0.115598	7.04392e+07	6.84567e+07	5.39654e+07	9.04222e+07	6.90581e+07	6.36095e+07	3.46959e+06	3.11781e+06	4.24934e+06	3.01426e+06	3.74616e+06	2.60941e+06	3.94311e+07	2.91333e+07	2.5032e+07	6.67832e+07	4.87873e+07	6.76063e+07	9.05685e+06	7.20787e+06	6.57986e+06	1.31968e+07	2.31483e+07	1.81771e+07	3.56691e+07	4.56911e+07	4.29199e+07	6.18205e+07	6.47883e+07	6.09134e+07
622.881	21.2983	Isorhamnetin rutinoside	Flavonoids	0.523241	0.736324	0.325267	-0.401319	-0.342683	2.88917e+07	2.73674e+07	2.07496e+07	3.24812e+07	2.9374e+07	2.84535e+07	2.3653e+07	2.64959e+07	3.14509e+07	1.90127e+07	2.58116e+07	2.46581e+07	372841	303692	69770.5	172108	215206	176432	2.17549e+06	3.18499e+06	2.8679e+06	2.60006e+06	3.72931e+06	3.99472e+06	1.00981e+07	1.42246e+07	1.15052e+07	2.28496e+07	1.99013e+07	1.88588e+07
575.948	16.9932	Procyanidin P4, m/2-1 adduct	Procyanidins and flavan-3-ols	0.816431	0.561076	-0.196382	0.0935847	-0.596638	5.84012e+06	4.63455e+06	5.0884e+06	5.13532e+06	6.19e+06	5.34951e+06	3.25289e+06	3.92964e+06	1.94439e+06	976308	1.62487e+06	1.75892e+06	2.34281e+06	2.63127e+06	2.21679e+06	1.38226e+06	1.65534e+06	1.12618e+06	4.54762e+06	3.09403e+06	1.02737e+06	987833	2.22185e+06	1.1669e+06	2.34379e+06	3.18541e+06	1.97997e+06	2.30851e+06	913653	480755
576.268	14.9679	Procyanidin P4, m/2-1 adduct	Procyanidins and flavan-3-ols	0.381078	0.305265	-0.205228	0.136404	-0.148036	2.4401e+06	1.28478e+06	3.28322e+06	2.84854e+06	2.28717e+06	1.97059e+06	1.97213e+06	370915	1.22646e+06	1.06319e+06	1.45443e+06	385674	1.7135e+06	1.42564e+06	1.16827e+06	1.58989e+06	996628	1.30279e+06	1.38421e+06	1.89246e+06	2.34749e+06	847940	379235	1.20976e+06	5.37858e+06	454206	498571	1.22588e+06	593192	1.12702e+06
576.819	11.5738	Procyanidin P2	Procyanidins and flavan-3-ols	0.843012	0.57232	0.220925	0.367826	0.641497	3.63903e+06	3.5017e+06	3.3397e+06	5.34384e+06	4.30078e+06	3.81848e+06	2.08376e+06	1.32739e+06	2.2193e+06	966029	418586	1.2185e+06	971301	1.22742e+06	1.43831e+06	1.27518e+06	1.22154e+06	924425	5.23903e+06	4.11392e+06	3.74129e+06	3.04367e+06	2.69216e+06	2.90677e+06	1.6633e+07	1.61726e+07	1.41074e+07	1.05582e+07	9.68252e+06	9.62283e+06
576.838	19.6163	Procyanidin P2	Procyanidins and flavan-3-ols	0.829411	0.645388	-0.355933	0.238899	-0.525741	1.18799e+07	1.28872e+07	1.27358e+07	1.26267e+07	1.09217e+07	1.20996e+07	5.20981e+06	6.71691e+06	6.40627e+06	2.63924e+06	1.91248e+06	2.12553e+06	6.38672e+06	5.62227e+06	4.57661e+06	4.81228e+06	4.50189e+06	4.63104e+06	7.32878e+06	6.40345e+06	6.00618e+06	4.41742e+06	5.00721e+06	4.15196e+06	6.35078e+06	6.28687e+06	4.65325e+06	6.03203e+06	4.62442e+06	4.93498e+06
576.839	14.4243	Procyanidin P2	Procyanidins and flavan-3-ols	-0.384699	0.58136	-0.309319	0.27341	-0.597886	1.09284e+08	1.26488e+08	1.37133e+08	1.2828e+08	1.20184e+08	1.1304e+08	5.89545e+07	7.44926e+07	6.07406e+07	2.79261e+07	2.10477e+07	2.50556e+07	5.70496e+07	5.67512e+07	4.6184e+07	4.68731e+07	4.40444e+07	4.82944e+07	7.44031e+07	7.03904e+07	7.15077e+07	5.23183e+07	4.96286e+07	5.56396e+07	5.84101e+07	6.07691e+07	4.91913e+07	4.96073e+07	4.60348e+07	4.27025e+07
577.806	11.6324	Procyanidin P2, isotope	Procyanidins and flavan-3-ols	0.413118	0.583241	0.219723	0.384625	0.601326	1.17443e+06	887960	1.21865e+06	1.55961e+06	874213	1.39706e+06	388912	1.00965e+06	600614	115489	299123	163705	381177	322657	626300	140230	440467	370875	1.46539e+06	1.07592e+06	722599	680684	1.36568e+06	874132	4.12487e+06	3.92152e+06	3.00842e+06	2.57704e+06	2.32836e+06	3.367e+06
578.76	15.1096	Procyanidin P2, isotope	Procyanidins and flavan-3-ols	0.288199	0.290571	-0.386452	0.296431	-0.185536	2.98698e+06	1.77325e+06	1.6754e+06	2.16855e+06	1.12142e+06	1.32397e+06	421632	849159	693648	104413	228257	1.05977e+06	639928	928855	1.09618e+06	1.47622e+06	2.57126e+06	1.04678e+06	1.59842e+06	1.07211e+06	1.69787e+06	444845	878478	995149	2.7608e+06	743969	366963	714946	948698	924673
578.809	13.2133	Procyanidin P2, isotope	Procyanidins and flavan-3-ols	0.065235	0.195975	-0.211528	-0.0776393	-0.12014	58227.5	161936	469176	278820	729916	87610.6	121012	47858.4	105746	368282	202163	295644	109828	152588	272841	211510	154806	482993	157382	45448.9	161541	81146.4	89515.5	338997	331982	266402	70409.5	97386.6	277370	82334
578.859	20.7606	Procyanidin P2, isotope	Procyanidins and flavan-3-ols	-0.100598	-0.326186	0.662488	-0.561499	-0.179556	1.4267e+06	1.65135e+06	1.26894e+06	2.64266e+06	3.00394e+06	2.6132e+06	1.2447e+07	1.07838e+07	1.49317e+07	1.34401e+07	9.73206e+06	1.04222e+07	3.3948e+06	2.90184e+06	2.69635e+06	2.70294e+06	3.0329e+06	2.93284e+06	5.54898e+06	5.96029e+06	4.52747e+06	3.93264e+06	7.23814e+06	5.01578e+06	3.36557e+06	2.32818e+06	951076	3.33706e+06	2.62989e+06	4.08307e+06
579.84	20.7558	Procyanidin P2, isotope	Procyanidins and flavan-3-ols	-0.111514	-0.386464	0.649748	-0.480603	-0.20653	497237	495416	602457	915261	571665	839350	3.9849e+06	3.31768e+06	4.27926e+06	2.78427e+06	2.93265e+06	2.06793e+06	1.17095e+06	1.14751e+06	1.45209e+06	863060	636052	459671	1.76194e+06	2.06646e+06	1.72145e+06	1.63735e+06	2.07468e+06	1.41389e+06	513692	1.02897e+06	440172	1.0152e+06	993965	868333
580.838	15.0209	Procyanidin P2, isotope	Procyanidins and flavan-3-ols	-0.347716	-0.164819	0.38958	-0.487535	-0.182388	661409	679341	505742	485355	1.19605e+06	1.14843e+06	2.3432e+06	1.97593e+06	2.85001e+06	787011	1.55689e+06	1.14224e+06	743535	1.7708e+06	785799	1.06811e+06	438619	478924	1.78493e+06	1.16473e+06	498351	772430	493311	574710	601087	602897	471888	716494	1.20793e+06	781702
864.94	14.267	Procyanidin P3	Procyanidins and flavan-3-ols	0.813398	0.510418	-0.275051	0.250981	-0.538817	2.86688e+06	3.34768e+06	6.16854e+06	3.75246e+06	4.30052e+06	3.73739e+06	1.81807e+06	2.7236e+06	1.2114e+06	501598	587865	931879	1.36581e+06	2.11681e+06	1.01826e+06	965850	1.79509e+06	2.08151e+06	2.98616e+06	2.17897e+06	1.88078e+06	1.67843e+06	800291	1.54933e+06	1.71634e+06	2.24572e+06	694365	1.90747e+06	2.2316e+06	709995
864.969	16.359	Procyanidin P3	Procyanidins and flavan-3-ols	0.747699	0.626997	-0.30825	0.300018	-0.555273	2.76911e+07	3.35157e+07	3.10184e+07	3.00053e+07	2.57949e+07	2.80677e+07	1.32214e+07	1.46011e+07	1.39716e+07	4.16117e+06	4.33605e+06	4.16663e+06	1.13942e+07	1.27005e+07	1.16569e+07	9.15728e+06	9.70539e+06	1.05069e+07	1.79818e+07	1.63733e+07	1.47648e+07	1.18498e+07	1.07002e+07	1.16747e+07	1.40405e+07	1.57755e+07	1.06487e+07	1.26129e+07	1.1793e+07	9.81564e+06
865.936	14.2682	Procyanidin P3, isotope	Procyanidins and flavan-3-ols	0.73325	0.587749	-0.197729	0.113075	-0.260536	1.65739e+06	1.3248e+06	1.80277e+06	1.11857e+06	2.41695e+06	2.65187e+06	1.24657e+06	1.35708e+06	1.00102e+06	440369	95386.4	170212	1.01794e+06	890672	465811	711263	584723	617663	275928	1.38186e+06	642201	556343	770954	1.05126e+06	1.53208e+06	771496	1.60085e+06	1.27593e+06	720463	415075
865.937	16.4082	Procyanidin P3, isotope	Procyanidins and flavan-3-ols	0.556972	0.629484	-0.303278	0.241245	-0.427292	9.70625e+06	8.36081e+06	1.08841e+07	8.09384e+06	9.15067e+06	7.65982e+06	3.12039e+06	4.44945e+06	4.8371e+06	1.30465e+06	955943	2.48516e+06	2.96256e+06	3.88669e+06	4.20373e+06	4.13759e+06	3.65505e+06	2.08293e+06	6.03814e+06	4.94571e+06	5.33169e+06	3.12135e+06	3.35933e+06	553824	6.37686e+06	3.35614e+06	3.67641e+06	4.90232e+06	3.78633e+06	4.31258e+06
866.874	14.258	Procyanidin P3, isotope	Procyanidins and flavan-3-ols	0.273002	0.246188	-0.0434455	0.302479	-0.162002	560895	950189	116794	325663	361996	689146	731538	223568	219161	108084	58509.6	315636	487193	222051	109177	138982	176906	411722	476079	598466	697241	161347	440845	139607	614522	281988	422028	256037	400672	216770
1153	14.8806	Procyanidin P4	Procyanidins and flavan-3-ols	0.797699	0.523734	-0.29568	0.267379	-0.536116	2.75704e+06	5.60581e+06	4.88312e+06	2.44961e+06	3.25392e+06	3.47018e+06	970653	1.93117e+06	1.38752e+06	376735	241057	222433	1.08363e+06	943818	1.29733e+06	740001	661042	1.93506e+06	2.5207e+06	1.95704e+06	1.65201e+06	1.05716e+06	1.62423e+06	491270	2.07335e+06	693407	1.08289e+06	1.71967e+06	1.26938e+06	548630
1153.02	16.9784	Procyanidin P4	Procyanidins and flavan-3-ols	0.76479	0.647658	-0.302921	0.20231	-0.503633	7.80851e+06	7.26188e+06	7.0472e+06	6.4304e+06	6.07657e+06	7.78805e+06	2.28526e+06	3.59531e+06	4.36382e+06	782384	740863	542412	2.77709e+06	2.79e+06	2.69547e+06	1.99268e+06	2.17356e+06	2.18329e+06	3.84313e+06	4.07417e+06	3.12142e+06	1.63698e+06	2.03793e+06	1.81169e+06	3.99489e+06	2.67681e+06	2.68757e+06	3.72629e+06	2.81229e+06	1.41716e+06
1154	16.9954	Procyanidin P4, isotope	Procyanidins and flavan-3-ols	0.756214	0.598342	-0.286067	0.21278	-0.492693	3.18959e+06	6.2008e+06	4.60943e+06	4.80344e+06	4.06954e+06	5.75521e+06	2.71285e+06	2.55708e+06	2.65023e+06	446741	501812	498360	1.74533e+06	2.1503e+06	2.55798e+06	1.96349e+06	1.48251e+06	1.02661e+06	2.78538e+06	2.93844e+06	2.40797e+06	1.34078e+06	1.30989e+06	1.7036e+06	2.77177e+06	2.42399e+06	1.69606e+06	2.09559e+06	2.06854e+06	1.72099e+06
1154.01	13.311	Procyanidin P4, isotope	Procyanidins and flavan-3-ols	0.676497	0.379389	0.0284637	0.16338	0.187032	426084	325450	459295	758992	127399	490708	253245	26918.6	-	182750	-	-	161395	441293	52168.7	191673	-	487106	680429	244671	323864	90555.9	128587	259330	422723	668064	534983	1.68604e+06	88210.6	235781
1154.04	14.7382	Procyanidin P4, isotope	Procyanidins and flavan-3-ols	0.65681	0.660648	-0.110589	0.176079	-0.245438	1.89347e+06	1.49772e+06	2.19801e+06	1.55172e+06	714936	1.46998e+06	831440	1.44895e+06	640159	186173	198077	368656	345440	434482	204347	93124.5	381744	1.14655e+06	642477	286594	595280	390866	1.39945e+06	505155	1.41589e+06	1.27547e+06	786904	607439	604653	753075
1154.99	14.5725	Procyanidin P4, isotope	Procyanidins and flavan-3-ols	0.570538	0.506989	-0.302871	0.313846	-0.471549	774983	2.622e+06	1.7206e+06	2.60193e+06	1.05878e+06	2.53088e+06	958117	222939	261959	96332.7	63292.4	44132.6	692984	519174	385382	593632	441152	523264	1.67541e+06	630641	1.03561e+06	426962	457474	304083	163931	1.21594e+06	302410	1.01547e+06	536020	419213
1155.95	14.413	Procyanidin P4, isotope	Procyanidins and flavan-3-ols	-0.0558863	0.470415	-0.252657	0.192291	-0.505571	574093	1.29988e+06	501073	1.56377e+06	1.01437e+06	564184	412995	138131	350749	210595	12092.6	-	222934	355457	76641.7	184256	282616	469513	338363	832859	107309	441346	238750	213334	526002	172787	83016.7	368086	250998	126731
504.846	21.1075	Quercetin (acetyl) O- hexoside	Flavonoids	-0.192407	0.219394	-0.560883	0.192724	0.513132	4.34698e+06	4.56113e+06	2.63407e+06	6.54402e+06	3.65428e+06	3.14037e+06	104685	613440	218060	292614	748913	674972	5.28182e+06	3.19049e+06	4.88707e+06	9.82955e+06	5.01351e+06	1.05539e+07	1.644e+06	1.36313e+06	998770	1.78613e+06	5.21373e+06	2.94694e+06	3.43881e+06	4.87794e+06	5.25653e+06	7.83417e+06	1.02833e+07	7.82402e+06
608.869	19.2946	Quercetin - O- rutinoside	Flavonoids	0.218979	0.616	0.552952	-0.321292	-0.11386	2.76009e+06	2.53542e+06	2.75597e+06	3.13986e+06	3.47045e+06	2.9718e+06	4.73704e+06	4.34684e+06	4.05124e+06	2.6214e+06	2.94152e+06	2.76576e+06	186520	164279	200087	241511	174937	259046	928908	972555	1.09221e+06	1.13729e+06	1.2934e+06	1.58118e+06	2.37498e+06	2.84152e+06	1.17557e+06	3.91924e+06	3.5594e+06	3.77806e+06
462.84	19.9427	Quercetin 3-O-glucoside	Flavonoids	-0.119687	0.17818	0.388351	-0.478488	0.0853284	1.25676e+07	1.18719e+07	8.58734e+06	1.37533e+07	1.27227e+07	1.21357e+07	1.49799e+07	1.79361e+07	2.14058e+07	1.74719e+07	2.3184e+07	1.95974e+07	7.67107e+06	7.22366e+06	5.69118e+06	1.69928e+07	9.05316e+06	1.73869e+07	6.99128e+06	6.8758e+06	5.75857e+06	9.54657e+06	1.58886e+07	1.50563e+07	7.50103e+06	1.15569e+07	7.92823e+06	2.15082e+07	2.15029e+07	1.84389e+07
432.92	19.2259	Rosmarinic acid derivative	Hydroxycinnamic acid and derivatives	0.193986	-0.252014	-0.214125	-0.269198	-0.156835	767485	250865	717201	880209	1.32139e+06	916788	774626	1.45183e+06	604482	1.70993e+06	529288	460027	1.11311e+06	590167	1.07947e+06	952990	1.35815e+06	1.08575e+06	779184	1.11195e+06	985980	623468	426868	379018	341732	733403	648782	446469	419134	573687
404.897	20.7596	Sinapic acid derivative	Hydroxycinnamic acid and derivatives	-0.228557	-0.490206	-0.122087	0.295595	-0.00102456	695516	864976	704859	460790	865779	410906	512167	420389	1.00949e+06	608908	449853	1.06946e+06	491068	1.35379e+06	822319	1.1639e+06	1.89963e+06	737689	952728	1.4537e+06	1.01799e+06	1.62977e+06	1.16319e+06	921892	822534	739855	418991	762714	1.06747e+06	414315
364.89	5.76743	Tryptophan hexose	Aminoacid derivatives	-0.481342	-0.728885	0.0480423	-0.196579	0.200766	5.71942e+06	5.67611e+06	5.20017e+06	7.81513e+06	6.58552e+06	7.12416e+06	1.24521e+07	1.0465e+07	9.97618e+06	1.32649e+07	1.13806e+07	1.1137e+07	1.4716e+07	1.44081e+07	1.80237e+07	7.41408e+06	1.05117e+07	1.18897e+07	1.20326e+07	1.21922e+07	8.56901e+06	1.19617e+07	1.08653e+07	1.09718e+07	8.54004e+06	7.58034e+06	6.95972e+06	9.34909e+06	1.13084e+07	1.33905e+07
365.876	5.72149	Tryptophan hexose, isotope	Aminoacid derivatives	-0.272738	-0.449322	-0.00740718	-0.197957	0.153921	383191	893408	912877	1.01503e+06	959967	234845	1.49508e+06	1.30992e+06	1.53777e+06	1.54886e+06	2.10816e+06	549950	2.02916e+06	1.91137e+06	3.4648e+06	848068	597961	837630	1.38037e+06	730269	834754	1.91884e+06	2.20821e+06	798970	1.58486e+06	579131	1.27591e+06	622800	1.29567e+06	1.79195e+06
460.896	18.9859								2.93182e+06	1.90975e+06	2.51298e+06	4.62124e+06	3.00121e+06	4.89486e+06	2.15469e+06	1.97356e+06	1.5191e+06	1.82214e+06	2.0365e+06	2.16677e+06	986864	480408	1.29668e+06	1.01408e+06	963251	1.48531e+06	1.22406e+06	1.25435e+06	1.96275e+06	1.33197e+06	1.57667e+06	1.84401e+06	3.07836e+06	3.05093e+06	2.60309e+06	3.83987e+06	4.56581e+06	3.86205e+06
470.902	18.9715								3.90472e+06	3.29635e+06	4.03093e+06	7.1745e+06	6.54915e+06	5.76955e+06	2.62872e+06	1.62716e+06	2.07997e+06	2.61844e+06	2.87646e+06	2.71499e+06	1.7592e+06	1.32891e+06	1.62936e+06	1.8207e+06	1.58553e+06	2.07367e+06	2.77269e+06	2.22394e+06	2.07289e+06	2.54503e+06	2.25956e+06	2.91737e+06	4.01604e+06	4.7056e+06	3.14096e+06	6.74855e+06	6.21087e+06	6.05631e+06
180.739	4.01223								3.30509e+07	3.48728e+07	3.05712e+07	3.95651e+07	4.31739e+07	4.26049e+07	2.37555e+07	2.66406e+07	2.76191e+07	3.56474e+07	3.97354e+07	3.40096e+07	4.02437e+07	3.58363e+07	4.02105e+07	5.81439e+07	6.25329e+07	5.09291e+07	2.07385e+07	8.39055e+06	2.1344e+07	2.86773e+07	3.46965e+07	3.3993e+07	1.74709e+07	1.73909e+07	1.46287e+07	2.60336e+07	2.62181e+07	2.74165e+07
204.718	4.13703								1.77661e+07	7.50327e+06	1.52035e+07	2.39219e+07	2.07233e+07	1.86002e+07	1.2372e+07	8.21755e+06	8.12684e+06	1.15099e+07	1.16001e+07	1.21449e+07	1.36749e+07	1.01729e+07	1.29962e+07	1.55112e+07	1.66907e+07	1.47603e+07	1.00442e+07	1.08108e+07	1.05939e+07	6.05122e+06	1.18594e+07	8.90445e+06	3.15033e+06	3.11857e+06	3.27104e+06	1.90296e+06	3.12372e+06	1.18775e+06
358.859	11.4616								8.2272e+06	7.45485e+06	7.83142e+06	6.23629e+06	5.0538e+06	5.2925e+06	1.43229e+06	1.53656e+06	781803	816918	822136	909181	4.03518e+06	4.0432e+06	2.94972e+06	2.15111e+06	2.83932e+06	2.92753e+06	3.81075e+06	3.2045e+06	3.55512e+06	2.82704e+06	2.3174e+06	1.84189e+06	1.09165e+06	918368	626783	666994	1.13585e+06	1.97377e+06
420.954	25.6629								6.24887e+06	249026	2.41118e+06	5.26863e+06	1.08045e+06	1.83413e+06	813969	67108.6	3.46357e+06	3.23648e+06	4.33882e+06	1.66888e+06	180829	667817	3.33834e+06	131559	653010	1.21373e+06	1.19628e+06	1.49332e+06	914508	268055	582023	97528	2.43859e+06	1.27201e+06	2.24912e+06	175087	236875	659204
424.875	19.0043								8.32313e+06	8.68206e+06	6.83833e+06	1.23894e+07	1.22609e+07	1.41908e+07	6.30031e+06	5.62838e+06	4.67714e+06	4.78025e+06	4.5131e+06	5.32485e+06	3.00515e+06	4.22078e+06	4.14928e+06	3.98925e+06	5.00583e+06	3.71387e+06	4.14763e+06	4.22134e+06	2.83512e+06	4.74584e+06	4.80087e+06	5.19451e+06	6.86436e+06	5.97893e+06	6.21007e+06	1.37673e+07	1.0181e+07	1.32411e+07
485.108	31.7091								7.42116e+06	3.35783e+06	4.38076e+06	4.44306e+06	5.81272e+06	3.42774e+06	7.21224e+06	7.77068e+06	5.96914e+06	1.52568e+07	1.92057e+07	1.5758e+07	2.06853e+06	1.97911e+06	1.52847e+06	2.13112e+06	3.31149e+06	1.65065e+06	2.00419e+06	2.11482e+06	814778	2.4115e+06	2.81312e+06	2.55504e+06	2.652e+06	2.4011e+06	3.30924e+06	4.90127e+06	3.42925e+06	2.79376e+06
487.126	29.7931								7.2182e+06	3.76313e+06	3.08815e+06	7.17837e+06	6.11369e+06	3.96737e+06	1.30274e+07	9.7943e+06	1.33701e+07	1.82831e+07	1.8306e+07	1.58047e+07	4.18025e+06	6.56234e+06	4.49367e+06	2.44037e+06	4.44322e+06	4.2545e+06	2.09048e+06	4.07086e+06	2.58491e+06	4.08022e+06	5.19571e+06	7.08151e+06	4.09722e+06	4.14113e+06	3.9006e+06	4.43485e+06	4.06202e+06	3.46197e+06
148.733	23.8917								686201	827473	545244	387222	407906	611460	392029	317959	205332	153063	288626	145835	269950	317573	203596	79263.3	63205.4	150778	913460	1.2279e+06	835925	476202	478337	961708	78253.9	99523	146483	170125	69991	158909
152.775	24.0802								488444	716751	228208	612633	579962	581700	845114	640715	758367	657217	695544	554189	289480	463477	636323	308903	251109	481624	1.34748e+06	908391	982026	356866	562259	794529	1.13489e+06	1.20551e+06	1.63252e+06	943502	1.47748e+06	1.14656e+06
160.71	4.46284								326077	348073	741777	515708	460947	62605.1	-	475743	250677	134836	534272	153582	577267	259977	297244	244606	127214	1.01125e+06	102550	588053	494459	473244	639888	301214	242379	635083	83080.1	792871	438830	784967
180.741	6.0552								2.77829e+06	1.62344e+06	1.77539e+06	2.39008e+06	3.61244e+06	1.57465e+06	1.10649e+06	1.43949e+06	4.24054e+06	3.26974e+06	3.67574e+06	867833	848802	986344	1.33586e+06	6.76302e+06	6.87703e+06	4.37701e+06	1.37004e+06	683445	1.11894e+06	3.61081e+06	4.11255e+06	1.99164e+06	717060	2.10288e+06	777443	2.76221e+06	3.45182e+06	3.61121e+06
180.743	6.61615								740728	767626	656021	1.08889e+06	2.30411e+06	1.78304e+06	3.24261e+06	1.14674e+06	1.27235e+06	578744	2.23719e+06	3.926e+06	1.20492e+06	2.74412e+06	1.26447e+06	5.06343e+06	4.79694e+06	4.25314e+06	1.09922e+06	2.09792e+06	1.79307e+06	2.1514e+06	2.89539e+06	1.09388e+06	832217	1.45366e+06	2.0296e+06	1.53315e+06	2.21971e+06	2.26158e+06
181.751	4.62898								780116	696539	521023	985499	714125	215325	218327	265810	359715	62729.9	433099	448136	519716	331581	805686	852883	1.48357e+06	417533	720243	121743	313191	503888	435573	409494	140501	589886	382254	514697	497615	267722
186.668	4.18542								1.21855e+06	1.78665e+06	688280	1.50499e+06	879667	1.2682e+06	746202	401067	220909	299488	370049	295614	646449	715408	1.85537e+06	875107	536514	631855	1.05182e+06	209307	1.82809e+06	1.06638e+06	1.02422e+06	769443	242114	606405	247680	321611	-	-
190.694	5.05986								1.03308e+06	927603	640301	890190	1.05451e+06	431570	699402	225543	760329	485026	507157	560756	678756	644089	896394	128386	173836	263428	654106	362128	469833	680248	779837	567493	1.61205e+07	1.21039e+07	1.39462e+07	1.38955e+07	1.37391e+07	1.41878e+07
190.695	4.27377								2.64171e+06	3.61135e+06	2.44723e+06	899637	1.59903e+06	983343	2.02521e+06	1.90185e+06	1.71451e+06	1.68693e+06	1.53036e+06	1.92309e+06	1.93867e+06	1.20729e+06	1.64387e+06	368782	1.6075e+06	905389	1.24373e+06	1.06501e+06	398804	1.8751e+06	664206	2.59752e+06	4.38449e+07	3.64243e+07	3.5616e+07	3.57608e+07	3.28163e+07	3.53977e+07
190.715	15.0949								1.77838e+06	2.095e+06	1.62598e+06	646117	732542	853424	960768	1.33814e+06	634249	819413	641757	675427	1.17694e+06	1.06029e+06	840510	534362	841787	801053	679870	961131	256918	899571	568366	753437	1.3547e+06	1.31382e+06	1.75278e+06	1.73569e+06	505815	694312
190.723	13.1341								5.20215e+06	5.30851e+06	7.46809e+06	6.05471e+06	6.34043e+06	7.8836e+06	6.53002e+06	7.6059e+06	8.95437e+06	6.6971e+06	4.48156e+06	5.30715e+06	3.85698e+06	4.81476e+06	4.31003e+06	3.77995e+06	1.94401e+06	4.31356e+06	4.28045e+06	5.51929e+06	7.38815e+06	4.01563e+06	5.39113e+06	3.69892e+06	9.31571e+06	6.90623e+06	6.48606e+06	7.95875e+06	6.28171e+06	7.66245e+06
193.757	30.6341								770143	601187	531720	853317	555822	679464	891103	349759	699228	732588	930671	698354	503739	722964	415253	590868	565119	543613	730452	418336	327054	750563	736198	700578	441250	709945	614741	709314	554432	1.00624e+06
204.771	20.8496								856602	759242	1.13652e+06	664840	831427	879311	617482	521116	825590	921876	547088	890440	517477	1.39341e+06	1.12112e+06	1.21755e+06	3.47933e+06	1.1834e+06	1.87444e+06	2.17834e+06	1.57417e+06	2.39606e+06	2.1968e+06	2.27524e+06	487684	240924	715745	963000	662018	927808
206.71	11.3993								287433	143173	330972	600761	491854	692182	65433.8	179805	248122	240808	117625	319044	154703	82598.9	28060.9	108801	126008	80613.2	593485	432359	240986	605189	309718	313041	3.2839e+06	3.321e+06	1.89193e+06	4.54398e+06	4.66803e+06	4.82191e+06
206.731	13.8755								300905	134691	176676	418751	567055	353793	1.22251e+06	1.00529e+06	1.22414e+06	1.98806e+06	791775	1.32143e+06	719507	776629	697432	254757	203363	395741	229651	172811	278629	130002	273650	147290	560739	737821	491596	688681	313501	244261
214.707	4.22199								755030	678326	348270	209395	54173.7	718844	310100	212674	54110.3	806377	656775	652638	622001	392815	694088	259134	206084	141710	90636.7	90714.6	692921	986288	122435	915149	39546.8	401817	424651	58654.3	733207	735007
216.704	4.17862								322709	822029	497789	903466	748248	961628	951767	344348	449813	934448	738037	256936	628658	327427	317840	185656	517276	737289	-	392482	232991	-	-	771437	542148	147712	120670	361628	725962	297011
262.848	24.0472								515457	527826	483573	675453	1.33594e+06	862283	869740	906892	763388	812966	649371	639436	411380	134158	557483	316858	479168	189670	992428	960694	1.38441e+06	775108	892901	737891	938229	1.8675e+06	1.46835e+06	949930	1.10119e+06	1.05492e+06
265.818	30.9214								400263	403406	856859	363861	687158	622588	935193	568132	842260	449584	510113	746914	422132	401884	633602	710946	170732	553100	599407	359450	695973	711876	425278	453810	349135	684214	299631	476396	440005	329317
278.783	4.41615								554564	435300	552657	976400	425798	383708	547078	81888.5	455623	173819	700334	195761	268011	416408	533984	613260	594987	603807	-	395537	364033	600653	172872	-	154456	358043	48788.1	54344.5	525374	354047
282.773	13.3026								1.08481e+06	150857	155285	1.20942e+06	224169	794675	332087	382140	305522	637382	859081	440425	2.13104e+06	190585	106474	160034	360845	535382	348028	495975	215110	579327	177374	219355	51010.1	-	434105	13189	77595.1	402526
292.876	11.604								69740	378509	513642	363263	340092	410335	196657	325361	182297	246325	380830	310418	208332	522556	323465	303943	137851	271059	210081	100528	210361	53358.7	50569.9	566622	1.45936e+06	1.69006e+06	721717	1.24286e+06	797747	1.06447e+06
294.825	5.37489								141321	184417	107264	98295.9	99819.2	266905	80407	28620.6	208799	134625	46424.3	36166	216796	79394.3	33286.5	47698.5	-	-	281681	198355	-	30463.4	63985.6	161794	367666	329234	252192	347835	654986	323276
298.832	11.4428								258840	169904	115956	887854	421540	300488	400171	345450	196486	326735	217488	247166	74034	29603.4	56403.8	98655.3	68015.6	32362.2	608358	779492	658946	716167	628826	293275	5.49972e+06	5.58401e+06	4.49466e+06	7.11935e+06	7.66657e+06	7.45274e+06
328.832	13.3381								860666	725354	904297	903344	116918	904929	768352	122479	340194	1.18595e+06	532559	2.69582e+06	1.59751e+06	289827	482976	421232	72157.2	662004	719890	527585	1.02014e+06	1.18464e+06	80801.2	811963	947913	227049	142326	9026.69	179644	271300
336.871	6.80218								392852	82450.6	171911	164135	68841.5	117922	115861	65139.9	36547.8	232344	46604	21478.8	1.04068e+06	1.35395e+06	704103	1.29377e+06	965579	1.08138e+06	449652	178168	109591	584138	184216	301470	330084	424634	91651.3	204573	48879.5	307268
336.883	10.295								1.45798e+06	2.00195e+06	964871	2.38894e+06	1.32376e+06	1.44591e+06	551174	719040	596189	711134	833532	738366	1.18793e+07	1.26718e+07	1.11388e+07	1.47281e+07	1.34535e+07	9.4998e+06	3.42209e+06	4.03496e+06	4.07135e+06	4.01833e+06	3.43312e+06	2.92426e+06	2.23722e+06	1.54593e+06	1.72834e+06	964044	1.26244e+06	1.86052e+06
338.862	11.285								191750	55020.9	70695.9	548179	55861	159069	45694.8	143472	75570	75794.2	131600	100342	160535	67240.1	95377.7	136741	46190.2	85872.1	177345	85296.9	106741	172749	277562	112776	1.1919e+06	972166	881322	1.2738e+06	1.08615e+06	1.44663e+06
341.856	4.58086								268492	424458	516873	771973	1.18762e+06	1.59134e+06	1.36463e+06	1.11504e+06	2.56409e+06	869510	3.41077e+06	2.03694e+06	378634	716222	955028	997516	651062	810788	3.8972e+06	960827	3.40806e+06	3.26416e+06	3.51675e+06	1.87944e+06	1.48774e+06	809082	1.2419e+06	1.18796e+06	447640	1.19617e+06
341.871	4.10043								1.20685e+06	872195	1.30999e+06	785890	2.17376e+06	3.33778e+06	5.53988e+06	5.34356e+06	6.86496e+06	5.08869e+06	1.45041e+06	6.25412e+06	1.38095e+06	1.68387e+06	3.21831e+06	989772	1.93239e+06	3.25787e+06	1.04368e+07	4.77472e+06	8.6824e+06	7.76082e+06	4.25969e+06	8.73138e+06	407422	2.40876e+06	3.39435e+06	3.31847e+06	2.06655e+06	3.25369e+06
342.874	4.06681								590002	2.13359e+06	1.648e+06	2.69555e+06	3.77003e+06	2.84201e+06	2.06534e+06	1.35248e+06	686103	924924	3.95768e+06	3.59834e+06	1.94403e+06	1.56005e+06	2.22131e+06	4.67185e+06	3.00752e+06	3.45739e+06	1.46932e+06	2.43736e+06	656090	899492	1.52965e+06	1.94836e+06	612890	544820	1.1924e+06	1.71614e+06	1.7454e+06	2.86549e+06
342.905	19.1333								46976.2	140092	65034.1	112992	91479.4	296509	263190	301630	313226	861353	225495	239102	39468.5	71192.3	64746.2	88608	53034.8	102601	188946	63490	66737.2	123970	54650.3	78685.2	1.98949e+06	1.55879e+06	1.85596e+06	1.11549e+06	256562	964828
344.915	18.9893								220449	309248	310588	844565	377396	502688	476557	515984	346198	134596	153286	419418	105939	320894	224747	328737	160495	188633	607717	421540	246571	472443	322545	353687	1.07375e+06	669040	549195	924884	496046	737914
345.852	4.79714								149052	356505	528996	45931.4	-	47013	44028.9	-	111459	88540.5	111298	212118	446935	653904	212363	1.04284e+06	583236	889603	-	143148	442406	280552	704555	656989	84134.1	-	42813.5	192207	-	76171.6
349.941	18.9389								279851	378691	85036.5	516781	243681	327755	50129	84857.6	327584	89790.2	98242.9	91800	119562	141533	41879.3	88391.4	151263	61731.3	333447	366549	446077	210344	213118	432591	146170	365781	206170	258750	311213	531303
350.949	12.8666								570243	817476	300827	634235	832741	758626	365240	396071	153622	659068	597644	187149	825720	856559	1.27999e+06	1.35179e+06	1.88581e+06	1.19608e+06	509118	217743	275377	925351	573231	756921	61868.7	323547	212933	91328.5	187331	236028
352.887	24.0705								4.00296e+06	4.43157e+06	5.53465e+06	3.71568e+06	2.46648e+06	3.13852e+06	2.55316e+06	1.66075e+06	2.47815e+06	1.68917e+06	1.36436e+06	1.54429e+06	1.58283e+06	1.56797e+06	1.53513e+06	1.18434e+06	748390	1.44693e+06	1.07007e+07	1.28788e+07	1.02428e+07	6.84744e+06	5.76004e+06	5.02256e+06	1.1473e+06	500848	864909	1.73495e+06	1.10084e+06	1.11362e+06
352.921	19.3045								282380	917372	410218	1.59894e+06	406386	593251	3.10155e+06	2.67773e+06	3.78263e+06	4.19651e+06	4.13376e+06	3.98906e+06	82140.1	93566.9	491020	173560	212362	73957.6	555477	352322	860214	365312	290501	505055	1.52209e+07	1.32878e+07	1.64503e+07	1.04366e+07	6.05618e+06	9.99352e+06
358.855	7.38624								548603	450535	490403	718675	205703	480706	402259	477975	477298	809332	366899	500110	750478	543602	760065	640159	1.41951e+06	295899	1.38723e+06	1.14347e+06	1.22846e+06	854173	905084	676396	923600	812982	571607	542717	877696	1.05618e+06
358.858	6.69016								963837	1.7786e+06	730209	1.66815e+06	777196	1.19925e+06	3.66252e+06	4.15412e+06	2.02913e+06	304708	1.22099e+06	774128	2.2379e+06	1.18914e+06	2.89442e+06	1.0648e+06	1.89942e+06	1.93749e+06	5.45244e+06	6.86633e+06	5.6523e+06	4.63548e+06	4.18642e+06	2.78567e+06	2.80247e+06	2.83323e+06	2.2318e+06	2.92863e+06	2.19508e+06	2.7675e+06
358.901	18.4457								2.63436e+06	2.25542e+06	2.12543e+06	2.65598e+06	3.09837e+06	2.53598e+06	990393	1.40623e+06	1.3104e+06	1.48254e+06	1.24583e+06	1.79578e+06	688718	767093	803604	646556	1.01124e+06	1.21757e+06	1.59343e+06	1.43681e+06	1.27939e+06	537788	934515	580645	1.54877e+06	1.46315e+06	1.2949e+06	1.47168e+06	2.18906e+06	1.66057e+06
362.842	13.0154								295850	309245	937628	2.58469e+06	1.22663e+06	443201	333588	109669	51127.4	712778	262207	319606	1.07155e+06	426029	616457	144987	292715	821557	656918	450293	436315	314844	510061	703910	230757	62835	298392	305882	343801	1.09135e+06
362.913	19.2102								738887	898124	997885	880954	991795	1.15192e+06	658790	714659	828482	881958	1.52938e+06	1.45392e+06	324316	106792	273188	330147	552737	535825	1.0664e+06	576784	595586	885419	1.8121e+06	813297	433294	415483	397631	958918	734688	723441
364.806	15.5032								739689	736895	912671	442590	553666	1.27289e+06	476096	566969	723049	306781	415432	197589	361285	130585	235148	677812	498847	551574	963598	349637	148558	534232	403470	520107	234833	330849	885107	1.10269e+06	701503	474103
366.839	4.66397								138340	70525.6	52662.1	124086	287199	158507	190335	-	109412	1.12244e+06	-	184762	62626.4	877182	264805	393683	147948	387676	172234	62731.2	-	613466	42243.8	-	241733	103897	281853	175486	57712.5	-
366.877	20.8379								2.17304e+06	2.16125e+06	3.478e+06	3.14585e+06	2.71803e+06	3.02326e+06	3.01779e+06	2.8497e+06	3.28393e+06	3.28784e+06	2.72402e+06	3.00564e+06	2.75969e+06	3.09413e+06	3.90623e+06	4.40096e+06	7.48785e+06	5.59919e+06	6.81934e+06	6.11131e+06	6.10521e+06	7.28943e+06	7.49423e+06	9.01996e+06	2.21539e+06	2.1762e+06	1.8031e+06	3.51206e+06	3.26377e+06	2.75341e+06
368.835	14.1205								6.05401e+06	5.20133e+06	6.79645e+06	4.76052e+06	4.53349e+06	4.08106e+06	616545	448907	1.07078e+06	440494	1.28812e+06	1.11338e+06	78477.4	34335.4	99469.6	-	112594	11969.9	9.74239e+06	9.23287e+06	7.82229e+06	6.97803e+06	7.65664e+06	6.78339e+06	708565	465218	353644	489344	297783	525340
370.83	4.17445								2.87765e+06	2.31298e+06	1.93585e+06	3.28089e+06	2.97807e+06	2.45227e+06	4.37746e+06	2.38983e+06	2.31486e+06	2.21542e+06	822142	2.69552e+06	629379	667354	828486	2.48524e+06	1.30744e+06	1.33062e+06	505074	490796	886189	2.04723e+06	1.25513e+06	2.49999e+06	543447	599553	442865	906838	538475	1.55112e+06
370.843	4.52991								1.55515e+06	1.37556e+06	830857	1.57618e+06	1.77201e+06	1.00935e+06	1.0373e+06	844074	2.07229e+06	511495	1.05457e+06	1.13963e+06	300816	933719	588595	1.17529e+06	1.0638e+06	1.09053e+06	167766	82819	147532	447122	1.26107e+06	-	367648	159633	653397	439389	44449.1	436504
372.848	10.7812								430407	887733	904356	824693	562590	570792	1.01733e+06	907163	658997	370013	534495	376993	719511	564016	623797	139214	617114	400426	106055	129751	377207	157188	228495	137235	1.79132e+06	909349	1.36254e+06	1.03287e+06	712885	622511
374.818	15.1864								263333	487606	286054	294616	231718	609192	113379	459134	386084	705849	337888	362772	297676	174647	345392	392948	410187	618912	465134	420188	398548	836844	364301	365685	719628	386389	702332	417403	672512	430065
376.825	5.4465								588746	903990	1.04093e+06	1.37956e+06	1.08296e+06	1.61616e+06	1.3055e+06	1.9886e+06	2.64018e+06	1.37682e+06	1.53356e+06	1.14049e+06	757737	969532	1.00693e+06	1.25222e+06	1.3691e+06	506876	4.51231e+06	2.53601e+06	1.88501e+06	3.37214e+06	3.67496e+06	1.0687e+06	945670	388140	702053	591166	1.08166e+06	1.00141e+06
376.828	6.33966								540889	208590	341436	440330	413579	336791	537826	668610	740513	380455	206931	163975	413764	279376	357601	257413	518424	269786	1.28482e+06	306360	503296	649553	709787	835389	311743	402327	338280	516788	219739	224605
376.83	4.38393								5.10989e+06	5.52435e+06	6.09162e+06	7.35782e+06	4.83876e+06	7.07369e+06	7.7851e+06	1.11872e+07	1.24246e+07	6.25204e+06	1.37203e+07	1.42222e+07	5.64968e+06	4.54437e+06	1.12093e+07	7.77894e+06	8.03033e+06	1.02809e+07	1.12436e+07	1.04742e+07	1.11616e+07	1.3211e+07	7.56152e+06	1.42284e+07	4.3025e+06	3.50426e+06	4.32297e+06	4.15597e+06	6.44356e+06	2.77958e+06
376.862	14.6443								406219	225830	294503	537611	856916	711280	579372	174508	182451	854023	576356	206926	142338	126583	99873.4	89113.8	584740	678957	847813	234183	210336	500690	438314	484811	398071	103191	299156	463994	218705	104496
376.933	18.3939								831663	740996	817370	1.10719e+06	871897	1.26242e+06	911910	854035	1.13379e+06	1.29058e+06	634090	1.41625e+06	1.07371e+06	1.27544e+06	981687	735692	953568	697052	1.84354e+06	1.58564e+06	1.37464e+06	1.31639e+06	956954	1.32577e+06	1.39973e+06	1.14655e+06	954455	1.31431e+06	1.15888e+06	1.28963e+06
377.825	4.85327								564787	216963	359384	348831	248374	110101	215090	565258	832716	456192	633024	696764	120656	154181	141058	335779	875971	229050	504892	502192	873306	460476	1.0159e+06	954503	430756	77829.5	337777	151013	334447	124001
377.853	4.35609								72517.9	514478	326718	406093	483259	791658	361893	1.13751e+06	1.07296e+06	920371	402500	2.4186e+06	744767	96658.9	587966	580161	525727	894948	636892	1.89966e+06	1.50007e+06	1.45837e+06	726558	1.53534e+06	135780	248357	538716	544266	-	564536
378.828	4.34403								3.04097e+06	4.35667e+06	2.46385e+06	1.16212e+06	1.16847e+06	2.04902e+06	5.02959e+06	6.47974e+06	2.41544e+06	3.90395e+06	4.00597e+06	3.92345e+06	2.95577e+06	3.6206e+06	1.40802e+06	2.15221e+06	4.00368e+06	3.54625e+06	2.79562e+06	4.59138e+06	1.47496e+06	2.02213e+06	9.53837e+06	4.51924e+06	1.83957e+06	1.47829e+06	1.08369e+06	1.91297e+06	1.79743e+06	2.0391e+06
378.839	4.89857								316380	1.07026e+06	410984	1.19576e+06	258987	702463	1.31311e+06	1.71061e+06	2.09867e+06	1.82084e+06	1.66324e+06	1.46835e+06	739368	343426	713826	482068	1.3521e+06	523597	2.53043e+06	1.50321e+06	861814	438122	2.54401e+06	1.05978e+06	597561	422200	748404	770667	386394	389329
378.871	13.2297								648763	94460.2	77686.7	114012	85061.2	53087.4	88113.7	613261	113620	137500	303475	74418.9	199361	89265.1	115228	85539.2	234324	189056	152707	54878.5	99286.8	649960	95039.7	444945	60886.2	501583	132283	202301	208320	652544
379.847	4.53272								368882	69005.9	92857.7	509875	60735.1	194198	547314	525142	584781	312250	489921	674032	353857	83976.9	1.34087e+06	167007	160463	44704.4	1.02565e+06	486722	945982	169361	522019	-	351122	201322	245901	78561	183039	122516
380.862	4.37764								175223	334047	233004	203212	245909	20560.3	365873	-	132392	320893	-	174167	167267	310497	301501	-	150562	561349	1.23439e+06	482476	107524	331814	144544	-	-	159085	58518.6	188617	-	62482.6
384.806	4.75216								89951.1	186162	50045.5	168942	480675	677817	94935.7	55942.3	100105	433449	142479	40617	191649	13027.1	59404.5	44833.7	36157.2	142204	-	-	190345	-	-	-	569173	663210	393197	568295	413005	574823
386.84	5.579								1.06364e+06	698267	855093	1.35295e+06	1.2483e+06	1.20698e+06	1.30474e+06	5.38907e+06	1.51453e+06	3.38331e+06	5.12935e+06	2.97903e+06	711622	296189	912718	2.02279e+06	3.28603e+06	1.23916e+06	5.10353e+06	7.64627e+06	7.25564e+06	3.58948e+06	5.00253e+06	6.6575e+06	1.54486e+06	1.66284e+06	1.5619e+06	2.38274e+06	1.36159e+06	2.97545e+06
386.85	13.8775								745704	740857	638043	1.01496e+06	354137	1.32191e+06	3.14144e+06	3.23985e+06	4.16191e+06	4.89781e+06	3.38016e+06	3.21833e+06	1.5836e+06	2.34763e+06	1.01317e+06	747986	631854	1.31701e+06	1.22855e+06	749900	577483	531821	1.55243e+06	805547	1.08399e+06	2.08461e+06	1.65648e+06	1.37882e+06	1.89657e+06	2.0083e+06
386.864	12.6725								1.52894e+06	1.38214e+06	685568	1.22029e+06	678174	1.04499e+06	1.00993e+06	1.11787e+06	1.06983e+06	1.21857e+06	1.36577e+06	453758	141074	232642	342934	209180	865747	156599	599361	937928	773776	531821	1.00498e+06	974232	603690	650551	1.49303e+06	769129	1.76109e+06	575369
387.831	4.69751								501274	416755	802029	892491	1.21211e+06	1.05209e+06	2.79107e+06	2.31609e+06	4.38758e+06	2.81574e+06	3.54721e+06	2.54582e+06	1.04198e+06	717469	876285	1.10515e+06	2.45759e+06	884680	6.43337e+06	3.44027e+06	4.9134e+06	3.01283e+06	5.78815e+06	4.5094e+06	1.47074e+06	686732	765686	1.97966e+06	2.06142e+06	1.8556e+06
387.835	4.21874								1.82323e+06	1.81282e+06	2.62346e+06	2.45346e+06	1.80076e+06	2.05199e+06	7.07351e+06	1.04391e+07	1.05301e+07	1.17326e+07	1.24825e+07	7.84468e+06	4.02445e+06	1.90248e+06	2.65245e+06	3.40711e+06	5.55893e+06	6.04935e+06	1.49245e+07	8.49625e+06	1.33353e+07	1.43083e+07	4.95881e+06	1.43369e+07	4.06042e+06	2.46214e+06	3.68357e+06	6.37603e+06	3.45822e+06	5.59597e+06
388.822	4.05389								812184	942235	640614	965457	1.01629e+06	1.25832e+06	1.89287e+06	2.47457e+06	1.81412e+06	2.32225e+06	1.51795e+06	1.25173e+06	756941	1.12632e+06	1.07564e+06	838396	2.37007e+06	1.24895e+06	1.34831e+06	1.95312e+06	1.54531e+06	1.62832e+06	1.55838e+06	1.06181e+06	703701	815466	1.19946e+06	354183	785765	1.43091e+06
388.825	4.86289								438698	328870	485399	253014	532170	428625	691050	599295	-	952262	796679	640897	556524	9780.24	408635	340294	1.31712e+06	519800	840657	1.03443e+06	559458	2.03676e+06	414295	1.40706e+06	416976	130989	366173	697892	664335	363142
390.775	15.088								514105	173781	628410	373863	276455	394773	354434	97634.7	205733	311912	442161	757761	531689	175311	289198	143999	159826	356359	595588	307031	354365	305118	338304	208052	605282	172874	803233	176650	522116	494574
390.806	4.30697								21730	77396.6	-	136035	41393.9	-	-	223848	-	81657.5	1.00363e+06	409769	403442	-	-	267342	-	271401	438932	76392	595096	-	-	-	2.34133e+06	3.4233e+06	2.07189e+06	6.95336e+06	2.09961e+06	4.61772e+06
390.881	12.5384								1.61895e+06	1.8602e+06	3.85059e+06	1.67323e+06	938309	2.0578e+06	6.06449e+06	5.61221e+06	6.46821e+06	5.8596e+06	5.77448e+06	5.01702e+06	3.71016e+06	4.5869e+06	3.97398e+06	1.36718e+06	2.39377e+06	2.52856e+06	2.64198e+06	3.63815e+06	3.31289e+06	3.00537e+06	2.99898e+06	2.28786e+06	1.63752e+06	1.19758e+06	683253	2.48702e+06	1.81867e+06	2.30909e+06
392.826	15.1756								1.04439e+06	791095	928788	367320	222454	892410	813835	604037	922943	496150	528246	920753	160804	288889	376115	369710	428062	198809	609017	410586	258781	161273	551449	992597	140945	497678	153049	423715	366438	560099
394.892	13.1024								90938.1	129459	1.40465e+06	131488	178762	269108	81856.8	88999.1	229904	126753	363496	175694	314157	163885	274167	379781	75888.3	63490.5	389013	286467	362036	126522	257121	168641	285565	52655.8	267188	273933	343342	544130
400.826	5.58053								786029	736149	721818	687764	602834	846653	1.28848e+06	582668	487855	547817	1.56128e+06	725755	523762	419098	737874	1.01515e+06	584699	495581	277619	686005	644273	245404	277030	652274	258513	398620	262336	976172	415048	862034
400.84	4.75273								2.85206e+06	1.49652e+06	2.31433e+06	3.55737e+06	1.10593e+06	3.70241e+06	2.63574e+06	3.33277e+06	2.82694e+06	3.92353e+06	7.27856e+06	5.58403e+06	2.18455e+06	1.9313e+06	1.85953e+06	1.34841e+06	1.53393e+06	4.41551e+06	1.23625e+06	888980	601507	574626	1.30927e+06	1.73458e+06	478269	333148	602968	1.21856e+06	587147	1.1687e+06
400.851	12.4972								154583	567005	1.14294e+06	520474	256919	298746	153774	419662	498013	696697	999982	854692	1.31431e+06	1.01415e+06	1.23521e+06	1.53884e+06	1.74943e+06	1.00319e+06	180409	941731	1.22239e+06	569634	1.18036e+06	435159	764568	460037	890232	532835	961239	864038
402.864	20.8713								1.27513e+06	1.30349e+06	892391	1.77459e+06	1.57611e+06	855236	1.24441e+06	722030	1.38936e+06	1.72177e+06	901096	1.001e+06	1.18105e+06	1.24876e+06	1.62883e+06	2.07186e+06	2.53852e+06	2.08043e+06	3.14665e+06	2.17243e+06	2.29678e+06	3.69436e+06	2.86922e+06	2.54628e+06	767778	806038	751415	1.90411e+06	1.04674e+06	1.5546e+06
402.888	17.1332								672714	423314	725413	862152	1.07411e+06	1.42868e+06	539820	593214	594539	626304	388190	272545	684840	608474	783937	756935	896280	509795	1.94216e+06	1.64166e+06	1.64151e+06	1.08215e+06	1.25858e+06	824862	1.2181e+06	1.93442e+06	1.58181e+06	1.02233e+06	1.00882e+06	1.40113e+06
403.82	5.20996								64053.9	101491	92745.5	346036	271406	139341	576349	406021	698657	729992	742382	264742	182328	200994	582677	285054	300650	230487	559522	918664	423497	254385	365632	715200	262131	180178	50897.4	264198	19208.6	372095
403.835	4.51751								276729	747266	201542	299841	833928	397961	593074	1.01828e+06	801568	735379	1.54357e+06	676707	69318.1	402591	102986	399820	263958	577491	486822	1.14692e+06	153084	956873	75581.2	297914	675256	201906	152411	483255	307926	52094.4
404.769	4.95055								130427	204947	213165	186079	173593	144006	57467.4	96228.5	109859	206710	-	262816	59502.8	218611	126025	164098	407746	17086.9	168689	391884	132083	317795	134390	52325.5	771128	854007	826613	588020	756960	1.05717e+06
407.88	13.2231								412416	583815	140156	51794.4	1.43872e+06	68819	534549	173024	618897	771137	648041	1.32276e+06	834517	357057	321803	1.21936e+06	2.30874e+06	1.30878e+06	1.38266e+06	1.38091e+06	1.06233e+06	843859	1.33488e+06	1.14354e+06	151237	109284	68062.3	428471	55651.9	198053
408.779	4.08328								28323.1	485371	83541.8	252404	475911	-	145708	-	240391	408527	146599	193881	350826	63708.2	206455	844064	278411	140569	756775	-	-	-	-	108865	265628	563873	928417	294353	322643	-
408.843	13.247								288219	333352	302122	135608	1.64669e+06	581498	486178	78669.6	450732	265421	301200	218096	240749	110988	223272	522555	256901	429152	247321	340225	66127.9	229870	429376	113295	154886	40713.3	-	76393.6	470947	71307.3
410.796	4.39775								-	53981.4	-	-	334447	114209	96230.1	381279	212486	38163.4	828492	243143	-	119084	86260	448398	404562	153423	-	42951.2	-	203748	-	138386	279426	163148	-	611154	595304	184030
412.857	11.6808								81082.5	38531.5	205706	126585	515635	25022.5	130915	20442.1	194330	99022.3	98226.8	94926.2	781498	1.00189e+06	901712	749937	646063	860706	100435	189733	40998.2	141685	101342	220307	1.94613e+06	1.39368e+06	3.00364e+06	825286	1.29716e+06	1.69832e+06
412.889	12.8977								87173.2	145692	155858	302786	448629	95296	207031	176911	58839.9	333072	310318	133808	137339	110652	295055	364546	492343	438156	148674	151052	108821	131016	112086	246342	292265	404789	571657	253787	551908	1.25014e+06
412.903	20.847								3.57159e+06	3.99112e+06	4.36294e+06	4.88892e+06	4.46882e+06	5.17562e+06	5.36762e+06	4.16603e+06	3.43131e+06	6.30991e+06	4.96133e+06	5.56184e+06	6.01991e+06	6.15161e+06	6.41032e+06	7.04297e+06	8.70416e+06	6.71283e+06	1.0355e+07	9.91326e+06	8.6707e+06	1.05658e+07	1.12101e+07	9.90274e+06	2.18153e+06	4.16931e+06	3.4586e+06	6.62106e+06	5.98088e+06	4.50774e+06
415.144	13.1528								122964	1.20676e+06	248524	-	119047	199761	259946	60682.5	383789	240974	133051	67208.2	116249	216812	613887	79914.1	77257.8	138329	10989.8	275193	185040	240996	137427	116992	319743	146031	101462	214537	243559	203938
415.816	13.1567								1.71195e+06	1.94534e+06	1.90846e+06	3.6787e+06	2.32536e+06	2.10275e+06	1.75772e+06	1.16565e+06	1.94519e+06	1.54471e+06	658886	1.90117e+06	2.4337e+06	3.15543e+06	1.12346e+06	745253	866680	1.49679e+06	2.10418e+06	1.83727e+06	2.28862e+06	1.03436e+06	1.68322e+06	2.51714e+06	1.34993e+06	2.26531e+06	1.622e+06	419185	1.32098e+06	2.1926e+06
416.816	13.1412								273529	313501	375598	643891	551163	563884	742638	977736	373319	1.46526e+06	940067	986299	761186	468475	462526	881002	585149	76482	430705	722104	284363	880884	258127	700604	554309	542800	216581	64811.5	1.27857e+06	319034
416.823	4.77016								437426	368825	238204	179514	709029	-	571627	1.52695e+06	332013	604205	2.00837e+06	417468	163334	237836	389168	321936	468306	221416	1.28471e+06	1.76297e+06	954877	1.20957e+06	1.33504e+06	1.13462e+06	322868	663118	327073	823497	664062	962910
416.833	5.32287								335984	65100.8	161755	378569	197133	325343	188729	634852	508795	742445	713940	369836	394603	296775	119522	333044	450319	160651	1.14305e+06	526874	741881	800155	711045	582499	383409	499471	397140	312988	372068	459543
416.835	4.30018								216553	390349	905903	375732	859277	736836	1.01685e+06	784943	566800	467398	1.84171e+06	681827	463083	501981	315552	328616	728893	846632	2.04424e+06	3.1757e+06	1.73501e+06	1.02245e+06	2.17058e+06	954392	678474	588392	951922	627334	356039	1.05025e+06
420.731	5.06401								160857	129858	32720.8	39709.6	121890	90319.4	223461	101480	18550.1	140913	114549	-	131266	32649.7	239314	7701.82	-	13054.3	150370	144549	219692	77158.6	221338	205380	1.37812e+06	750255	717209	823667	592099	681216
420.786	13.1902								1.47654e+06	796532	860187	682761	1.17179e+06	513619	1.07281e+06	626057	691950	535472	437177	747905	670073	379831	515019	288272	293307	694129	159881	1.10704e+06	762745	493278	711214	1.17042e+06	466094	1.32571e+06	1.01961e+06	1.17618e+06	345792	1.21064e+06
420.909	14.3829								1.47215e+06	1.79789e+06	1.64888e+06	1.10153e+06	1.02606e+06	1.0605e+06	1.52115e+06	1.17636e+06	1.99997e+06	693614	970351	1.29403e+06	619360	1.3693e+06	547870	919926	1.23938e+06	1.09264e+06	1.76492e+06	1.27101e+06	1.13776e+06	557948	804067	659079	2.13557e+06	2.27691e+06	1.57845e+06	2.52795e+06	2.77397e+06	1.92834e+06
422.841	4.21899								729478	1.12023e+06	785912	848059	1.11048e+06	776627	129068	126919	599318	902801	556903	-	444691	231066	301539	55817.2	345892	310517	279518	156157	645756	-	304874	156359	207023	62016.3	127427	410941	256510	657813
422.891	14.1792								206589	1.0095e+06	409136	82273.4	228983	365745	1.05002e+06	629079	628525	992931	504915	1.34462e+06	495698	764508	719259	396296	512048	696222	425726	376485	570536	554564	350482	432746	1.3559e+06	924433	943318	587631	1.49324e+06	1.17994e+06
424.797	4.20607								96678.1	379667	746306	519805	285924	1.23785e+06	191875	-	448641	-	420250	336859	449049	225556	200948	873071	386969	78406.7	267276	-	368521	-	211464	689722	72923.2	285470	-	31884.9	76044.1	315672
424.818	13.1151								208822	229620	218917	-	97390.6	78280.6	251058	294153	227867	429862	449180	105280	315657	525743	262587	197575	832529	283003	183054	296496	185281	291158	633728	78771.7	486410	544599	671304	439811	985619	491971
425.76	4.18286								376381	408957	521690	370408	306009	463443	293172	248483	422585	-	214915	49981.5	585483	112548	105816	405075	516085	391412	291829	103987	-	129601	-	870910	711923	589851	830685	578006	581839	638119
426.847	15.2569								424732	191943	522603	368226	179273	517018	694907	86038	343306	564086	195681	194573	2.93446e+06	1.65523e+06	1.50705e+06	2.20962e+06	1.35508e+06	2.59621e+06	685621	579944	428968	744382	800688	566893	241724	494505	496542	534219	307554	267376
428.824	4.45368								50008.6	125057	73294.4	-	85541.2	262126	-	84102.2	-	281084	152696	525175	272905	91984.2	545454	-	174925	425102	67627.9	493291	52463.4	828579	476960	280505	241076	67448.5	88096.7	-	152867	102479
430.871	12.9062								160776	218872	134795	146476	198574	113934	644350	52698.7	636585	204699	37981.5	46373.5	112566	99732.7	161374	129450	125698	261631	129029	531683	300160	229111	523914	204856	204920	320983	68084.9	535127	423719	419217
430.877	4.60384								142060	131561	-	15218.8	41199	159245	767552	280923	300209	188937	430025	983870	235703	204092	90194.2	177244	291110	450215	391888	294387	756944	459096	189743	594160	177726	31675.7	179920	392192	155255	145999
432.838	10.3133								124366	289712	212574	96152.4	485214	132164	4.33577e+06	3.08591e+06	2.55161e+06	2.24791e+06	2.20832e+06	2.14378e+06	1.61982e+06	751986	1.74032e+06	1.13049e+06	963140	729391	1.90363e+06	1.31711e+06	1.311e+06	1.75207e+06	1.15039e+06	1.64869e+06	1.18297e+06	969477	683647	952185	963767	1.09565e+06
432.903	12.9095								307457	270323	209627	152344	296938	228064	98047.5	297635	394202	746584	632414	239275	247717	458033	378476	266972	340611	851614	715230	183869	219365	328106	812614	203013	438260	-	347067	570110	204330	336430
434.791	10.2797								340306	540210	525956	582297	498979	437117	560961	114376	376164	302213	310199	189621	2.2654e+06	2.39688e+06	1.9889e+06	2.59137e+06	2.22679e+06	674926	651369	404405	677019	861620	1.2432e+06	1.02166e+06	506091	419135	72403.8	276608	420670	473743
434.896	20.9755								583716	724510	466690	884878	401955	797110	429640	623889	642130	576840	642553	355067	551581	1.07877e+06	893989	1.11681e+06	763437	1.25065e+06	1.19921e+06	1.46819e+06	990977	443722	932804	662073	658448	429042	308657	570347	823723	457789
434.897	17.3387								652862	1.0683e+06	744276	326947	686760	466422	729747	418441	587139	443982	375286	222653	538810	407365	260308	232133	662801	330436	294542	775125	658783	325408	417364	582836	239694	113167	544739	390311	637842	354589
436.762	13.194								543395	241306	299958	601886	310418	178489	226542	283202	351972	574003	242748	536015	215974	241673	947989	582909	194508	847631	140055	362520	561435	960950	611040	254396	436362	404214	249249	887525	397829	479358
439.795	4.90312								215968	450463	175083	206694	230196	18387.6	858620	403964	1.20416e+06	746872	792843	840941	115796	435158	146858	316704	419868	148712	795754	376181	1.32285e+06	868963	47019.5	1.07519e+06	326335	166169	128390	121917	278824	276573
439.811	4.41639								464704	274882	-	382708	398853	259983	456808	3.81842e+06	1.83045e+06	1.09583e+06	1.99088e+06	1.39005e+06	55344.2	576694	395641	900764	181168	132882	1.15451e+06	783421	1.49265e+06	-	673940	2.85624e+06	911123	530020	571591	683459	1.25361e+06	1.10997e+06
440.81	4.10011								862373	593821	1.32174e+06	577345	2.73233e+06	841930	1.40502e+06	688314	1.52685e+06	1.32597e+06	887530	1.15778e+06	641071	415527	1.00991e+06	450543	1.09179e+06	919627	1.12859e+06	1.00407e+06	964878	1.32548e+06	868925	1.1944e+06	700792	457004	263687	830994	900964	238612
440.818	4.74903								287856	461128	225746	291219	857391	182196	324034	165011	839613	310160	393856	372729	404228	70629.8	417166	383979	1.03671e+06	251818	539245	1.25739e+06	763529	541029	890026	492946	268198	127296	237873	329360	165373	318533
440.83	12.4515								1.60658e+06	1.06757e+06	852460	647042	1.27422e+06	884321	975689	369052	852496	1.01417e+06	984350	716499	904265	1.37121e+06	1.08763e+06	930121	837204	1.34837e+06	1.51134e+06	1.14518e+06	1.13964e+06	1.09382e+06	2.22952e+06	604341	1.11581e+06	1.35718e+06	1.18391e+06	5.72182e+06	1.03223e+07	6.86608e+06
440.933	19.3235								237010	112499	86459.5	138961	236278	204338	229526	165842	247854	70285.7	274933	139022	441088	351817	388026	249682	319424	195107	176056	233232	206790	140986	485261	317888	2.13347e+06	2.12937e+06	1.72062e+06	679966	1.24381e+06	671870
442.915	20.8174								534335	459400	370151	662603	554688	715960	227695	327026	740040	465295	657307	204814	792820	407022	447928	495616	1.40788e+06	1.12927e+06	570687	508576	700452	593531	787573	343407	515403	348277	513764	548755	523267	491059
446.864	21.746								414385	379744	249160	835436	1.09864e+06	1.40494e+06	407349	301477	653028	466770	302104	580809	943526	1.13938e+06	964390	1.73242e+06	1.38045e+06	2.39098e+06	257254	550326	311675	621056	703818	651077	978855	831660	1.11711e+06	2.77595e+06	2.28399e+06	2.19671e+06
447.899	14.4054								303395	81700.5	485870	365404	559915	583665	209497	176835	155925	221870	660459	536619	409105	581651	267454	209294	113972	532735	451150	538154	218940	207147	459897	216562	484821	1.03095e+06	577220	257478	429112	536659
450.871	19.2303								5.83414e+06	6.47106e+06	5.26876e+06	5.49273e+06	5.78578e+06	5.64486e+06	4.18327e+06	4.60279e+06	4.66524e+06	1.59652e+06	2.71756e+06	3.30785e+06	4.26499e+06	4.25826e+06	2.87396e+06	5.49559e+06	4.65885e+06	5.81883e+06	3.79084e+06	3.70832e+06	4.08502e+06	2.39184e+06	3.30684e+06	2.26705e+06	1.84517e+06	1.98509e+06	1.56505e+06	2.84138e+06	2.71403e+06	2.35389e+06
450.879	23.7422								8.48627e+06	9.34197e+06	9.97608e+06	9.48931e+06	7.67659e+06	9.20603e+06	5.76089e+06	5.75858e+06	6.00812e+06	3.73631e+06	3.22925e+06	4.30115e+06	7.73045e+06	7.29403e+06	5.71964e+06	6.32184e+06	5.37239e+06	8.04858e+06	6.40449e+06	6.01587e+06	5.77645e+06	4.27348e+06	4.06638e+06	4.57448e+06	2.51434e+06	3.57067e+06	2.37981e+06	4.35732e+06	4.04308e+06	3.5383e+06
452.779	15.0195								854834	943329	863164	369407	969036	553445	655880	528750	1.468e+06	568344	1.64027e+06	906373	956206	1.61608e+06	788702	799503	661585	273343	467185	680643	273120	576156	570204	169060	1.07311e+06	524186	184428	817344	405548	842967
454.797	13.2113								425358	236421	294258	123512	279495	526411	147746	566932	660771	92905.4	629115	335488	503905	208684	548179	156419	569678	90318.6	325627	107931	58316.7	60883.5	153898	191819	67629.9	57258.1	183383	311967	908961	448306
454.873	19.2305								640602	543449	482896	606945	321634	310593	59978.4	175619	165794	86603.2	100707	192045	529747	562639	563201	441015	596597	703447	182662	81386.8	130490	151252	95411.9	106567	6.18395e+06	5.9131e+06	5.51931e+06	7.7309e+06	6.72201e+06	6.84123e+06
456.868	14.2448								504779	659384	740192	1.05863e+06	702998	288934	908591	895491	791812	685064	490509	576978	948760	824665	698959	522284	681212	980041	198180	311427	837151	434179	799132	60471.2	1.54799e+06	1.6947e+06	568673	1.49053e+06	795758	1.48462e+06
458.776	4.1499								164929	66710.7	123026	391416	508002	167564	675773	711507	512368	121177	946714	319420	437835	-	596698	229915	78619.1	207056	627693	933593	743614	116391	173451	186394	464380	653722	1.17392e+06	32837.7	493921	602421
460.763	4.51693								304534	66205.2	144245	27985.7	172242	52336.7	231436	597724	508443	38738.3	936582	73280.5	239541	209537	278069	528415	482880	566612	65913	-	-	293073	109235	231194	91391.7	244634	28120.2	356347	162727	-
460.88	13.7309								366476	168197	652052	527325	581894	811170	1.05761e+06	1.4069e+06	806689	1.36871e+06	674260	886356	1.72803e+06	776100	1.21408e+06	613394	656130	609234	445551	852835	457172	930231	568582	749084	130554	396298	925611	1.63967e+06	412164	561989
468.79	15.363								5.21556e+06	4.95142e+06	4.53228e+06	4.79066e+06	4.6547e+06	4.22715e+06	3.40604e+06	3.47544e+06	3.34119e+06	1.54841e+06	1.5038e+06	1.28837e+06	1.43329e+06	527218	594083	2.16675e+06	2.32868e+06	1.94482e+06	4.20737e+06	2.56146e+06	2.40888e+06	2.57045e+06	2.89259e+06	2.65161e+06	2.02306e+06	2.31279e+06	2.54101e+06	2.12911e+06	1.89018e+06	1.8493e+06
468.797	13.3967								381485	115204	216444	541648	326227	416109	233739	106422	168966	180997	72238.6	125369	207041	176378	141325	226663	281543	320156	362270	179794	131154	101233	471226	113680	625144	938681	322802	904769	418146	589529
470.854	14.1483								127928	77186.6	99065.5	444471	98176.6	197728	369578	212451	157742	121093	122384	87836.4	377568	84430.9	159960	445016	131076	149516	268755	238631	212289	309801	489069	152285	1.11105e+06	651773	258512	744450	1.60002e+06	1.23785e+06
471.819	11.3666								2.48778e+06	1.51978e+06	660345	478514	1.43249e+06	343679	4.66377e+06	1.48949e+06	4.21858e+06	2.68199e+06	1.48408e+06	3.16781e+06	274459	623204	311220	3.71439e+06	3.63141e+06	3.55629e+06	4.85449e+06	4.12043e+06	2.35345e+06	3.75369e+06	3.29059e+06	3.52675e+06	599572	304887	781528	595755	688498	2.28061e+06
471.828	13.112								354879	298530	22258.2	108906	156665	518588	684417	-	757225	836103	661754	1.15684e+06	46813.4	83094.2	382976	1.47097e+06	1.24216e+06	650542	303483	502600	188026	750849	427013	31372.5	1.35677e+06	454281	345781	329118	428761	246372
471.893	4.79293								-	93909.3	136093	563359	-	14674.1	69802.7	-	321536	347881	45135.9	536819	264943	91685.6	663919	504404	171646	-	278564	486453	175322	539765	437047	714916	225549	-	115758	64808.2	359270	116787
471.916	4.17362								818717	304534	627970	1.27055e+06	455166	272463	-	559118	1.70075e+06	782735	1.45488e+06	1.21358e+06	577325	2.78569e+06	495903	698995	758672	769503	1.86459e+06	998821	1.18e+06	2.6162e+06	2.13738e+06	381755	428980	368303	192916	405319	1.13965e+06	364636
472.745	13.0776								2.15866e+06	1.15536e+06	936926	868268	1.26573e+06	756195	1.09773e+06	1.59044e+06	1.00296e+06	1.42406e+06	1.53306e+06	2.50855e+06	672790	1.34618e+06	1.97421e+06	498329	769810	648773	1.83755e+06	730783	620304	1.89196e+06	1.27082e+06	704318	916118	366006	1.92847e+06	571933	2.09397e+06	1.15667e+06
472.765	15.2125								536274	902381	447863	693305	157430	271859	347131	348937	252324	510019	193879	528398	511262	903655	725351	287344	718140	317867	1.24582e+06	500166	859380	627959	957971	329879	717371	604407	738892	876086	726650	383795
472.858	4.35543								1.7676e+06	1.14481e+06	362760	1.60173e+06	666939	1.76145e+06	1.96661e+06	1.22638e+06	3.42298e+06	-	7.47309e+06	6.38321e+06	-	-	2.19845e+06	2.43479e+06	2.86299e+06	508788	6.24817e+06	852237	3.79399e+06	3.06653e+06	3.81134e+06	4.41693e+06	1.42852e+06	831023	1.63363e+06	2.60159e+06	3.11306e+06	4.08101e+06
473.86	4.41716								281142	257370	73079.8	393405	80126.5	45917.7	1.25001e+06	721317	1.40793e+06	440252	1.88847e+06	1.09693e+06	397366	448814	2.71728e+06	835118	654561	287284	3.54025e+06	474316	244811	553744	2.54889e+06	1.34165e+06	252506	309332	-	1.08761e+06	938201	680762
474.804	13.2873								99492.9	330549	569983	936424	569325	241427	143319	105977	284662	441784	404136	467561	595172	610240	145335	557709	306769	412376	346476	460244	172680	512165	506953	169479	284740	690466	1.22315e+06	357623	269270	769196
474.833	4.33748								111300	414727	-	246662	534009	457842	976372	855552	894777	805479	668790	847670	580462	608853	325838	219847	159062	469169	308084	449505	888269	648254	585365	782086	94680.4	408738	560774	190406	204720	441668
477.026	13.2494								178180	390286	100965	170666	74213.7	43820.1	396340	245491	363788	153773	337639	132701	282938	544155	267693	45533.9	480867	423914	269229	527679	206465	279267	605707	407735	89625.5	311978	225539	131147	239081	144950
478.77	4.12159								313565	171155	93264.6	295675	435054	554964	764860	128363	31698.9	-	499821	50728.3	1.52356e+06	1.05568e+06	2.17486e+06	1.14393e+06	1.75142e+06	2.32595e+06	150841	296061	-	260198	111122	573606	304449	-	376388	713257	779990	245388
478.829	14.0776								2.23149e+06	2.81809e+06	2.34415e+06	1.31754e+06	1.96446e+06	3.06118e+06	4.57004e+06	3.8654e+06	5.74316e+06	3.96446e+06	3.16949e+06	2.03351e+06	1.43093e+06	1.79799e+06	1.94494e+06	1.4802e+06	755738	1.39818e+06	1.11089e+06	2.4482e+06	2.2939e+06	1.78594e+06	1.02679e+06	1.2749e+06	882698	1.04351e+06	608197	909310	1.29606e+06	818902
480.808	14.9481								1.80021e+06	1.05329e+06	536749	933252	866403	949924	723954	1.14578e+06	994904	219842	741161	372654	416625	378060	557461	3.05183e+06	1.59738e+06	2.12243e+06	974909	1.14465e+06	730898	1.32761e+06	1.13487e+06	718764	745898	818574	342929	1.02822e+06	2.10128e+06	1.12889e+06
480.809	4.36646								48643.3	286189	32625.6	170008	360755	254255	-	190117	109036	493167	234522	376753	1.58828e+06	2.02707e+06	2.25638e+06	7.14672e+06	6.43142e+06	2.23452e+06	690888	865549	228006	863828	689544	1.77938e+06	56257.6	220627	306309	148347	223850	110579
480.862	12.8096								371528	129930	584216	362234	216335	48572.5	364352	155914	899022	1.22019e+06	391312	1.04026e+06	341113	455046	479689	1.05256e+06	264870	464917	276361	249168	292102	426961	618559	967768	379505	487769	364272	551836	199763	407825
481.808	4.06798								-	-	-	614958	126664	160199	53551.8	-	-	97452.2	358181	313850	439961	108523	293202	1.56207e+06	888249	1.16881e+06	-	345350	812550	231208	188373	221531	-	61607.2	57204.5	-	-	189993
482.857	14.2903								772146	279634	634687	1.14371e+06	892968	641982	354099	849094	613985	1.06694e+06	1.30075e+06	615487	547624	905479	867016	1.66888e+06	457861	409837	713845	832054	550758	564762	1.15036e+06	640078	483103	806657	503013	919160	1.07972e+06	533715
484.758	11.2946								622461	704522	703985	506061	505198	525050	700408	920519	524601	753888	455927	565709	1.20387e+06	1.83497e+06	1.33924e+06	1.69981e+06	545634	1.17148e+06	79755.3	119326	348585	184912	103027	91432.1	932018	734118	782273	1.02156e+06	1.02652e+06	1.21859e+06
486.758	14.7017								193045	402007	1.24003e+06	965918	170110	741567	268430	174561	322268	330977	98249	348390	149087	544270	711636	481183	289152	896557	663475	328621	88342.9	383668	444981	236538	175750	331010	327009	783170	233766	815353
486.78	13.1483								250881	1.37806e+06	134010	517948	574528	798945	376052	313190	537521	799742	365843	225360	1.03523e+06	794743	304929	197164	392363	674346	241453	599246	362991	1.10787e+06	544481	575456	374858	1.84686e+06	310053	460880	858496	389581
488.721	13.1186								2.36671e+06	607050	1.45565e+06	1.43738e+06	1.43048e+06	2.65565e+06	715112	1.33429e+06	1.55213e+06	1.68543e+06	1.02152e+06	970438	1.66059e+06	321306	1.76724e+06	643011	1.23189e+06	1.60301e+06	2.25216e+06	1.84432e+06	1.05245e+06	1.69747e+06	1.50947e+06	549265	1.36894e+06	1.05029e+06	839873	777462	1.1391e+06	854521
488.885	22.3809								1.32463e+06	1.12198e+06	1.30456e+06	1.93351e+06	622376	1.10167e+06	271312	174400	409293	169087	280356	449999	3.57903e+06	3.12184e+06	2.44494e+06	5.20364e+06	3.30505e+06	5.2399e+06	399086	470952	474980	215489	294872	475947	2.37462e+06	2.85128e+06	2.19934e+06	4.58535e+06	5.37238e+06	3.28325e+06
489.637	13.2375								133948	894486	580362	207015	473938	629227	347279	429893	130502	152174	366732	92530.6	119555	350828	505162	84071.4	250190	553003	239487	252817	519862	246250	177803	300916	227544	347846	92247.3	224030	337622	326881
490.692	13.1237								193276	699281	511914	311214	160250	174814	272696	601615	138521	499854	312609	349060	994330	170187	198982	267088	160126	82886.5	458189	327703	703278	398528	55699.2	512121	591842	830454	156821	232717	559170	612626
490.873	15.1457								976398	856383	618734	734647	275450	419972	1.22994e+06	1.03778e+06	1.8645e+06	1.23837e+06	1.61053e+06	1.39236e+06	787128	725650	885267	604173	754509	1.04449e+06	950826	989442	1.09178e+06	1.24657e+06	1.06019e+06	846832	653883	661937	907000	595135	1.17506e+06	1.03316e+06
491.494	13.2528								251086	134794	81810.2	70168.6	72060.2	-	117178	316492	176304	-	95429.2	77429.5	201618	407423	30908.1	50554.1	243805	131884	68970.5	161911	277123	603538	170412	180372	67366.4	143826	350299	310881	600584	852062
492.64	13.0217								432107	233590	394867	105550	115032	317316	149249	203040	210970	398571	421619	285679	114720	354592	336071	255864	161413	331279	324823	193891	256414	364620	112400	225983	54499.3	534272	217998	567911	515240	866456
496.809	4.24083								767513	531120	326722	-	511144	286888	391730	705289	869464	196724	1.73941e+06	733313	867901	569395	327139	1.25547e+06	321503	872020	1.2462e+06	475030	631638	1.05535e+06	608935	1.00476e+06	280628	265231	119275	263956	150612	-
497.897	4.48334								28285.8	20209.4	112735	386206	177129	161093	575400	59274.2	-	30625.6	384376	127620	-	78332.8	97802.6	-	136806	85191.4	225720	331224	114018	488508	354283	233624	294706	41470.4	81571.7	60951.2	143808	196958
498.792	12.707								64137.6	148592	220334	65651.3	38756	82471.4	159152	82633.7	289446	1.19232e+06	361939	306274	540512	622745	601352	498820	562382	296689	285120	447761	540659	352741	140311	200662	19458.4	132500	82202	77212	52026.6	207977
500.839	4.75715								231953	140377	206152	28185.1	30630.5	169968	203178	343036	427435	311648	289961	241755	101437	43375.3	241126	84285.8	59081.5	-	990785	196952	-	509237	594670	132952	204214	42043.6	168952	217705	-	169306
502.802	4.32516								403574	220175	65680.6	572686	292366	406128	857921	90962.1	786275	1.60232e+06	289342	54161.9	318025	311431	456283	1.06853e+06	1.04674e+06	75423.9	922257	546413	235388	423112	550283	82775	197609	15531.7	299284	221723	56594.2	313423
502.86	4.6957								205948	166108	168980	503893	178577	127706	422291	177944	277152	1.42283e+06	440331	117843	308654	296694	296878	165348	228805	174551	814401	86549.5	96143.4	333201	855486	352688	78507.9	164456	132181	-	94542.9	189193
504.862	15.3747								897624	290043	883512	1.11948e+06	1.34629e+06	503131	451484	161399	344901	304725	167578	130830	854154	868478	303429	586405	505328	563216	113505	197467	433782	352522	219919	204528	271234	389353	105603	155442	424619	238736
512.774	4.33459								1.36559e+06	1.37207e+06	1.29238e+06	992580	1.78178e+06	894666	1.02433e+06	4.07292e+06	1.72443e+06	844395	1.5951e+06	1.49484e+06	1.14666e+06	1.59098e+06	831880	1.70343e+06	2.61969e+06	510501	3.10986e+06	801999	1.51451e+06	2.65205e+06	1.47985e+06	2.14135e+06	388027	708424	274075	560672	282082	513970
513.665	4.75605								199494	85891	106037	24935.2	387417	129951	-	57608.2	255302	340569	134710	347561	97136.6	236012	37075.4	247088	216140	53919.2	412089	305825	176900	243254	467619	472773	15013.9	6851.65	16449.4	58940.4	24836.6	123616
516.781	4.23565								444519	169506	674250	565264	839398	597342	812971	339016	110788	839318	119097	960593	69881.9	673981	970840	1.8099e+06	506475	513437	637002	1.06222e+06	298438	1.01881e+06	872086	72165.5	-	302818	355861	951923	114217	305399
516.881	14.569								80161.9	96974.7	238796	530909	276302	53858.2	303375	112403	92505.6	203145	569148	184481	243781	112130	143771	247082	142606	215182	930220	1.18918e+06	939361	879474	656801	974417	201951	132214	235914	186394	149749	359341
518.735	13.5671								494044	520879	1.1992e+06	486641	207221	1.09978e+06	1.26055e+06	822527	1.36568e+06	276707	516835	664272	455283	387623	355803	215937	225039	559905	517222	845118	1.44256e+06	1.0297e+06	592783	639441	730005	201775	633825	261599	136920	230031
518.842	16.905								628406	561820	998760	696428	726409	516826	1.09241e+06	646815	1.00856e+06	1.18369e+06	1.04971e+06	731052	342894	335627	663668	664444	360466	642657	2.69234e+06	3.10739e+06	2.57084e+06	2.99211e+06	3.18263e+06	2.93406e+06	200421	146401	62509.3	192341	140308	255576
520.764	4.08521								553794	744606	211077	645345	1.38796e+06	867984	1.09607e+06	654226	1.00596e+06	667554	815873	597190	322849	278438	347404	540116	872719	672178	448357	164660	738660	1.65166e+06	972015	326069	149117	589899	847168	601228	86740.4	596027
520.823	4.81162								43388.6	53303.5	222060	303600	178644	200436	359406	310952	361883	258820	653867	24730.4	208080	153192	412192	180962	-	108985	867756	322363	208786	119701	359208	212051	129904	28080.3	167742	129183	176923	19978.1
520.866	15.1275								794227	376989	826822	1.02343e+06	350795	537044	814410	231633	331142	450075	374686	280952	1.08083e+06	1.04718e+06	774539	829461	1.07935e+06	1.13643e+06	642756	584183	598976	242957	541921	856045	442001	277421	92785.4	899292	381670	760268
521.698	4.33569								156219	100084	129322	134200	-	23790.7	112324	55348	508026	-	-	-	97654.6	162075	164844	681261	332315	371541	-	452886	-	155486	134324	-	94769.4	-	638790	106380	318032	204493
522.802	4.24667								772403	558210	528972	171708	171854	405102	131030	606069	491342	740828	-	451235	313203	358471	128098	332283	660995	222028	408846	-	786830	486717	293968	753208	128779	102105	415324	272217	201555	266861
522.879	12.9921								86841.6	98913.7	199634	343489	133010	265204	113914	121914	254204	390607	504080	236369	318416	240998	96059	671175	514671	624072	371315	165713	323147	137245	101752	281915	167445	399636	252090	748716	398951	835650
524.824	12.8941								1.16796e+07	9.78353e+06	1.02121e+07	8.83001e+06	8.8148e+06	1.10832e+07	5.26364e+06	2.96134e+06	2.08098e+06	4.19624e+06	2.44893e+06	2.03791e+06	5.5149e+06	5.53969e+06	6.10858e+06	5.1397e+06	2.04678e+06	4.68535e+06	7.31734e+06	4.52848e+06	3.9901e+06	7.907e+06	6.31282e+06	6.48921e+06	626147	3.55613e+06	1.4999e+06	1.0465e+06	1.0289e+06	5.38448e+06
525.735	4.01421								151374	69179.2	156737	157527	31620.1	75648.1	-	-	219051	-	329010	-	88463	127438	423910	199797	-	98571.1	-	-	171422	505356	37376.5	474812	20795.2	41208.9	191450	-	19506.2	163987
525.818	12.6292								1.55556e+06	1.52705e+06	1.55112e+06	1.17656e+06	537214	2.55052e+06	924816	95044.8	402871	1.24934e+06	698069	885115	412378	735094	549347	186350	52735.2	659499	1.26001e+06	922781	1.1367e+06	1.3329e+06	1.87506e+06	1.06268e+06	315576	973141	313601	893173	401262	277620
526.753	4.4452								474697	784374	282995	130700	384749	446758	310086	416451	573134	549178	723266	462435	354309	1.09056e+06	693890	991503	291434	585059	738311	547696	487792	696565	833734	226217	235826	326182	465274	297579	384295	452500
526.85	13.8549								330066	838409	856645	254953	1.14895e+06	142207	398105	323520	640745	859972	250078	409240	396520	112982	348575	403657	978169	715772	837541	1.0637e+06	266799	698417	944653	585497	758066	620431	390653	788076	923551	588148
527.772	4.24545								91323.2	98480.2	402853	262158	49757.6	369082	462039	-	279436	-	-	61473.3	410880	268864	100587	431442	977837	525800	765252	1.0775e+06	-	670031	1.00526e+06	951515	185862	92603	662208	659953	371204	563602
528.781	4.13577								385524	319349	294505	218378	200364	174502	451243	468093	342365	515162	340983	583212	-	411143	441883	293851	317413	414737	1.34169e+06	228942	101739	366049	1.47786e+06	315833	40231.5	271427	99754.4	-	260664	569037
530.66	4.1542								428297	304324	287068	107707	53445.9	163993	-	168834	-	-	513794	208626	-	666360	-	-	122987	325293	-	247206	183465	-	386219	-	-	125397	-	-	33047.5	-
532.812	4.24211								4.26646e+06	9.4215e+06	4.23178e+06	1.30356e+07	3.97338e+06	4.59908e+06	9.84531e+06	3.57953e+06	2.31464e+06	6.15995e+06	1.32969e+06	4.21312e+06	4.48881e+06	8.42238e+06	7.77675e+06	1.41197e+06	3.80821e+06	2.49259e+06	7.96033e+06	2.89964e+06	2.48972e+06	6.49598e+06	8.07833e+06	2.7028e+06	491143	527285	734323	919427	385077	795870
534.734	10.6022								362486	324856	128239	326632	697568	673534	805768	1.74261e+06	619405	1.33867e+06	1.57276e+06	1.33457e+06	434052	512429	408936	292892	400019	392524	494243	591559	403645	292806	155710	129855	830354	1.28622e+06	786849	344058	516101	399512
534.744	8.63764								1.5703e+06	1.60456e+06	1.00077e+06	1.35729e+06	1.08959e+06	1.42675e+06	947030	5.10726e+06	3.68714e+06	3.81337e+06	3.98093e+06	5.60991e+06	815371	1.50143e+06	433866	733068	901447	795338	715359	440548	1.95994e+06	391913	646919	410624	2.31341e+06	2.20851e+06	2.21308e+06	746247	895308	967962
534.753	7.02199								5.13769e+06	5.1863e+06	1.12526e+06	5.16807e+06	3.87888e+06	1.56111e+06	1.30266e+07	1.76725e+07	4.78487e+06	2.23584e+07	2.62626e+07	1.81432e+07	4.67429e+06	6.3686e+06	4.46687e+06	2.68638e+06	1.67813e+06	1.38579e+06	6.27993e+06	5.77162e+06	1.88537e+06	1.11953e+06	995350	1.51524e+06	1.30696e+06	901417	6.91775e+06	1.71345e+06	939857	460588
534.782	4.0579								254979	916543	587013	600856	668120	1.33822e+06	706118	0	623212	665734	971649	1.05438e+06	616291	581151	825635	719099	253926	83359.2	758605	0	97057.9	600238	33306.8	961337	44771.4	0	106921	0	196995	132931
534.82	15.4467								385755	83311.3	253591	123172	315690	728317	103357	242554	111905	356977	367809	424818	325593	126420	124183	119176	166207	184139	161486	55282.2	151503	194765	100568	184992	185385	215557	99050.9	222387	156648	87408.5
534.862	17.7444								910121	467758	593420	1.11106e+06	1.04309e+06	705671	3.11232e+06	2.96397e+06	2.26322e+06	2.07269e+06	2.18449e+06	1.85038e+06	698948	1.44201e+06	1.29435e+06	961575	978632	733532	2.56773e+06	2.80606e+06	2.55408e+06	1.6224e+06	2.38824e+06	1.26773e+06	1.47926e+06	1.49111e+06	2.06845e+06	1.43541e+06	809446	1.4203e+06
536.841	15.2861								1.16917e+06	1.19171e+06	1.43553e+06	1.86841e+06	731141	1.78948e+06	2.21039e+06	2.1545e+06	1.83644e+06	427473	3.47625e+06	3.65314e+06	1.93226e+06	1.29667e+06	1.71839e+06	331769	100807	1.506e+06	2.45648e+06	2.26464e+06	2.14112e+06	2.00493e+06	1.25666e+06	375650	374378	941853	788906	1.85327e+06	1.52985e+06	1.28819e+06
538.783	6.19734								2.58817e+06	3.45711e+06	2.32014e+06	1.17694e+06	524355	1.64642e+06	2.52325e+06	3.11914e+06	4.71126e+06	1.35867e+06	1.35173e+06	839676	2.45721e+06	2.42857e+06	3.09702e+06	685387	2.14724e+06	2.29368e+06	4.84521e+06	6.25503e+06	3.39152e+06	4.07766e+06	1.96037e+06	2.55508e+06	4.16697e+06	3.73591e+06	2.6718e+06	3.18226e+06	3.38389e+06	1.34277e+06
538.831	14.4528								106737	440388	329634	197434	246606	463673	603205	797079	777528	930061	387908	467112	884432	953133	1.1521e+06	238420	448226	568974	1.00164e+06	481312	700020	632825	293548	617485	1.08901e+06	825880	351935	1.10268e+06	948433	440488
540.803	6.90702								508431	508926	262319	853395	538087	413921	1.08738e+06	878669	957824	541849	506394	247515	991081	684542	908658	253826	1.12801e+06	321014	510524	1.13443e+06	1.06288e+06	1.03117e+06	1.16217e+06	855574	520885	363981	845090	567525	820645	963739
543.885	4.54814								46186.6	-	-	184229	189797	87559	350568	130758	75093.9	175966	157096	51153.7	192143	60537.1	181101	121464	182161	178832	164820	109715	-	63275.3	623946	-	370457	41281.3	244814	56689.7	284675	-
544.756	4.18402								370342	351363	225617	79275.6	122337	278753	179407	573504	291624	670436	472511	840018	157661	906024	337150	821030	127443	336802	486883	164243	-	659133	683053	-	138500	420656	101317	230188	532537	639903
544.776	5.71092								328901	651987	531542	724550	593447	602274	1.18323e+06	528302	1.3438e+06	816246	854071	204718	1.78724e+06	940792	1.91462e+06	1.00991e+06	1.06391e+06	551013	903416	1.02745e+06	1.23091e+06	472534	899757	204446	208945	846426	272480	723525	747575	1.13656e+06
545.851	4.24162								-	152867	229914	187808	431254	71136.8	137711	183685	158984	383955	699772	677909	282442	614108	-	358616	-	41384.7	261513	351728	224645	195239	296682	530990	-	333503	384451	176003	-	569562
546.802	5.62483								288368	385917	400112	422634	319232	476492	632148	248712	546512	589515	1.55476e+06	850407	486504	1.04733e+06	1.04075e+06	379731	772651	1.02117e+06	1.28196e+06	342786	206493	1.21236e+06	407947	345265	235256	245276	319618	500178	364435	751311
547.795	4.63266								-	380911	64242.2	409269	-	119526	408255	102942	307593	494290	435264	146685	215426	122090	236913	191033	-	169116	204588	418327	-	203680	165400	117402	172354	74054.7	-	95336.9	175618	195966
548.746	7.05025								195408	146038	466692	204405	75573.4	285734	532223	668305	624217	971288	951908	729913	854294	355580	763258	487923	233687	579411	429218	904146	392525	580543	643201	932707	242072	367488	408479	714056	936567	1.46561e+06
548.791	4.06622								59564.9	411096	97484.8	833427	50257.4	306290	236892	722000	649412	-	469162	872069	792377	174784	253384	861192	475948	127857	421130	323595	49076.5	104396	565872	1.88247e+06	76589.5	17322.3	141115	167110	876704	176733
548.816	4.5702								194884	272287	69851.9	125949	283080	219879	112114	733529	348520	214128	675653	563797	883181	586619	434387	638884	103581	169122	307360	436835	433702	231861	226800	418858	254267	309867	-	175669	141758	86368.5
550.839	15.5387								2.79279e+06	3.4236e+06	2.67485e+06	3.55791e+06	1.89017e+06	3.30046e+06	538508	917987	802729	549499	328161	600782	411507	1.34364e+06	218365	743208	174125	190117	1.56788e+06	1.11361e+06	1.40514e+06	1.33913e+06	661115	730424	8.94676e+06	7.57756e+06	7.79101e+06	6.94446e+06	6.4804e+06	5.70847e+06
554.825	15.1109								3.73784e+06	3.59076e+06	3.01722e+06	2.88543e+06	2.38396e+06	1.49688e+06	2.0137e+06	1.6329e+06	1.83884e+06	1.37201e+06	788550	1.6038e+06	1.00979e+06	408372	1.06722e+06	798446	353550	518528	865321	994126	1.03475e+06	1.26903e+06	1.55777e+06	737603	730258	1.11747e+06	969000	1.53517e+06	1.25493e+06	1.35538e+06
555.359	12.8822								81465.6	261638	282518	609152	272577	137497	22703.7	154321	134212	43376.5	178485	369860	243591	290402	89763.3	74409.9	52717.8	46875.6	102217	41917	30312.2	320150	165359	373198	58255.3	37898.7	943394	130284	439941	98920.4
556.663	4.15908								232319	192854	446284	122839	277592	612286	394396	402738	478048	742505	-	156977	355499	338401	382249	294500	134815	415315	1.45764e+06	251108	79442.3	946735	177290	271657	308269	86370.3	188701	662415	429992	248066
558.676	4.01322								218005	328353	108282	428710	124332	266122	422009	473338	327216	203339	651171	786590	337920	480250	656766	189165	690881	461736	624280	-	538322	328920	600199	-	138217	-	-	543954	763842	247419
559.799	4.87297								766818	349082	479672	448061	754858	530687	982776	517471	1.25679e+06	1.63024e+06	2.65082e+06	1.18922e+06	305073	406626	763532	338362	1.32468e+06	925252	1.76851e+06	1.15453e+06	481944	2.23693e+06	2.03779e+06	2.60858e+06	214674	179018	152402	387560	263187	555675
559.806	4.47652								476123	636387	343454	448139	521586	547567	1.34101e+06	1.17466e+06	1.83448e+06	2.68896e+06	2.3219e+06	1.49243e+06	133832	536926	875861	356153	1.22211e+06	347614	1.2326e+06	1.7092e+06	961522	1.8619e+06	848172	1.04047e+06	413860	212754	386706	176224	739251	604094
560.763	12.9853								436688	315345	351896	1.05196e+06	497447	593324	121755	28078.4	930361	397988	119063	97914.7	686298	229474	1.05234e+06	283512	313199	302637	159036	389162	218732	140043	262535	420843	294699	1.65505e+06	744571	528049	250173	365276
560.799	4.39811								328580	170032	291077	214990	256762	51802	342512	549924	465256	667757	296825	773406	386357	111048	271414	230853	-	212108	884765	394907	587802	725124	105481	1.14329e+06	64093.8	526055	252004	759647	21846.4	477043
566.844	21.2652								303414	325955	423459	124531	209796	328088	2.2626e+06	1.3722e+06	1.87512e+06	2.17594e+06	2.08623e+06	2.10966e+06	5.37956e+06	5.83046e+06	5.7221e+06	4.94985e+06	4.27429e+06	5.17883e+06	205108	139391	526490	288412	82634.2	163337	225566	610230	124294	269996	243605	371163
566.892	18.9953								492403	949159	1.37719e+06	620821	839567	476249	2.55891e+06	2.80985e+06	2.1936e+06	2.24475e+06	2.85074e+06	2.89701e+06	3.61187e+06	4.49625e+06	2.98284e+06	1.75429e+06	2.23253e+06	2.63602e+06	1.37176e+06	1.01758e+06	399315	630582	505771	321190	936328	751596	434864	303280	514496	1.25798e+06
569.748	11.372								506295	398709	57199.1	104785	735809	127081	1.08594e+06	127659	885238	474450	718855	1.19172e+06	268642	125789	22588.6	1.20689e+06	584819	1.14757e+06	505023	933825	806096	944247	815332	925654	70259.8	79218.2	59109.5	129313	213569	305101
570.904	4.39213								18320.6	211071	-	-	247925	174681	348416	136899	466942	232941	387138	161576	111699	344572	245065	130106	794338	-	688055	198324	-	522146	716422	487791	2.73759e+06	1.96059e+06	1.3097e+06	1.67567e+06	1.13885e+06	2.30763e+06
572.77	4.22754								172992	559046	102830	113785	-	403947	-	139885	141753	274091	445188	225701	304000	316644	148293	792503	109221	-	569530	298969	34424.7	381683	215767	-	418486	84182.7	435636	1.28098e+06	507399	698896
575.887	13.3774								160471	546960	70181	410544	528916	451339	350349	262192	495370	177966	47238.8	12531.4	47650.4	282858	316679	198578	93190.3	120389	976641	112581	57681.8	17302.2	148981	17080.8	528270	477670	235864	766745	255266	434095
578.685	4.10842								87942.3	305096	422362	-	564142	782402	-	347982	967127	-	542071	163079	351537	394173	585345	90602.3	555804	270008	115748	252278	650112	-	-	244734	48099.9	-	117312	106847	221511	137587
584.742	4.15679								664105	1.04237e+06	460027	2.44967e+06	1.37495e+06	560000	776074	924159	388405	2.32368e+06	223984	1.22358e+06	355192	377601	863901	550642	1.55898e+06	380199	726463	845606	2.01312e+06	1.31511e+06	622846	1.36629e+06	613942	375744	594839	253321	1.19686e+06	837305
584.829	15.453								363138	493153	303481	351483	130367	327405	916082	896759	1.71886e+06	991315	1.09181e+06	491764	597150	848228	503004	1.07211e+06	705479	1.45326e+06	224385	477890	89791	263506	312953	272546	261138	862544	306018	716267	411941	396545
585.782	4.091								284086	375330	107633	403878	305079	415408	493786	253824	499999	297000	528668	-	289609	142913	216759	331193	634320	294862	628027	553354	181137	-	402921	209768	-	314974	257295	-	244890	452114
586.707	4.5695								637952	36011.6	18513.3	331527	463637	262345	397848	300645	70546.3	171389	217733	140224	190207	75501.7	79910.7	649537	399059	703992	177280	1.30028e+06	863841	444357	1.11322e+06	185032	214874	266063	473026	299698	578514	671233
586.721	4.14062								444700	464609	351839	647757	428156	670323	210445	1.09274e+06	1.56965e+06	82638.2	1.20174e+06	206323	170092	227466	319561	1.28384e+06	1.40024e+06	541181	443691	521143	795603	147626	790900	633557	654587	158890	1.11594e+06	86858.1	316395	964507
588.753	4.34798								611174	902807	259598	931875	343714	776752	-	690665	27884.8	614758	901313	562144	117026	266445	592251	-	-	622639	-	521632	522710	360203	530691	163815	41967	34899.1	66827.2	-	-	186629
589.676	13.4938								199045	113153	132008	68351	525393	127708	187649	84119.9	394471	385372	175548	87007.7	81291.6	92096.4	166793	149682	172808	51139	405716	245900	319063	286722	152548	480910	103130	136330	106311	477818	88058.9	196279
590.805	15.3398								436058	495315	104463	55714.3	596549	757707	349453	345624	219844	785698	185612	251490	708352	48409.5	340250	104850	158482	130338	139710	482656	153319	142167	337422	482524	511363	50970.2	153064	186855	409518	619875
592.893	4.58711								355249	578568	91941.8	119874	97913.6	70848.6	197376	-	-	46791.9	111018	-	144128	83964.7	42264.5	-	193161	156650	44947.3	-	292425	110157	-	190669	-	-	19634.6	53974.3	256272	693249
593.825	14.6176								3.37509e+06	2.37358e+06	921426	1.17427e+06	2.97192e+06	981201	1.81958e+06	1.01858e+06	1.73693e+06	9.23437e+06	3.75745e+06	3.99494e+06	6.27621e+06	5.32672e+06	5.63526e+06	6.77015e+06	7.84205e+06	8.27234e+06	1.38431e+06	1.41957e+06	1.49966e+06	1.08539e+06	728326	612795	679462	1.86956e+06	995499	474229	488015	1.40002e+06
594.847	18.7004								1.09412e+06	589431	512363	572431	640488	1.16392e+06	1.69309e+07	1.59718e+07	1.41059e+07	1.44336e+07	1.35952e+07	1.21764e+07	3.01717e+06	3.12311e+06	2.33046e+06	3.31899e+06	2.76536e+06	3.04553e+06	3.69042e+06	4.51532e+06	4.35552e+06	2.52159e+06	3.2717e+06	3.33141e+06	237714	482643	203828	689970	837147	702887
594.848	18.6994								1.09412e+06	589431	512363	659359	640488	705122	1.69309e+07	1.61231e+07	1.41059e+07	1.49708e+07	1.39025e+07	1.22711e+07	3.01717e+06	3.20363e+06	2.51176e+06	3.61267e+06	2.84177e+06	3.16053e+06	3.69042e+06	4.51532e+06	4.35552e+06	2.68431e+06	3.47459e+06	3.59329e+06	237714	482643	203828	689970	443382	873278
598.764	14.3361								575936	1.26294e+06	816079	822685	992919	1.68845e+06	1.2562e+06	410828	402359	367601	532637	1.2461e+06	1.15185e+06	599813	600137	1.58348e+06	483061	320877	972991	1.33398e+06	618570	737746	523470	987604	204957	606039	668821	1.22914e+06	1.01533e+06	1.25383e+06
600.84	13.3985								593247	212814	157993	626572	282317	283454	617696	348275	402864	186899	324912	435309	1.00205e+06	879178	369183	456761	385259	376724	720359	439041	256101	312098	491898	521345	181657	135596	388596	424834	497264	831327
601.693	4.01294								184565	23737.7	396104	-	253590	185887	-	45306.9	200717	139972	848144	-	732842	131849	-	480838	197851	211070	176783	45023.6	648286	385212	714049	432256	71848.3	127086	146074	402430	318426	151769
610.838	18.8344								476111	601452	1.11313e+06	1.07589e+06	1.52042e+06	502106	4.51432e+06	4.22033e+06	5.03929e+06	3.11597e+06	2.93125e+06	2.29929e+06	835131	658930	1.38887e+06	442413	709682	994680	1.47435e+06	828385	472354	1.09627e+06	447634	965550	408763	771471	1.20173e+06	1.51913e+06	1.44e+06	1.12398e+06
612.861	14.2779								211284	347502	251734	227904	116308	190369	1.23891e+06	993896	1.22174e+06	1.64602e+06	852026	1.78688e+06	739040	367889	954252	741636	387175	763688	426526	368744	339455	708842	711563	684602	175091	302415	204445	170919	362212	422849
614.79	14.4909								374750	455406	533652	486860	591075	1.11066e+06	619097	584638	570146	313900	646444	183610	479007	487257	183628	254974	549312	548818	213541	1.02309e+06	845210	850820	696872	602193	586736	477574	582641	571726	215208	465763
614.93	24.1115								486004	811412	303849	889235	253347	265276	2.00921e+06	2.38442e+06	1.85139e+06	1.26439e+06	2.0138e+06	1.11181e+06	2.29062e+06	2.18145e+06	2.10289e+06	1.3006e+06	1.5147e+06	1.26678e+06	300133	572076	382931	130622	208262	666486	1.12343e+06	502421	583075	634456	287758	205354
615.66	14.4318								139741	836417	430083	805684	192506	97477.5	98454.8	204503	73034.1	174758	210487	296874	762551	551613	29551.2	345527	200431	412445	131178	521761	268996	71834.9	142224	156349	235445	101336	26558.8	47860.1	110809	128781
616.721	15.4756								867165	977442	330638	648646	908581	510348	594240	188999	890206	540022	274411	303899	499779	126045	384536	264320	137464	31770.1	835254	399062	604291	190149	219338	217287	630132	127690	490923	592035	422418	455768
616.845	18.9781								2.08161e+06	1.30602e+06	1.57899e+06	1.44407e+06	1.59813e+06	1.3147e+06	1.25547e+06	1.09258e+06	560397	769115	920480	512462	1.04035e+06	759896	1.03951e+06	1.48851e+06	617239	667665	585246	757444	1.73882e+06	1.45209e+06	1.43109e+06	912345	169336	208195	434616	573209	721318	963092
620.699	5.0572								135763	57940.8	302121	500619	288967	413652	159676	45312.1	73440.2	352160	785356	154389	197252	26246.6	43154.3	212484	175441	67577.3	185619	724622	362931	421333	707372	240924	108523	67310.3	66718.1	459242	164260	389160
620.761	4.43987								20360.1	322413	363307	236036	449706	663628	328832	236116	228525	450543	551654	313389	515976	154892	388339	321810	369152	610996	41415.4	590743	394391	186103	220293	625841	84150.4	183544	-	601089	424280	874218
622.778	12.6694								671244	588575	862676	1.01666e+06	1.17913e+06	341269	337185	92845	189992	449457	525853	213501	1.37542e+06	873265	460230	295334	481013	408320	573319	417944	877685	728896	741180	614078	125161	298135	116897	273569	303005	110053
626.663	15.5285								4.57758e+06	4.32772e+06	5.09336e+06	6.21078e+06	3.17716e+06	3.81893e+06	3.27775e+06	2.48287e+06	4.27884e+06	1.04852e+06	835013	727963	3.51008e+06	2.26887e+06	1.50237e+06	1.66238e+06	1.76607e+06	1.85912e+06	6.71334e+06	5.12553e+06	5.22377e+06	2.14667e+06	2.93433e+06	4.50509e+06	1.35555e+06	1.63473e+06	1.11005e+06	2.8317e+06	2.74524e+06	2.59689e+06
627.37	13.2279								46326	-	575711	-	104135	-	270855	488622	296837	361783	254726	138277	37784.5	99711	-	41301.7	36404.3	-	30913.1	63797.6	88156.7	159904	68219.8	49780.3	47410.3	-	154570	119357	55045.9	165769
630.774	15.3513								416669	289325	309053	784931	537456	307826	556359	663192	385527	221020	414507	378496	407779	191175	642185	812097	128601	106149	1.01865e+06	634572	722469	638315	623035	785268	285888	255925	457771	347363	442075	452547
631.804	15.424								743666	926155	325451	1.28625e+06	861670	968274	428029	408829	563594	254702	443818	469163	254240	148998	260738	419960	510566	141257	714829	547952	491210	228906	290768	425499	827788	846745	755180	710425	676735	567629
636.773	4.19338								299003	634817	-	709379	516038	654370	247630	209226	672701	946433	1.29875e+06	-	280759	385575	-	568897	1.26929e+06	147799	870542	540948	646232	874165	1.31015e+06	351406	207659	41966.7	187257	83661.7	647248	507980
640.647	13.1585								157325	271836	93662.4	529691	89561	103873	44868.2	163552	357588	179458	151830	113155	585025	991412	768438	62151.4	68340.8	121203	120175	363263	-	57666.2	153841	275319	56047.4	64329.4	92216.9	253080	187641	202314
640.832	18.8129								325608	242381	338201	165461	411679	448776	5.79236e+06	4.42313e+06	4.47834e+06	5.21667e+06	5.35961e+06	3.1121e+06	1.3389e+06	1.23256e+06	778511	1.25646e+06	1.00084e+06	1.29487e+06	1.05367e+06	859232	1.54178e+06	819353	866598	813928	352053	177114	27322.4	645170	741152	216293
640.835	4.2437								144533	337912	524493	150499	631043	165582	615153	318615	465506	310217	684627	419281	223482	703036	1.17449e+06	3.86551e+06	4.65446e+06	2.05778e+06	1.90305e+06	1.02375e+06	1.72977e+06	1.77742e+06	3.29617e+06	2.54666e+06	-	105241	-	164127	258311	185108
641.812	4.07345								69329.7	-	-	183949	-	-	461814	-	79173.6	215224	62838.2	-	223782	560545	187512	771250	609861	1.5367e+06	256244	189059	897106	-	82050.4	341059	93864.5	-	-	184738	132226	93369.5
642.89	14.0753								745804	287573	1.49229e+06	640158	568806	471440	6.45594e+06	5.3845e+06	7.04034e+06	6.62912e+06	6.30993e+06	5.42804e+06	2.04789e+06	1.29706e+06	1.2356e+06	1.67557e+06	1.02348e+06	1.0447e+06	985927	1.71207e+06	522582	1.44572e+06	467253	681352	61423.3	270632	116824	297090	363533	696885
643.026	26.7979								1.11534e+06	1.23485e+06	687244	1.48835e+06	1.34113e+06	1.4375e+06	2.32471e+06	1.66449e+06	2.02547e+06	783064	749121	1.52158e+06	818320	647256	630589	267158	437875	1.03622e+06	2.3479e+06	2.54514e+06	1.82956e+06	905272	792807	1.15147e+06	762900	967245	899608	1.81184e+06	1.03985e+06	1.16142e+06
644.773	4.55004								-	202262	-	71065.3	256454	175103	178543	-	-	422068	65845.7	56928.7	100045	-	48590.5	15619.4	166772	184524	305312	345164	133041	478886	923542	53827.5	-	134608	95189.8	-	57921.6	254056
652.658	15.4429								544013	493903	173680	565605	440097	226467	674385	128951	363536	257370	162185	141208	158125	173417	175412	816554	258148	332931	659624	898170	160966	339602	496349	307851	194841	156932	115843	501292	107782	214397
656.764	5.11118								1.18552e+06	237388	558503	346985	157063	115043	2.29193e+06	1.46019e+06	3.37195e+06	1.34973e+06	2.5018e+06	2.46315e+06	574030	641270	182259	706124	22621.6	847649	300370	4.77037e+06	1.20706e+06	2.1078e+06	7.5247e+06	7.64074e+06	47748.4	98367.2	27149.8	-	68968.7	-
656.774	5.62392								689217	362886	234927	319090	126981	216292	2.96959e+06	4.25403e+06	1.62461e+06	1.42768e+06	922304	597297	441869	162523	460225	553352	314170	513866	8.70618e+06	9.1659e+06	6.221e+06	5.93483e+06	4.37742e+06	4.69982e+06	-	56432.6	8039.76	54068.1	267389	141794
657.764	5.07515								177353	138697	248463	-	102541	60312.4	194869	622229	393345	378145	200997	417713	245093	226729	68129	50317.6	124157	31573.1	1.86647e+06	1.18812e+06	617997	186965	796133	252010	17264.3	-	-	65808.9	24063.3	75607.4
657.834	5.64304								265036	241449	108545	68132.6	83499.1	4635.75	276724	405284	422639	139894	261007	305065	56865.1	196372	168910	156192	124100	95957.5	957975	1.47713e+06	1.35115e+06	654342	691172	644700	11181.4	6863.31	15832.8	20454.2	11121.3	-
657.835	14.4227								578780	857199	278484	160116	163945	138728	387221	226786	548281	5.80376e+06	5.89631e+06	4.70909e+06	4.43708e+06	5.21691e+06	3.18595e+06	4.57092e+06	4.63356e+06	3.92462e+06	105841	125911	127134	523608	115601	166873	949778	831208	1.08058e+06	69004.7	121600	266501
662.047	4.33072								431662	179502	157696	1.74045e+06	570428	306263	374086	186849	-	232135	218115	-	133974	-	49069.1	114714	58313.8	-	480385	-	506529	87745.4	455557	-	605318	-	-	-	397462	36502.4
663.922	4.41033								160783	87802.1	259465	144413	160193	-	112807	215794	-	280128	-	360983	204479	67919.1	213707	74875.1	282670	302335	-	1.01532e+06	692518	97617.6	273815	846512	-	203317	224619	249041	26477.4	158226
664.735	4.82541								641748	565653	480715	1.20016e+06	1.05471e+06	489240	535674	1.08064e+06	892271	824997	1.388e+06	1.0946e+06	2.46446e+06	2.09613e+06	6.96055e+06	3.56576e+06	4.33321e+06	1.77629e+06	1.14328e+06	2.15296e+06	3.26371e+06	3.1301e+06	4.3804e+06	3.07298e+06	284175	-	380294	95623.8	375013	181061
664.801	4.25954								952267	1.07561e+06	592521	1.03496e+06	2.40249e+06	348102	2.09635e+06	649028	1.67284e+06	611052	2.63422e+06	860761	6.18678e+06	5.5863e+06	6.10863e+06	2.81128e+06	8.03596e+06	6.85081e+06	7.35949e+06	8.69044e+06	3.66107e+06	3.07179e+06	4.10009e+06	4.83454e+06	-	325104	102063	437163	544979	640431
665.07	31.7242								2.53062e+06	708664	2.13296e+06	1.31086e+06	4.11415e+06	1.66959e+06	2.30555e+06	1.78636e+06	1.24715e+06	5.54394e+06	4.8176e+06	3.30101e+06	888288	456633	557012	481887	970645	322895	688155	313868	456801	849229	702332	700995	799010	638131	1.17727e+06	1.25353e+06	636263	927961
665.786	4.42019								635318	-	86322.1	595563	61569.3	567859	165695	261975	562836	105418	547972	331037	399634	309075	1.2664e+06	498998	1.37316e+06	318297	997037	1.86086e+06	487995	1.22946e+06	1.14109e+06	535652	219448	12507	40886.5	151173	-	148196
667.074	29.7595								2.61707e+06	750541	673556	1.76309e+06	1.97177e+06	899800	2.29551e+06	833966	1.63638e+06	5.52352e+06	4.75791e+06	3.18519e+06	918754	950410	833069	782506	855065	812000	575862	1.07006e+06	453785	1.14744e+06	1.12045e+06	1.17255e+06	1.07751e+06	735779	917435	1.1441e+06	829358	920961
671.839	4.8438								105604	217878	89089.1	77566.5	122916	184476	187929	250571	293220	-	379231	630863	445100	220701	220697	68387.6	266638	263450	1.24483e+06	1.08247e+06	412658	485012	543141	272316	44843.6	56017.1	-	316902	35247.7	175796
674.81	14.3558								3.70901e+06	4.42327e+06	4.89048e+06	4.01845e+06	3.04872e+06	4.3494e+06	2.72974e+06	1.8571e+06	1.73303e+06	1.32655e+06	1.33034e+06	2.23365e+06	3.09464e+06	3.53058e+06	2.59277e+06	2.87586e+06	2.78041e+06	2.27468e+06	2.69626e+06	2.97611e+06	3.08123e+06	1.66525e+06	2.34445e+06	2.79047e+06	1.20405e+06	1.9707e+06	1.64846e+06	1.84825e+06	1.46683e+06	854045
676.796	14.3442								391575	694961	292622	488343	1.18796e+06	563024	714471	155324	673279	888560	162454	158333	114156	236419	364807	234463	103321	531105	773008	822000	372493	577044	494080	926263	181976	223331	398983	621541	456250	651740
676.916	4.32839								148961	448175	292062	489184	38973.9	667151	230721	34081.6	325547	458091	502789	110523	206399	107889	31129.5	294510	351290	92277.8	558177	117925	88954	982138	263248	235335	83387.4	309780	103060	-	61856.2	69398.3
677.019	23.6286								1.46909e+06	1.46011e+06	751952	3.37439e+06	2.31564e+06	3.0481e+06	4.54473e+06	3.8954e+06	4.53341e+06	1.09896e+06	1.58127e+06	1.02434e+06	152949	177872	450264	235274	68262.6	178014	2.42181e+06	2.33825e+06	1.56728e+06	711984	551332	843606	3.72836e+06	3.18036e+06	3.36416e+06	4.3549e+06	2.45653e+06	2.47511e+06
678.798	15.463								86523.1	360930	487290	605255	75417.3	397353	554240	843948	160198	92010.1	201761	156599	331773	331480	43160.3	223403	455388	131719	2.13576e+06	1.49688e+06	1.55628e+06	953478	1.11912e+06	1.06978e+06	171746	306176	118926	528071	430706	136826
679.876	12.605								346321	209207	16720.9	424515	308021	246138	406038	146930	275216	623652	462704	973541	280909	229191	415586	603761	241083	468475	124632	162101	151427	134818	121266	192062	243823	237204	287638	49817.1	72190.9	504874
680.761	5.93271								201229	344333	224320	105203	35616.6	153919	611941	298966	655264	256885	451143	528592	510069	373099	931895	297731	160678	248886	776038	763521	1.0326e+06	473864	656448	615442	256021	83300.4	200206	94920.5	244435	225632
682.876	4.06636								6.37697e+06	5.44731e+06	6.93038e+06	1.65611e+07	1.42337e+07	1.23806e+07	4.04619e+07	6.71441e+07	5.48764e+07	6.10195e+07	7.36332e+07	6.62047e+07	7.531e+06	9.44215e+06	1.29452e+07	1.7935e+07	2.39279e+07	1.7971e+07	9.81172e+07	8.83556e+07	9.75996e+07	9.55149e+07	8.72565e+07	8.86197e+07	1.21966e+07	7.64881e+06	1.08751e+07	1.98227e+07	1.6448e+07	1.80552e+07
684.844	4.25324								390455	298620	453176	527371	647754	684556	1.3904e+06	3.15637e+06	2.37578e+06	7.92676e+06	2.06386e+06	2.6311e+06	162888	936322	1.47191e+06	2.81792e+06	1.55069e+06	535449	4.46504e+06	2.01024e+06	3.36447e+06	3.84087e+06	4.04185e+06	4.63823e+06	721837	668793	234649	1.13056e+06	1.28627e+06	1.06219e+06
690.882	13.3815								132282	462201	48951.8	70221.8	522391	168896	372993	220810	481884	203476	81075.8	192602	1.30072e+06	891776	355406	1.18274e+06	832338	1.02839e+06	141452	486254	-	64091.4	227016	389174	475344	39716.2	591299	138332	75129.9	304326
694.763	12.9436								1.92215e+06	99884.5	297648	587443	570176	339939	94150.3	704843	992813	448140	599649	443753	317783	120751	356826	352217	326766	323864	348960	1.55506e+06	769252	665778	537288	690346	210410	368402	129063	250601	719550	468542
702.222	14.8717								79510.5	148200	148578	423482	184343	106732	93090.2	141151	102930	236948	71117.5	135986	100157	1.22567e+06	554228	265148	414903	288304	95066.1	156010	56427.2	232797	62493.1	228707	46464.5	229116	62856.4	73158.3	-	113883
702.745	14.8015								82704.8	148200	148578	296188	184343	166462	60635.1	56255.3	316929	70656.8	202246	50087	788157	927261	427820	724669	1.0661e+06	942729	153994	277317	68239	578793	179058	375221	46464.5	229116	62856.4	125679	75318	64716.4
704.938	12.9711								601669	665142	913352	1.25111e+06	521290	733134	1.05711e+06	338241	657329	523382	530297	285085	1.31881e+06	852299	921798	1.0458e+06	639573	621294	293303	846172	256460	680937	437227	540012	509314	1.18899e+06	44361.2	289764	1.83544e+06	806603
706.867	5.43329								261563	201522	146310	388064	356053	245641	1.21834e+06	1.27747e+06	1.8045e+06	1.36278e+06	1.39741e+06	1.70055e+06	263667	490401	647736	472563	1.1048e+06	435568	3.46588e+06	1.86156e+06	621266	1.49187e+06	2.20804e+06	2.0984e+06	164036	466508	170096	707556	412063	719676
706.879	6.02626								91957.4	62794.6	157292	127225	146581	37243.1	609183	343518	419160	556278	436169	654204	166088	33667	486304	143877	285160	77318.2	1.27564e+06	746934	733939	315071	806258	301599	169721	192867	30354.8	74972.9	86905.1	238679
706.89	4.47158								371825	488211	556488	381859	254306	381469	2.46905e+06	2.61172e+06	1.77989e+06	1.08296e+07	1.1144e+07	1.22524e+07	1.62498e+06	3.11975e+06	3.01302e+06	882345	2.72776e+06	1.671e+06	1.12404e+07	7.17806e+06	7.5427e+06	8.82101e+06	8.38344e+06	6.57612e+06	590788	361143	1.05081e+06	3.2218e+06	1.3171e+06	3.686e+06
707.756	15.0645								4.52114e+06	4.76733e+06	6.548e+06	2.59089e+06	5.10276e+06	5.07742e+06	2.64671e+06	1.07337e+06	3.5586e+06	3.70619e+06	3.77427e+06	3.46089e+06	2.78526e+06	4.12607e+06	3.65485e+06	3.62769e+06	3.19496e+06	3.13716e+06	1.77267e+06	848657	1.26122e+06	1.18775e+06	1.04745e+06	1.49954e+06	3.79545e+06	6.22458e+06	5.40473e+06	1.32215e+06	1.18244e+06	2.28039e+06
707.882	4.31203								115009	19560.1	527057	780637	396722	681889	365852	156184	1.99668e+06	2.07585e+06	3.03003e+06	1.29239e+06	819921	513147	209472	912519	131887	63505.2	2.8446e+06	913770	1.97644e+06	2.50007e+06	1.02157e+06	2.98444e+06	195252	187594	379886	754538	1.50535e+06	498987
707.919	4.96242								19251.8	159946	46059.6	200129	247421	57575.2	1.45719e+06	1.699e+06	825700	978224	1.28449e+06	2.85946e+06	300867	224448	302150	204581	320430	112887	1.33084e+06	2.05797e+06	1.24125e+06	2.10049e+06	599624	992510	383599	35158.2	97021.1	582104	261641	196718
708.861	4.67258								96704.4	325214	44273.5	154044	-	99717.6	260475	358152	607774	437031	605541	348721	206520	95236.3	405440	489894	159018	180734	448802	257274	267873	420880	746743	191820	-	137068	-	155960	346138	283980
710.779	13.074								119474	194900	1.01021e+06	86447.3	341432	283821	236490	1.4371e+06	862460	253903	176595	155162	335568	103442	197794	218374	288460	291441	442429	468298	39003.1	127081	387069	123886	173064	461628	769970	831438	340180	502534
722.66	13.7319								711172	981954	730083	746889	326604	783074	333167	-	362341	65673	97081.7	73197.7	60852.1	341718	54396.3	46852.2	193419	38739.3	2.14066e+06	1.18255e+06	1.73965e+06	1.41714e+06	665103	1.09667e+06	24868.3	113320	66931.5	61736.6	224505	311285
723.118	31.6548								486075	1.01667e+06	787356	515981	327803	502695	1.05544e+06	490686	953455	444497	609259	223812	826178	630055	908333	782411	473005	429551	717405	1.09074e+06	872488	775401	896000	422499	1.04984e+06	780442	1.43331e+06	783713	608722	1.22176e+06
728.859	13.1673								2.92527e+06	1.76332e+06	2.44465e+06	2.93269e+06	2.24342e+06	1.63371e+06	3.57444e+06	2.97613e+06	3.16909e+06	935388	864743	1.27075e+06	1.14933e+06	953568	1.06764e+06	478726	1.39073e+06	798507	1.50982e+06	1.91924e+06	1.04223e+06	1.63212e+06	1.11997e+06	1.14985e+06	3.38062e+06	3.00491e+06	2.2955e+06	2.83403e+06	3.33833e+06	1.83255e+06
728.864	15.0369								435233	491716	1.22154e+06	759792	538499	119530	500687	449370	378662	222091	215190	570174	365731	185090	458558	486448	171343	449982	87748.3	246530	144337	146259	166884	392078	875360	756908	416795	308346	181390	264342
729.867	13.1435								2.0556e+06	1.05254e+06	346481	514046	973075	561423	777207	1.01594e+06	1.39552e+06	80985.2	310927	209306	125032	410378	367620	329847	365511	146627	790153	1.04665e+06	365030	110283	143032	324841	522342	2.12462e+06	2.01405e+06	1.21319e+06	858889	358152
730.766	13.0906								21125	90369.7	661405	157181	498338	518774	760198	984698	255513	112167	48504.8	339503	348422	103199	682588	642143	345421	32300.8	151940	281012	409589	132461	313032	163347	496711	474172	450984	1.02192e+06	755108	303971
730.913	6.00169								69273.8	55482.5	124987	194517	55487.3	105250	347709	113132	397392	775417	234820	197942	457198	579340	948036	152323	339762	241105	267338	235935	270778	165578	614112	212858	217690	136978	98266.7	87906.4	325442	476316
734.919	20.8413								809790	370607	551177	450248	694992	535351	488563	569388	509226	662307	550879	841777	670365	652675	395435	777730	1.3304e+06	810370	1.8894e+06	1.38938e+06	1.10154e+06	2.63113e+06	2.30005e+06	2.18359e+06	51769.9	150059	115623	236263	575859	601963
738.908	18.292								2.70151e+06	2.71802e+06	3.86021e+06	3.5017e+06	3.04733e+06	3.28076e+06	2.52564e+06	1.70503e+06	2.63021e+06	1.36577e+06	1.28568e+06	1.19663e+06	1.14572e+06	2.07924e+06	1.3479e+06	2.13479e+06	1.9791e+06	2.72678e+06	2.02626e+06	1.98524e+06	1.74797e+06	1.48031e+06	1.64162e+06	1.59804e+06	1.49137e+06	1.23367e+06	781582	2.26562e+06	1.64653e+06	1.52639e+06
742.311	4.14941								489929	-	153973	163849	391990	231258	139229	296406	124819	232745	430930	-	-	70355.5	30595.7	28761.1	290355	267128	83996.1	163166	100097	-	233207	152768	-	-	102517	279894	105677	-
805.098	25.3323								873510	468148	645258	2.12163e+06	1.14763e+06	1.30426e+06	1.63917e+06	1.19899e+06	1.78222e+06	1.04733e+06	748529	542746	566800	710447	599778	246846	566691	349510	1.56563e+06	1.50708e+06	729242	1.16406e+06	856627	1.05702e+06	2.52602e+06	2.45935e+06	2.1716e+06	4.6362e+06	3.56613e+06	4.26878e+06
839.086	21.3598								614524	241918	347816	828699	610818	723455	601925	816055	690724	520461	423162	806627	166406	92939.4	121125	227428	170714	176553	1.05169e+06	1.13725e+06	899497	864891	877637	1.19948e+06	553617	628823	647295	994309	666829	1.0189e+06
1126.95	23.1343								738200	1.05359e+06	682814	1.81451e+06	605891	752466	-	86247.5	73487.6	51509.2	5939.2	53979.6	580179	268228	250672	1.73523e+06	422871	1.4592e+06	70896.9	40205.4	40059	56651.9	184724	239470	531071	583108	511845	1.27161e+06	853513	213556
