# Supplementary material for: Metabolomic Profiling and Antioxidant Activity of Fruits Representing Diverse Apple and Pear Cultivars
Source: Biology (Basel). 2021 Apr 28;10(5):380. doi: 10.3390/biology10050380 (PMC8145694; doi:10.3390/biology10050380)
Supplement: Supplementary file 1 [file biology-10-00380-s001.zip › Table S1.xlsx]

## Sheet: APPLES
	APPLES
	mg/100g (fresh weight), mean of three biological replicats +/- standard deviation
	NMR analysis
	2014
	Fuji			Golden delicious		Golden delicious 2015	Granny Smith		Imperatore 2014	Imperatore		Pom prussian 2015	Pom Prussian		Pom prussian 2014	Royal Gala		Royal gala 2014
valine	0.388955	+/-	0.0193344	0.374498	+/-	0.010838	0.378513	+/-	0.0151835	0.374238	+/-	0.0034205	0.2267	+/-	0.0427253	0.438822	+/-	0.0363532
isoleucine	0.53994	+/-	0.0596957	0.215386	+/-	0.0110272	0.218229	+/-	0.0153654	0.269916	+/-	0.0198268	0.206681	+/-	0.0264829	0.329639	+/-	0.0471755
alanine	0.637045	+/-	0.0142156	1.06853	+/-	0.034268	1.13431	+/-	0.0465755	0.72982	+/-	0.0274963	0.698483	+/-	0.130837	1.92224	+/-	0.0496216
asparagine	36.4702	+/-	0.273181	50.0668	+/-	3.37386	62.2118	+/-	5.19186	23.1188	+/-	1.59688	8.81249	+/-	1.41792	65.6006	+/-	3.32686
aspartic acid	23.3492	+/-	1.47876	7.39972	+/-	0.837593	7.75079	+/-	0.884837	4.74491	+/-	0.403812	3.58948	+/-	0.313427	19.6587	+/-	0.192332
malic acid	261.755	+/-	19.5124	359.41	+/-	23.0611	591.137	+/-	46.2668	217.238	+/-	17.813	278.513	+/-	24.2029	234.822	+/-	7.7314
sucrose	2046.24	+/-	155.119	1951.54	+/-	96.7941	1403.75	+/-	183.21	1898.03	+/-	192.963	1805.47	+/-	115.898	2428.92	+/-	115.126
fructose	5311.15	+/-	216.958	4442.03	+/-	309.109	2968.37	+/-	273.797	3935.44	+/-	303.639	3110.83	+/-	293.562	3897.35	+/-	187.049
glucose	2284.27	+/-	18.6695	1576.49	+/-	72.9654	1613.38	+/-	138.83	1138.65	+/-	46.7278	1518.89	+/-	181.836	1057.13	+/-	52.9805
	2015
	Fuji			Golden delicious		Golden delicious 2015	Granny Smith		Imperatore 2014	Imperatore		Pom prussian 2015	Pom Prussian		Pom prussian 2014	Royal Gala		Royal gala 2014
valine	0.269767	+/-	0.0193822	0.283009	+/-	0.0484484	0.470668	+/-	0.0628299	0.386792	+/-	0.0459099	0.216152	+/-	0.00835325	0.585545	+/-	0.0575629
isoleucine	0.39651	+/-	0.0180535	0.209564	+/-	0.0222549	0.209881	+/-	0.0259985	0.281323	+/-	0.0329207	0.226482	+/-	0.015166	0.435618	+/-	0.0350292
alanine	0.601329	+/-	0.0439757	1.14052	+/-	0.173596	1.65395	+/-	0.174983	1.1844	+/-	0.156749	1.20854	+/-	0.0821936	2.13743	+/-	0.212879
asparagine	35.135	+/-	6.83833	48.5474	+/-	3.2318	63.1528	+/-	8.91095	36.9433	+/-	8.28572	15.0253	+/-	2.03201	78.4978	+/-	11.6187
aspartic acid	24.7423	+/-	2.30427	7.67298	+/-	0.395987	7.32263	+/-	0.282062	5.56803	+/-	0.704775	6.86182	+/-	0.277979	25.0344	+/-	3.18844
malic acid	307.045	+/-	16.6676	325.579	+/-	15.3949	565.568	+/-	53.945	258.919	+/-	27.6876	418.802	+/-	20.7917	187.596	+/-	15.3957
sucrose	2383.03	+/-	86.2261	2094.86	+/-	93.5714	1163.5	+/-	78.6358	1900.23	+/-	212.872	2946.19	+/-	126.629	1776.32	+/-	108.753
fructose	4558.66	+/-	158.341	4484.21	+/-	392.497	2769.47	+/-	160.931	4570.13	+/-	451.205	3118.42	+/-	242.606	3739.68	+/-	388.678
glucose	2272.61	+/-	129.333	1615.07	+/-	138.772	1855.32	+/-	106.486	1821.27	+/-	80.1479	1261.83	+/-	55.7686	1366.75	+/-	107.785
	HPLC-DAD analysis
	2014
	Fuji			Golden delicious		Golden delicious 2015	Granny Smith		Imperatore 2014	Imperatore		Pom prussian 2015	Pom Prussian		Pom prussian 2014	Royal Gala		Royal gala 2014
chlorogenic acid	10.4871	+/-	0.776041	8.23822	+/-	0.745376	4.39875	+/-	1.05367	14.4497	+/-	0.996967	35.1918	+/-	1.15095	9.22033	+/-	1.06243
coumaroyl quinic acid	0.78182	+/-	0.0451943	0.818943	+/-	0.111274	0.186364	+/-	0.171905	0.800627	+/-	0.0814001	5.54521	+/-	0.26237	1.42038	+/-	0.245986
cyanidin-3-O-glucoside	0.0209968	+/-	0.0473287	-	+/-	0	-	+/-	0.019657	0.00181423	+/-	0.0370849	0.0802079	+/-	0.0571144	0.0868819	+/-	0.0425786
quercetin-3-O-galactoside	1.32703	+/-	0.389632	0.594395	+/-	0.137661	1.47067	+/-	0.170184	0.821739	+/-	0.178274	1.24045	+/-	0.0761412	1.30458	+/-	0.226357
quercetin-O-pentoside 2	0.441387	+/-	0.0519146	0.402022	+/-	0.0883227	0.496209	+/-	0.0873686	0.404685	+/-	0.0796916	1.03777	+/-	0.0503427	0.650474	+/-	0.0867003
quercetin-O-deoxyhexoside	0.397277	+/-	0.077166	0.876502	+/-	0.156704	0.707111	+/-	0.0858669	0.621481	+/-	0.0706703	1.39604	+/-	0.0392052	0.601746	+/-	0.0520166
phloretin 2′-O-xyloglucoside	0.342715	+/-	0.011798	0.789057	+/-	0.222883	0.692061	+/-	0.0318481	0.695552	+/-	0.223752	2.12035	+/-	0.0922352	0.640199	+/-	0.0680525
phloridzin (phloretin-2′-O-glucoside)	1.22917	+/-	0.0172197	2.54426	+/-	0.511886	1.20476	+/-	0.231479	1.09431	+/-	0.517681	2.7312	+/-	0.0581269	0.876051	+/-	0.194921
	2015
	Fuji			Golden delicious		Golden delicious 2015	Granny Smith		Imperatore 2014	Imperatore		Pom prussian 2015	Pom Prussian		Pom prussian 2014	Royal Gala		Royal gala 2014
chlorogenic acid	11.4654	+/-	0.989104	9.74351	+/-	1.27499	6.53446	+/-	0.752132	22.9862	+/-	1.06243	38.2788	+/-	0.996967	11.8594	+/-	0.438828
coumaroyl quinic acid	0.953837	+/-	0.0767346	0.963467	+/-	0.0605588	0.252697	+/-	0.111571	1.3819	+/-	0.245986	4.98103	+/-	0.0814001	1.65724	+/-	0.0997552
cyanidin-3-O-glucoside	0.00411749	+/-	0.0267352	-	+/-	0	-	+/-	0.00737179	0.0985292	+/-	0.0425786	0.219637	+/-	0.0370849	-0.0266931	+/-	0.0162039
quercetin-3-O-galactoside	1.27106	+/-	0.473097	0.541033	+/-	0.597267	1.20242	+/-	0.092831	0.649896	+/-	0.226357	1.03005	+/-	0.178274	0.76277	+/-	0.0350716
quercetin-O-pentoside 2	0.568093	+/-	0.181004	0.395303	+/-	0.179849	0.522625	+/-	0.0488866	0.447099	+/-	0.0867003	0.746611	+/-	0.0796916	0.391395	+/-	0.0199109
quercetin-O-deoxyhexoside	0.529001	+/-	0.0794013	1.00219	+/-	0.249592	0.918723	+/-	0.0546234	0.849799	+/-	0.0520166	1.52427	+/-	0.0706703	0.623837	+/-	0.0254132
phloretin 2′-O-xyloglucoside	0.742816	+/-	0.239299	1.43242	+/-	0.238211	1.5487	+/-	0.096396	1.69007	+/-	0.0680525	3.11376	+/-	0.223752	1.4208	+/-	0.0509445
phloridzin (phloretin-2′-O-glucoside)	1.42048	+/-	0.181273	2.27215	+/-	0.420171	1.37879	+/-	0.292205	1.3659	+/-	0.194921	3.33284	+/-	0.517681	1.63021	+/-	0.607848
nd= not detected

## Sheet: PEARS
	PEARS
	mg/100g (fresh weight), mean of three biological replicates +/- standard deviation
	NMR analysis
	2014
	Abate			Conference			Decana			Kaiser			Williams
valine	1.5384	+/-	0.239853	2.9829	+/-	0.376243	2.23918	+/-	0.0715722	4.83709	+/-	0.439089	2.39015	+/-	0.295057
isoleucine	0.996767	+/-	0.153864	1.2773	+/-	0.179972	1.5218	+/-	0.0780456	1.85107	+/-	0.16901	2.66666	+/-	0.190834
alanine	0.934898	+/-	0.129567	1.60149	+/-	0.0538844	0.996962	+/-	0.0206249	1.77208	+/-	0.114114	1.56856	+/-	0.142384
aspartic acid	4.67407	+/-	0.810447	11.1371	+/-	0.265401	9.75294	+/-	0.415574	8.46415	+/-	0.778783	15.8354	+/-	1.32429
asparagine	62.0984	+/-	8.84401	92.4825	+/-	14.1235	107.418	+/-	1.45937	90.3248	+/-	9.55414	154.792	+/-	9.38775
malic acid	253.433	+/-	11.4051	304.776	+/-	8.11359	253.69	+/-	14.7128	346.084	+/-	45.4844	202.825	+/-	15.7756
succinic acid	0.169645	+/-	0.0103555	0.643652	+/-	0.0849668	0.709885	+/-	0.0189042	0.952427	+/-	0.062933	1.83555	+/-	0.167087
xylose	nd			150.165	+/-	3.72444	nd			51.6852	+/-	11.8567	83.7502	+/-	3.07316
glucose	2308.71	+/-	158.68	1714.85	+/-	83.9424	997.729	+/-	55.2711	1099.74	+/-	166.525	1310.57	+/-	98.4275
sucrose	521.69	+/-	30.017	2212.34	+/-	347.482	692.17	+/-	78.7916	3941.34	+/-	536.17	1308.02	+/-	130.994
fructose	4323.9	+/-	276.416	5287.66	+/-	110.348	4341.76	+/-	248.28	4462.5	+/-	573.553	6116.94	+/-	435.271
	2015
	Abate			Conference			Decana			Kaiser			Williams
valine	1.5384	+/-	0.239853	2.9829	+/-	0.376243	2.23918	+/-	0.0715722	4.83709	+/-	0.439089	2.39015	+/-	0.295057
isoleucine	0.996767	+/-	0.153864	1.2773	+/-	0.179972	1.5218	+/-	0.0780456	1.85107	+/-	0.16901	2.66666	+/-	0.190834
alanine	0.934898	+/-	0.129567	1.60149	+/-	0.0538844	0.996962	+/-	0.0206249	1.77208	+/-	0.114114	1.56856	+/-	0.142384
aspartic acid	4.67407	+/-	0.810447	11.1371	+/-	0.265401	9.75294	+/-	0.415574	8.46415	+/-	0.778783	15.8354	+/-	1.32429
asparagine	62.0984	+/-	8.84401	92.4825	+/-	14.1235	107.418	+/-	1.45937	90.3248	+/-	9.55414	154.792	+/-	9.38775
malic acid	253.433	+/-	11.4051	304.776	+/-	8.11359	253.69	+/-	14.7128	346.084	+/-	45.4844	202.825	+/-	15.7756
succinic acid	0.169645	+/-	0.0103555	0.643652	+/-	0.0849668	0.709885	+/-	0.0189042	0.952427	+/-	0.062933	1.83555	+/-	0.167087
xylose	nd			150.165	+/-	3.72444	nd			51.6852	+/-	11.8567	83.7502	+/-	3.07316
glucose	2308.71	+/-	158.68	1714.85	+/-	83.9424	997.729	+/-	55.2711	1099.74	+/-	166.525	1310.57	+/-	98.4275
sucrose	521.69	+/-	30.017	2212.34	+/-	347.482	692.17	+/-	78.7916	3941.34	+/-	536.17	1308.02	+/-	130.994
fructose	4323.9	+/-	276.416	5287.66	+/-	110.348	4341.76	+/-	248.28	4462.5	+/-	573.553	6116.94	+/-	435.271
	HPLC-DAD analysis
	2014
	Abate			Conference			Decana			Kaiser			Williams
caffeoyl quinic acid	6.91577	+/-	0.353072	10.5521	+/-	1.36357	3.83433	+/-	1.62337	4.81321	+/-	0.260873	9.00909	+/-	0.742435
quercetin-3-O-glucoside	0.142674	+/-	0.0620995	0.225623	+/-	0.0438602	0.0258429	+/-	0.00218101	-0.0269125	+/-	0.0204763	0.102426	+/-	0.173227
isorhamnetin-3-O-glucoside-1	0.710233	+/-	0.0429417	0.194206	+/-	0.00645549	0.102833	+/-	0.0120779	nd			0.340316	+/-	0.03203
isorhamnetin-3-O-glucoside-2	0.527026	+/-	0.0678104	0.768778	+/-	0.196554	0.273934	+/-	0.0144768	0.048286	+/-	0.0307769	0.265455	+/-	0.0217036
isorhamnetin-O-(acetyl) glucoside-1	0.339506	+/-	0.0428735	nd			0.0760873	+/-	0.00865961	-0.0183328	+/-	0.0105844	0.100604	+/-	0.0060086
isorhamnetin-O-(acetyl) glucoside-2	1.07247	+/-	0.147322	0.0106526	+/-	0.0118588	0.532337	+/-	0.053321	0.0721427	+/-	0.0422926	0.696806	+/-	0.116694
	2015
	Abate			Conference			Decana			Kaiser			Williams
caffeoyl quinic acid	6.85592	+/-	1.37904	5.0874	+/-	0.03957	4.61123	+/-	0.880868	5.6032	+/-	0.586638	12.7575	+/-	0.727495
quercetin-3-O-glucoside	0.177688	+/-	0.013014	0.310139	+/-	0.0442041	0.319997	+/-	0.13184	0.284719	+/-	0.0671359	0.611579	+/-	0.0547481
isorhamnetin-3-O-glucoside-1	0.774587	+/-	0.0775626	0.249591	+/-	0.0236816	0.352668	+/-	0.120381	0.363461	+/-	0.0603452	0.837992	+/-	0.0915105
isorhamnetin-3-O-glucoside-2	0.707429	+/-	0.0328094	1.05421	+/-	0.148868	0.929941	+/-	0.330394	0.357281	+/-	0.0885756	1.22617	+/-	0.0766651
isorhamnetin-O-(acetyl) glucoside-1	0.489027	+/-	0.0615874	nd			0.407826	+/-	0.128785	0.0878944	+/-	0.0238306	0.445647	+/-	0.0156324
isorhamnetin-O-(acetyl) glucoside-2	1.19652	+/-	0.120743	nd			1.49191	+/-	0.476193	0.454733	+/-	0.102947	1.85768	+/-	0.0654479
nd= not detected
